# Supplementary material for: Prevalence in the United States of Selected Candidate Gene Variants: Third National Health and Nutrition Examination Survey, 1991–1994
Source: PubMed Central journal article supplement — Am J Epidemiol. 2008 Oct 20;169(1):54–66. doi: 10.1093/aje/kwn286 (PMC2638878; doi:10.1093/aje/kwn286), 2008-10-20
Supplement: kwn286_1.pdf [file kwn286_1.pdf]

## Appendix 1. Details of Genotyping Assays

Neither genotyping lab had methodology developed to analyze all of the genetic variants, so each lab analyzed a subset of the polymorphisms on all DNA specimens available. The Core Genotyping Facility of the National Cancer Institute (NCI) determined the DNA concentration in each of the cell lysates with use of picogreen (Invitrogen Corporation, Carlsbad, California) and a semiquantitative real-time TaqMan assay (Applied Biosystems, Foster City, California) as previously described (1). Each DNA specimen was also characterized by a microsatellite profile of 15 short tandem repeat markers (AmpFLSTR Identifiler PCR Amplification kit, Applied Biosystems) for identification purposes that would be used as a quality control measure to check against duplication and contamination.

For each 5  $\mu$ l TaqMan (5' nuclease assay) reaction, 5 ng of DNA was used. Reactions were set up by using 2.5  $\mu$ l of 2X Universal Master Mix [Applied Biosystems (ABI)] and assay-specific concentrations of primers and dye-labeled probes. Reaction plates were thermocycled using conditions specific to the assay, and the ABI 7900HT sequence-detection system was used to read endpoints.

For MGB Eclipse Probe Systems assays (3' hybridization triggered fluorescence reaction) [Nanogen (formerly Epoch Biosciences), Bothell, Washington] that were performed at NCI, 5 ng of DNA were used for each 5  $\mu$ l assay. Reactions were set up using 2.5  $\mu$ l of the 2X Jumpstart Master Mix (Sigma-Aldrich, St. Louis, Missouri), 0.16  $\mu$ l of 2.5 U/ $\mu$ l JumpStart Taq polymerase (Sigma-Aldrich), and assay-specific concentrations of primers and dye-labeled probes. Reaction plates were thermocycled under assay-specific conditions; and endpoint dissociation (melting) curves were generated on the ABI 7900HT sequence-detection system, by monitoring fluorescence while the reactions were heated from 30°C to 80°C at a 10% ramp rate. Dissociation curves of the first derivative of fluorescence and raw fluorescent values were then exported from the Sequence Detection Systems software (Applied Biosystems) in text format for further analysis with use of DynaDASH melt curve analysis software (Dyna Metrix, Stockholm, Sweden) for genotype scoring.

Details such as primer and probe concentrations and thermocycling conditions for all TaqMan assays and for each MGB Eclipse assay performed at NCI can be found at [http://snp500cancer.nci.nih.gov/assay\\_list.cfm](http://snp500cancer.nci.nih.gov/assay_list.cfm).

For assays performed at the National Center for Environmental Health (NCEH), which are noted in table A1 below, cell lysates were purified by using the ChargeSwitch Direct 96 gDNA kit (Invitrogen). Ten  $\mu$ l of cell lysate were added to ChargeSwitch wells, and purified DNA was eluted in 100  $\mu$ l of elution buffer, according to the manufacturer's instructions. For MGB Eclipse assays, 2  $\mu$ l of DNA were used for each 10  $\mu$ l reaction. Reactions were set up by using 5.0  $\mu$ l of 2X Jumpstart Master Mix (Sigma-Aldrich), 0.32  $\mu$ l of 2.5 U/ $\mu$ l JumpStart Taq polymerase (Sigma-Aldrich), and 0.5  $\mu$ l of each assay-specific 20X MGB primer and probe mix (Nanogen). Reaction plates were thermocycled under standard conditions per the manufacturer's recommendation, and endpoint dissociation (melting) curves were generated as described above. The MGB Eclipse melt curve macro (Nanogen) was used for genotype scoring. For the CBS 68-bp insertion polymorphism, the TET-labeled probe was specific to the insertion region and detected both heterozygous and homozygous insertion genotypes. Variation in peak heights of melting curves relative to melting curves produced by the wild-type control region FAM-labeled probe distinguished between one or two copies of the CBS insertion allele. The genotypes for these individuals were confirmed by polymerase chain reaction (PCR) as previously described (2).

Determination of the *ADRB2* (rs1042714) and *F2* (rs1799963) genotypes was carried out using pyrosequencing technology (Biotage AB, Uppsala, Sweden). Two  $\mu\text{l}$  of DNA were used for each 20  $\mu\text{l}$  reaction mix containing 0.5  $\mu\text{M}$  of a 5' biotinylated forward primer and 0.5  $\mu\text{M}$  reverse primer (see table A1) and Applied Biosystems GeneAmp Fast PCR Master Mix. Amplification was performed by using the 9800 Fast PCR System according to the manufacturer's suggested protocol (Applied Biosystems). Single-stranded biotinylated templates for pyrosequencing analysis were prepared by using 5  $\mu\text{l}$  of the PCR products in a Vacuum Prep Workstation (Biotage AB). The sequencing reactions were performed with 5  $\mu\text{M}$  of sequencing primer and the PSQ 96A SNP Reagent Kit on a PSQ 96HS System, as described by the manufacturer (Biotage AB). Nucleotide dispensation orders and genotype calls were chosen automatically by the system software.

The *ACE* insertion-deletion polymorphism (rs4646994) was determined by capillary fragment analysis (3) with use of the ABI Prism 3730 Genetic Analyzer. Two  $\mu\text{l}$  of DNA were used for each 20  $\mu\text{l}$  reaction mix containing 0.375  $\mu\text{M}$  of a 5' FAM-labeled forward primer, 0.375  $\mu\text{M}$  reverse primer (table A1) and ABI GeneAmp Fast PCR Master Mix. Amplification was performed with use of the ABI 9800 Fast PCR System according to the manufacturer's suggested protocol. PCR product (1  $\mu\text{l}$ ) was resuspended in 9  $\mu\text{l}$  of Hi-Di Formamide (Applied Biosystems) along with 1  $\mu\text{l}$  of ROX-labeled GeneFlow 625 DNA ladder (Chimerx, Madison, Wisconsin), denatured for 1 minute at 96°C, and chilled to 4°C. The denatured sample was injected into a 36 cm 3730 capillary array along with Performance Optimized Polymer 7 using the GeneMapper36-POP7-1-Run Module. Data collection and fragment sizing was achieved by using DataCollection 2.0 and GeneMapper 4.0 3730 system software programs (Applied Biosystems). A 190-bp fragment is generated in the absence of the insertion (deletion genotype), and a 490-bp fragment is generated in the presence of the insertion (insertion genotype).

## References

1. Haque KA, Pfeiffer RM, Beerman MB, et al. Performance of high-throughput DNA quantification methods. *BMC Biotechnol* 2003;3:20.
2. Tsai MY, Hanson NQ, Bignell MK, et al. Simultaneous detection and screening of T833C and G919A mutations of the cystathionine beta-synthase gene by single-strand conformational polymorphism. *Clin Biochem* 1996;29:473-7.
3. Rigat B, Hubert C, Corvol P, et al. PCR detection of the insertion/deletion polymorphism of the human angiotensin converting enzyme gene (*DCP1*) (dipeptidyl carboxypeptidase 1). *Nucleic Acids Res* 1992;20:1433.

**Appendix 2. Deviations From Hardy-Weinberg Proportions, Third National Health and Nutrition Examination Survey (NHANES III), Phase 2 (1991–1994)**

| Gene symbol    | Variant (dbSNP ID)* | P value            |                    |                  |
|----------------|---------------------|--------------------|--------------------|------------------|
|                |                     | Non-Hispanic white | Non-Hispanic black | Mexican-American |
| <i>ABCB1</i>   | rs1045642           | 0.02               | 0.07               | 0.93             |
| <i>ACE</i>     | rs4646994           | 0.11               | 0.10               | 0.27             |
| <i>ADH1B</i>   | rs1229984           | 0.89               | 0.59               | 0.14             |
|                | rs17033             | 0.82               | 0.02               | 0.10             |
|                | rs2066702           | 0.86               | 0.52               | 0.67             |
| <i>ADH1C</i>   | rs1693482           | 0.91               | 0.37               | 0.35             |
|                | rs698               | 0.93               | 0.26               | <0.01            |
| <i>ADRB1</i>   | rs1801252           | 0.11               | 0.78               | 0.83             |
| <i>ADRB2</i>   | rs1042713           | 0.96               | 0.43               | 0.14             |
|                | rs1042714           | 0.74               | 0.16               | 0.66             |
| <i>ADRB3</i>   | rs4994              | 0.27               | 0.78               | 0.82             |
| <i>ALAD</i>    | rs1800435           | 0.63               | 0.48               | 0.69             |
| <i>CAPN10</i>  | rs3792267           | 0.65               | 0.64               | 0.42             |
| <i>B9D2</i>    | rs1800468           | 0.90               | 0.67               | 0.99             |
|                | rs1800469           | 0.93               | 0.54               | 0.18             |
| <i>CAT</i>     | rs769214            | 0.68               | 0.82               | 0.32             |
| <i>CBS</i>     | 844ins68bp          | 0.44               | 0.99               | 0.28             |
| <i>CCL5</i>    | rs2280788           | 0.04               | 0.79               | 0.63             |
| <i>CCR2</i>    | rs1799864           | 0.34               | 0.06               | 0.74             |
| <i>CXCL12</i>  | rs169097            | <0.01              | 0.46               | 0.61             |
| <i>CYP1A1</i>  | rs2472299           | 0.01               | 0.61               | 0.65             |
|                | rs2606345           | 0.71               | 0.21               | 0.72             |
| <i>CYP1A2</i>  | rs11854147          | <0.01              | 0.11               | 0.11             |
|                | rs2069514           | 0.09               | 0.29               | 0.29             |
|                | rs4886406           | 0.13               | 0.18               | 0.87             |
| <i>CYP1B1</i>  | rs1056836           | 0.42               | 0.14               | 0.02             |
|                | rs1056837           | 0.21               | 0.52               | 0.01             |
|                | rs162557            | 0.81               | 0.64               | 0.99             |
| <i>CYP2A6</i>  | rs1801272           | 0.79               | 0.79               | 0.93             |
| <i>CYP2C19</i> | rs4986893           | 0.94               | 0.95               | 0.96             |
|                | rs4986894           | 0.75               | 0.30               | 0.55             |
| <i>CYP2C9</i>  | rs1057910           | 0.28               | 0.08               | 0.58             |
| <i>CYP2E1</i>  | rs2031920           | 0.16               | 0.73               | 0.61             |
| <i>CYP3A4</i>  | rs2740574           | 0.22               | 0.03               | 0.84             |
| <i>F2</i>      | rs1799963           | 0.51               | 0.88               | 0.63             |
| <i>F5</i>      | rs6025              | 0.49               | 0.80               | 0.03             |
| <i>FAM82A</i>  | rs163086            | 0.73               | 0.18               | 0.18             |
| <i>FCGR2A</i>  | rs1801274           | 0.06               | 0.32               | 0.50             |
| <i>FGB</i>     | rs1800790           | 0.81               | 0.01               | 0.82             |
| <i>IL10</i>    | rs1800871           | 0.06               | 0.66               | 0.02             |
|                | rs1800872           | 0.06               | 0.98               | 0.03             |
|                | rs1800896           | 0.89               | 0.35               | 0.36             |
| <i>IL1B</i>    | rs1143623           | 0.76               | 0.58               | 0.44             |
| <i>IL4</i>     | rs2243248           | 0.68               | 0.46               | 0.03             |
|                | rs2243250           | 0.53               | 0.03               | 0.07             |
|                | rs2243270           | 0.71               | 0.01               | 0.08             |

| Gene symbol     | Variant (dbSNP ID)* | P value            |                    |                  |
|-----------------|---------------------|--------------------|--------------------|------------------|
|                 |                     | Non-Hispanic white | Non-Hispanic black | Mexican-American |
| <i>IL4R</i>     | rs1801275           | 0.73               | <0.01              | 0.58             |
|                 | rs1805015           | 0.97               | 0.36               | 0.51             |
| <i>ITGA2</i>    | rs1126643           | 0.64               | 0.14               | 0.99             |
| <i>ITGB3</i>    | rs5918              | 0.81               | 0.59               | 0.22             |
| <i>MBL2</i>     | rs11003125          | 0.76               | 0.71               | 0.44             |
|                 | rs1800450           | 0.01               | 0.02               | 0.66             |
|                 | rs1800451           | 0.16               | 0.12               | 0.23             |
|                 | rs5030737           | 0.27               | 0.63               | <0.01            |
| <i>MTHFR</i>    | rs7096206           | 0.41               | 0.97               | <0.01            |
|                 | rs1801131           | 0.07               | 0.42               | 0.77             |
|                 | rs1801133           | 0.10               | 0.49               | 0.93             |
|                 | rs2066470           | 0.32               | 0.25               | 0.84             |
| <i>MTRR</i>     | rs1801394           | 0.74               | 0.82               | 0.04             |
| <i>NAT2</i>     | rs1041983           | 0.77               | 0.03               | 0.66             |
|                 | rs1208              | 0.67               | 0.06               | 0.68             |
|                 | rs1799930           | 0.83               | 0.04               | 0.70             |
|                 | rs1801279           | 0.97               | 0.05               | <0.01            |
|                 | rs1801280           | 0.85               | 0.65               | 0.6              |
| <i>NOS2A</i>    | rs1800482           | 0.96               | 0.81               | <0.01            |
|                 | rs9282799           | 0.96               | 0.65               | 0.89             |
| <i>NOS3</i>     | rs1799983           | 0.35               | 0.10               | 0.11             |
|                 | rs2070744           | 0.31               | 0.07               | 0.01             |
| <i>NQO1</i>     | rs10517             | 0.65               | 0.65               | 0.20             |
|                 | rs1800566           | 0.51               | 0.93               | 0.93             |
|                 | rs34755915          | 0.81               | 0.88               | 0.82             |
|                 | rs689452            | 0.23               | 0.63               | 0.25             |
|                 | rs689453            | 0.23               | 0.25               | 0.21             |
| <i>OGG1</i>     | rs1052133           | 0.11               | 0.14               | 0.12             |
| <i>PON1</i>     | rs662               | 0.37               | 0.98               | 0.90             |
|                 | rs854560            | 0.40               | 0.30               | 0.55             |
| <i>PPARG</i>    | rs1801282           | 0.93               | 0.95               | 0.79             |
| <i>SERPINE1</i> | rs1799762†          | 0.92               | 0.17               | 0.46             |
| <i>TGFB1</i>    | rs1982073           | 0.05               | 0.34               | 0.11             |
| <i>TLR4</i>     | rs4986790           | 0.50               | 0.73               | 0.39             |
| <i>TNF</i>      | rs1800629           | 0.78               | 0.87               | 0.88             |
|                 | rs1800750           | <0.01              | 0.41               | 0.22             |
|                 | rs361525            | 0.06               | 0.53               | 0.20             |
|                 | rs2239185           | <0.01              | 0.98               | 0.85             |
| <i>VDR</i>      | rs731236            | 0.12               | 0.26               | 0.22             |
|                 | rs1001581           | 0.69               | 0.20               | 0.92             |
| <i>XRCC1</i>    | rs1799782           | 0.97               | 0.13               | 0.12             |
|                 | rs25486             | 0.70               | 0.26               | 0.88             |
|                 | rs25487             | 0.67               | 0.16               | 0.76             |
|                 | rs25489             | 0.99               | 0.25               | 0.44             |

\* Unique identifier in the Entrez SNP (single-nucleotide polymorphism) database at the National Center for Biotechnology Information (<http://www.ncbi.nlm.nih.gov/projects/SNP/>).

† Variant is also known as rs1799768 and rs179988.

**Appendix 3. Genes Genotyped in the Third National Health and Nutrition Examination Survey (NHANES III) DNA Bank Samples, Phase 2 (1991–1994), Listed by Pathway**

| <b>Pathway*</b>                                                  | <b>Gene</b>                                                                                                                                                                                                                       | <b>Associated disease/outcome†</b>                                                                                           |
|------------------------------------------------------------------|-----------------------------------------------------------------------------------------------------------------------------------------------------------------------------------------------------------------------------------|------------------------------------------------------------------------------------------------------------------------------|
| Apoptosis, Cell cycle,<br>Cellular growth and<br>differentiation | <i>CAPN10</i><br><i>IL10</i><br><i>IL1B</i><br><i>IL4</i><br><i>IL4R</i><br><i>ITGB3</i><br><i>PPARG</i><br><i>TGFB1</i><br><i>TNF</i><br><i>VDR</i>                                                                              | Cancer<br>Infectious disease<br>Neurodegenerative disease<br>Obesity<br>Osteoporosis<br>Type 2 diabetes                      |
| Blood pressure regulation,<br>Cardiac function                   | <i>ACE</i><br><i>ADRB1</i><br><i>ADRB2</i><br><i>NOS2A</i><br><i>NOS3</i>                                                                                                                                                         | Cardiovascular disease<br>Renal disease<br>Type 2 diabetes                                                                   |
| Cellular adhesion,<br>Cell migration/motility                    | <i>CCL5</i><br><i>CCR2</i><br><i>CXCL12</i><br><i>F2</i><br><i>FGB</i><br><i>ITGA2</i><br><i>ITGB3</i><br><i>SERPINE1</i>                                                                                                         | Cancer<br>Cardiovascular disease<br>Infectious disease                                                                       |
| DNA repair                                                       | <i>OGG1</i><br><i>XRCC1</i>                                                                                                                                                                                                       | Cancer                                                                                                                       |
| Hemostasis                                                       | <i>F2</i><br><i>F5</i><br><i>FGB</i><br><i>ITGA2</i><br><i>ITGB3</i><br><i>NOS3</i><br><i>SERPINE1</i>                                                                                                                            | Cardiovascular disease                                                                                                       |
| Immunity and inflammation                                        | <i>CCL5</i><br><i>CCR2</i><br><i>CXCL12</i><br><i>FCGR2A</i><br><i>IL10</i><br><i>IL1B</i><br><i>IL4</i><br><i>IL4R</i><br><i>MBL2</i><br><i>NOS2A</i><br><i>PPARG</i><br><i>TGFB1</i><br><i>TLR4</i><br><i>TNF</i><br><i>VDR</i> | Asthma<br>Cancer<br>Cardiovascular disease<br>Infectious disease<br>Renal disease<br>Rheumatoid arthritis<br>Type 2 diabetes |

| Pathway*                                     | Gene                                                                                                                                                                                                                                                                                                                                                                                                                                        | Associated disease/outcome†                                                                                                                                              |
|----------------------------------------------|---------------------------------------------------------------------------------------------------------------------------------------------------------------------------------------------------------------------------------------------------------------------------------------------------------------------------------------------------------------------------------------------------------------------------------------------|--------------------------------------------------------------------------------------------------------------------------------------------------------------------------|
| Metabolism of free radicals/Oxidative stress | <i>CAT</i><br><i>NOS2A</i><br><i>NOS3</i><br><i>PON1</i>                                                                                                                                                                                                                                                                                                                                                                                    | Cancer<br>Cardiovascular disease<br>Infectious disease<br>Neurodegenerative disease<br>Renal disease<br>Type 2 diabetes                                                  |
| Nutrient metabolism                          | <i>ACE</i><br><i>ADH1B</i><br><i>ADH1C</i><br><i>ADRB1</i><br><i>ADRB2</i><br><i>ADRB3</i><br><i>ALAD</i><br><i>CAPN10</i><br><i>CAT</i><br><i>CBS</i><br><i>CYP1A1</i><br><i>CYP1A2</i><br><i>CYP1B1</i><br><i>CYP2A6</i><br><i>CYP2C19</i><br><i>CYP2C9</i><br><i>CYP2E1</i><br><i>CYP3A4</i><br><i>MTHFR</i><br><i>MTRR</i><br><i>NOS2A</i><br><i>NOS3</i><br><i>NQO1</i><br><i>PPARG</i><br><i>SERPINE1</i><br><i>TNF</i><br><i>VDR</i> | Asthma<br>Birth defects<br>Cancer<br>Cardiovascular disease<br>Neurodegenerative disease<br>Obesity<br>Osteoporosis<br>Renal disease<br>Type 2 diabetes                  |
| Xenobiotic metabolism                        | <i>ABCB1</i><br><i>ADH1B</i><br><i>ADH1C</i><br><i>ALAD</i><br><i>CYP1A1</i><br><i>CYP1A2</i><br><i>CYP1B1</i><br><i>CYP2A6</i><br><i>CYP2C19</i><br><i>CYP2C9</i><br><i>CYP2E1</i><br><i>CYP3A4</i><br><i>NAT2</i><br><i>NQO1</i><br><i>PON1</i>                                                                                                                                                                                           | Asthma<br>Cancer<br>Cardiovascular disease<br>Drug and alcohol dependency<br>Drug/pharmacological adverse reactions<br>Neurodegenerative disease<br>Rheumatoid arthritis |

\* Not mutually exclusive. Inclusion of genes in pathways based on information gathered from the GeneCards database (<http://www.genecards.org>), the KEGG GENES database (<http://www.genome.jp/kegg/genes.html>), and selected publications for *ACE* (1, 2), *CAPN10* (3), and *SERPINE1* (4-6).

† Includes diseases and clinical outcomes of major public health importance with a proposed or established association with at least one of the genes listed, but the genetic associations are not limited to these diseases.

## References

1. Hu J, Igarashi A, Kamata M, et al. Angiotensin-converting enzyme degrades Alzheimer amyloid beta-peptide (A beta ); retards A beta aggregation, deposition, fibril formation; and inhibits cytotoxicity. *J Biol Chem* 2001;276:47863-8.
2. Sayed-Tabatabaei FA, Oostra BA, Isaacs A, et al. ACE polymorphisms. *Circ Res* 2006;98:1123-33.
3. Turner MD, Cassell PG, Hitman GA. Calpain-10: from genome search to function. *Diabetes Metab Res Rev* 2005;21:505-14.
4. Durand MK, Bodker JS, Christensen A, et al. Plasminogen activator inhibitor-I and tumour growth, invasion, and metastasis. *Thromb Haemost* 2004;91:438-49.
5. Lijnen HR. Pleiotropic functions of plasminogen activator inhibitor-1. *J Thromb Haemost* 2005;3:35-45.
6. Alessi MC, Juhan-Vague I. PAI-1 and the metabolic syndrome: links, causes, and consequences. *Arterioscler Thromb Vasc Biol* 2006;26:2200-7.
