# Supplementary material for: Prevalence in the United States of Selected Candidate Gene Variants: Third National Health and Nutrition Examination Survey, 1991–1994
Source: PubMed Central journal article supplement — Am J Epidemiol. 2008 Oct 20;169(1):54–66. doi: 10.1093/aje/kwn286 (PMC2638878; doi:10.1093/aje/kwn286), 2008-10-20
Supplement: kwn286_2.pdf [file kwn286_2.pdf]

**APPENDIX 4. Weighted Allele Frequencies and Genotype Prevalence in the US Population by Race/Ethnicity, Third National Health and Nutrition Examination Survey (NHANES III), Phase 2 (1991–1994)**

| Gene symbol  | Variant (dbSNP ID) <sup>a</sup> | Minor Allele <sup>b</sup> /All Genotypes | Total <sup>c</sup> |            | Non-Hispanic white |            | Non-Hispanic black |            | Mexican- American |            | P value <sup>d</sup> |
|--------------|---------------------------------|------------------------------------------|--------------------|------------|--------------------|------------|--------------------|------------|-------------------|------------|----------------------|
|              |                                 |                                          | %                  | 95% CI     | %                  | 95% CI     | %                  | 95% CI     | %                 | 95% CI     |                      |
| <i>ABCB1</i> | rs1045642                       | T                                        | 47.3               | 45.6, 49.0 | 51.6               | 50.0, 53.2 | 20.9               | 19.5, 22.4 | 44.7              | 42.3, 47.2 | <0.001               |
|              |                                 | CC                                       | 29.6               | 27.8, 31.5 | 24.4               | 22.8, 26.0 | 63.3               | 60.6, 65.8 | 30.7              | 27.9, 33.6 |                      |
|              |                                 | CT                                       | 46.2               | 44.5, 47.9 | 48.0               | 46.3, 49.7 | 31.6               | 28.9, 34.3 | 49.2              | 46.8, 51.5 | <0.001               |
|              |                                 | TT                                       | 24.2               | 22.3, 26.1 | 27.6               | 25.6, 29.7 | 5.2                | 4.3, 6.2   | 20.2              | 17.7, 22.9 |                      |
| <i>ACE</i>   | rs4646994                       | Ins (I)                                  | 46.2               | 44.6, 47.8 | 45.4               | 43.7, 47.2 | 41.3               | 39.5, 43.1 | 53.4              | 51.2, 55.5 | <0.001               |
|              |                                 | DD                                       | 28.3               | 26.0, 30.7 | 28.8               | 25.9, 31.8 | 33.8               | 31.5, 36.3 | 20.7              | 17.9, 23.7 |                      |
|              |                                 | DI                                       | 51.1               | 48.5, 53.7 | 51.6               | 47.8, 55.3 | 49.8               | 47.3, 52.2 | 51.9              | 49.5, 54.4 | <0.001               |
|              |                                 | II                                       | 20.6               | 18.9, 22.4 | 19.6               | 17.7, 21.8 | 16.4               | 14.6, 18.5 | 27.4              | 25.5, 29.3 |                      |
| <i>ADH1B</i> | rs1229984                       | A                                        | 6.4                | 5.5, 7.5   | 4.7                | 3.9, 5.6   | 1.4                | 0.8, 2.3   | 5.5               | 4.8, 6.2   | <0.001               |
|              |                                 | AA                                       | 1.6                | 1.1, 2.3   | 0.2                | 0.1, 0.5   | 0.0                | NA         | 0.1               | 0.0, 0.3   |                      |
|              |                                 | AG                                       | 9.7                | 8.4, 11.1  | 9.0                | 7.6, 10.7  | 2.7                | 1.6, 4.6   | 10.8              | 9.4, 12.3  | <0.001               |
|              |                                 | GG                                       | 88.8               | 87.0, 90.3 | 90.8               | 89.0, 92.3 | 97.3               | 95.4, 98.4 | 89.2              | 87.7, 90.5 |                      |
|              | rs17033                         | G                                        | 10.0               | 9.2, 10.9  | 8.5                | 7.8, 9.2   | 6.9                | 5.9, 8.1   | 30.0              | 28.0, 32.1 | <0.001               |
|              |                                 | AA                                       | 81.4               | 79.7, 82.9 | 83.8               | 82.5, 85.1 | 86.9               | 84.8, 88.7 | 49.3              | 46.1, 52.5 |                      |
|              |                                 | AG                                       | 17.2               | 15.7, 18.8 | 15.4               | 14.0, 16.9 | 12.5               | 10.8, 14.4 | 41.3              | 38.3, 44.5 | <0.001               |
|              | rs2066702                       | GG                                       | 1.4                | 1.0, 1.9   | 0.8                | 0.4, 1.4   | 0.6                | 0.3, 1.4   | 9.4               | 7.8, 11.2  |                      |
|              |                                 | T                                        | 2.9                | 2.3, 3.6   | 0.4                | 0.2, 0.7   | 20.0               | 18.5, 21.5 | 0.9               | 0.5, 1.4   | <0.001               |
|              |                                 | CC                                       | 94.7               | 93.4, 95.8 | 99.2               | 98.7, 99.6 | 64.0               | 61.5, 66.4 | 98.3              | 97.3, 98.9 |                      |
|              |                                 | CT                                       | 4.8                | 3.8, 6.0   | 0.8                | 0.4, 1.3   | 32.1               | 29.8, 34.5 | 1.7               | 1.1, 2.7   | <0.001               |
|              |                                 | TT                                       | 0.5                | 0.3, 0.6   | 0.0                | NA         | 3.9                | 3.0, 5.1   | 0.0               | NA         |                      |
| <i>ADH1C</i> | rs1693482                       | A                                        | 33.8               | 31.4, 36.3 | 38.5               | 35.4, 41.7 | 14.6               | 12.8, 16.5 | 34.1              | 32.5, 35.8 | <0.001               |
|              |                                 | AA                                       | 12.9               | 11.1, 15.1 | 15.5               | 13.3, 18.1 | 2.3                | 1.5, 3.3   | 11.1              | 9.6, 12.9  |                      |
|              |                                 | AG                                       | 41.7               | 39.8, 43.6 | 45.9               | 43.3, 48.4 | 24.6               | 21.7, 27.6 | 46.0              | 43.3, 48.6 | <0.001               |
|              |                                 | GG                                       | 45.4               | 42.3, 48.5 | 38.6               | 34.5, 42.9 | 73.2               | 69.9, 76.2 | 42.9              | 40.5, 45.4 |                      |
|              | rs698                           | G                                        | 34.4               | 32.0, 36.9 | 39.4               | 36.5, 42.5 | 14.9               | 13.2, 16.8 | 31.1 <sup>e</sup> | 29.3, 33.0 | <0.001               |
|              |                                 | AA                                       | 44.8               | 41.5, 48.1 | 37.4               | 33.4, 41.5 | 72.6               | 69.4, 75.6 | 49.2 <sup>e</sup> | 46.8, 51.5 | <0.001               |
|              |                                 | AG                                       | 41.7               | 39.5, 43.9 | 46.4               | 43.6, 49.2 | 25.0               | 22.2, 28.0 | 39.4              | 37.1, 41.7 |                      |

| Gene symbol  | Variant (dbSNP ID) <sup>a</sup> | Minor Allele <sup>b</sup> /All Genotypes | Total <sup>c</sup> |            | Non-Hispanic white |            | Non-Hispanic black |            | Mexican- American |            | P value <sup>d</sup> |
|--------------|---------------------------------|------------------------------------------|--------------------|------------|--------------------|------------|--------------------|------------|-------------------|------------|----------------------|
|              |                                 |                                          | %                  | 95% CI     | %                  | 95% CI     | %                  | 95% CI     | %                 | 95% CI     |                      |
|              |                                 | GG                                       | 13.5               | 11.7, 15.6 | 16.2               | 14.0, 18.7 | 2.4                | 1.6, 3.5   | 11.5              | 9.7, 13.5  |                      |
| <i>ADRB1</i> | rs1801252                       | G                                        | 15.7               | 13.8, 17.7 | 13.2               | 11.2, 15.5 | 22.5               | 21.0, 24.0 | 28.0              | 26.2, 29.9 | <0.001               |
|              |                                 | AA                                       | 71.5               | 68.3, 74.5 | 75.8               | 72.2, 79.0 | 60.3               | 57.5, 63.1 | 51.8              | 48.8, 54.9 |                      |
|              |                                 | AG                                       | 25.6               | 23.3, 28.1 | 22.0               | 19.4, 24.9 | 34.4               | 31.2, 37.8 | 40.3              | 37.7, 42.9 | <0.001               |
|              |                                 | GG                                       | 2.8                | 2.1, 3.8   | 2.2                | 1.4, 3.6   | 5.2                | 4.1, 6.7   | 7.9               | 6.8, 9.1   |                      |
| <i>ADRB2</i> | rs1042713                       | A                                        | 40.5               | 38.9, 42.2 | 38.9               | 36.9, 40.9 | 49.7               | 47.7, 51.6 | 41.8              | 40.3, 43.2 | <0.001               |
|              |                                 | AA                                       | 16.9               | 15.0, 18.9 | 15.7               | 13.4, 18.2 | 25.0               | 23.1, 27.1 | 15.6              | 14.4, 16.9 |                      |
|              |                                 | AG                                       | 47.3               | 45.0, 49.6 | 46.4               | 43.6, 49.3 | 49.3               | 47.0, 51.7 | 52.3              | 50.1, 54.4 | <0.001               |
|              | rs1042714                       | GG                                       | 35.8               | 33.7, 38.0 | 37.9               | 35.4, 40.4 | 25.6               | 23.2, 28.3 | 32.1              | 29.9, 34.4 |                      |
|              |                                 | G                                        | 36.0               | 34.1, 37.9 | 41.9               | 39.9, 44.0 | 18.0               | 16.6, 19.6 | 21.3              | 19.8, 22.9 | <0.001               |
|              |                                 | CC                                       | 42.5               | 40.2, 44.8 | 34.5               | 31.6, 37.5 | 67.6               | 64.9, 70.2 | 61.4              | 58.8, 63.9 |                      |
|              |                                 | CG                                       | 43.0               | 41.0, 45.0 | 47.3               | 44.4, 50.1 | 28.8               | 26.2, 31.5 | 34.6              | 32.1, 37.2 | <0.001               |
|              | GG                              | 14.5                                     | 12.7, 16.5         | 18.3       | 16.3, 20.4         | 3.7        | 2.7, 5.0           | 4.0        | 3.1, 5.2          |            |                      |
| <i>ADRB3</i> | rs4994                          | C                                        | 8.6                | 7.8, 9.5   | 6.9                | 5.9, 8.0   | 11.7               | 10.3, 13.1 | 16.6              | 14.7, 18.7 | <0.001               |
|              |                                 | CC                                       | 0.9                | 0.7, 1.2   | 0.6                | 0.3, 1.1   | 1.4                | 0.8, 2.5   | 2.7               | 1.9, 3.8   |                      |
|              |                                 | CT                                       | 15.5               | 14.0, 17.0 | 12.5               | 10.8, 14.4 | 20.5               | 18.4, 22.7 | 27.7              | 24.6, 31.1 | <0.001               |
|              |                                 | TT                                       | 83.6               | 82.0, 85.2 | 86.9               | 84.8, 88.7 | 78.1               | 75.7, 80.3 | 69.5              | 65.9, 72.9 |                      |
| <i>ALAD</i>  | rs1800435                       | C                                        | 6.5                | 5.7, 7.4   | 8.1                | 7.0, 9.3   | 1.3                | 1.0, 1.9   | 4.5               | 3.6, 5.5   | <0.001               |
|              |                                 | CC                                       | 0.4                | 0.2, 0.9   | 0.6                | 0.3, 1.2   | 0.0                | NA         | 0.3               | 0.1, 1.0   |                      |
|              |                                 | CG                                       | 12.2               | 10.9, 13.6 | 15.1               | 13.3, 17.0 | 2.7                | 1.9, 3.7   | 8.4               | 6.8, 10.5  | <0.001               |
|              |                                 | GG                                       | 87.4               | 85.9, 88.8 | 84.4               | 82.2, 86.3 | 97.3               | 96.3, 98.1 | 91.3              | 89.3, 93.0 |                      |
| <i>B9D2</i>  | rs1800468                       | A                                        | 6.7                | 6.0, 7.5   | 7.6                | 6.7, 8.7   | 2.8                | 2.1, 3.7   | 4.6               | 4.1, 5.3   | <0.001               |
|              |                                 | AA                                       | 0.4                | 0.2, 0.8   | 0.5                | 0.2, 1.1   | 0.1                | 0.0, 0.5   | 0.2               | 0.1, 0.9   |                      |
|              |                                 | AG                                       | 12.6               | 11.3, 14.0 | 14.3               | 12.6, 16.2 | 5.4                | 4.0, 7.1   | 8.8               | 7.8, 10.0  | <0.001               |
|              |                                 | GG                                       | 87.0               | 85.5, 88.4 | 85.2               | 83.2, 87.0 | 94.5               | 92.7, 95.9 | 90.9              | 89.8, 92.0 |                      |
|              | rs1800469                       | T                                        | 32.1               | 30.7, 33.6 | 31.4               | 29.7, 33.2 | 23.8               | 22.1, 25.6 | 44.8              | 42.6, 46.9 | <0.001               |
|              |                                 | CC                                       | 47.1               | 45.0, 49.1 | 47.6               | 45.1, 50.1 | 58.1               | 55.2, 60.9 | 31.5              | 28.7, 34.6 | <0.001               |

| Gene symbol   | Variant (dbSNP ID) <sup>a</sup> | Minor Allele <sup>b</sup> /All Genotypes | Total <sup>c</sup> |            | Non-Hispanic white |            | Non-Hispanic black |            | Mexican- American |            | P value <sup>d</sup> |
|---------------|---------------------------------|------------------------------------------|--------------------|------------|--------------------|------------|--------------------|------------|-------------------|------------|----------------------|
|               |                                 |                                          | %                  | 95% CI     | %                  | 95% CI     | %                  | 95% CI     | %                 | 95% CI     |                      |
|               |                                 | CT                                       | 41.7               | 39.7, 43.7 | 42.0               | 39.4, 44.6 | 36.3               | 33.7, 39.0 | 47.4              | 44.9, 49.9 |                      |
|               |                                 | TT                                       | 11.2               | 9.9, 12.8  | 10.5               | 8.7, 12.5  | 5.6                | 4.5, 7.0   | 21.1              | 19.2, 23.0 |                      |
| <i>CAPN10</i> | rs3792267                       | A                                        | 24.6               | 23.1, 26.1 | 25.8               | 23.7, 27.9 | 16.2               | 14.3, 18.2 | 27.3              | 25.3, 29.5 | <0.001               |
|               |                                 | AA                                       | 6.4                | 5.7, 7.3   | 6.8                | 5.8, 8.0   | 2.4                | 1.7, 3.4   | 7.3               | 6.1, 8.9   |                      |
|               |                                 | AG                                       | 36.3               | 34.4, 38.2 | 38.0               | 35.3, 40.7 | 27.5               | 24.5, 30.7 | 40.0              | 37.4, 42.6 | <0.001               |
|               |                                 | GG                                       | 57.3               | 54.8, 59.7 | 55.2               | 51.9, 58.6 | 70.1               | 66.6, 73.4 | 52.7              | 49.5, 55.9 |                      |
| <i>CAT</i>    | rs769214                        | G                                        | 37.6               | 35.3, 40.0 | 33.9               | 31.3, 36.6 | 41.2               | 39.4, 43.0 | 50.3              | 49.4, 51.2 | <0.001               |
|               |                                 | AA                                       | 39.5               | 36.3, 42.7 | 43.6               | 40.0, 47.2 | 35.0               | 32.5, 37.6 | 24.0              | 22.0, 26.1 |                      |
|               |                                 | AG                                       | 45.8               | 43.4, 48.2 | 45.0               | 42.5, 47.6 | 47.6               | 44.8, 50.3 | 51.5              | 47.4, 55.5 | <0.001               |
|               |                                 | GG                                       | 14.8               | 13.0, 16.7 | 11.4               | 9.4, 13.7  | 17.4               | 15.6, 19.4 | 24.6              | 22.3, 27.0 |                      |
| <i>CBS</i>    | 844ins68bp                      | +                                        | 10.0               | 8.9, 11.1  | 8.1                | 7.1, 9.2   | 25.9               | 23.8, 28.1 | 6.3               | 5.6, 7.2   | <0.001               |
|               |                                 | ++                                       | 1.2                | 0.9, 1.5   | 0.5                | 0.3, 0.8   | 6.7                | 5.4, 8.4   | 0.4               | 0.2, 0.8   |                      |
|               |                                 | +-                                       | 17.6               | 15.7, 19.7 | 15.3               | 13.3, 17.5 | 38.3               | 35.9, 40.7 | 11.9              | 10.3, 13.7 | <0.001               |
|               |                                 | --                                       | 81.2               | 79.1, 83.3 | 84.3               | 82.1, 86.2 | 55.0               | 51.8, 58.1 | 87.7              | 86.0, 89.3 |                      |
| <i>CCL5</i>   | rs2280788                       | G                                        | 2.6                | 2.3, 3.0   | 2.8                | 2.5, 3.2   | 0.7                | 0.4, 1.1   | 1.3               | 1.0, 1.7   | <0.001               |
|               |                                 | CC                                       | 94.9               | 94.2, 95.5 | 94.6               | 93.9, 95.2 | 98.7               | 97.8, 99.2 | 97.4              | 96.6, 98.0 |                      |
|               |                                 | CG                                       | 5.0                | 4.4, 5.6   | 5.2                | 4.6, 5.9   | 1.3                | 0.8, 2.2   | 2.6               | 2.0, 3.4   | <0.001               |
|               |                                 | GG                                       | 0.1                | 0.0, 0.4   | 0.2                | 0.1, 0.5   | 0.0                | NA         | 0.0               | NA         |                      |
| <i>CCR2</i>   | rs1799864                       | A                                        | 11.2               | 10.1, 12.6 | 9.5                | 8.1, 11.1  | 14.5               | 13.6, 15.4 | 21.7              | 19.8, 23.7 | <0.001               |
|               |                                 | AA                                       | 1.6                | 1.0, 2.4   | 1.2                | 0.6, 2.2   | 1.7                | 1.1, 2.4   | 4.5               | 3.3, 6.2   |                      |
|               |                                 | AG                                       | 19.3               | 17.4, 21.4 | 16.5               | 14.1, 19.3 | 25.7               | 24.0, 27.4 | 34.4              | 32.1, 36.6 | <0.001               |
|               |                                 | GG                                       | 79.1               | 76.9, 81.2 | 82.3               | 79.4, 84.8 | 72.7               | 71.0, 74.3 | 61.1              | 58.2, 63.9 |                      |
| <i>CXCL12</i> | rs169097                        | T                                        | 2.5                | 1.9, 3.2   | 0.3 <sup>e</sup>   | 0.2, 0.6   | 17.2               | 15.2, 19.3 | 1.0               | 0.6, 1.4   | <0.001               |
|               |                                 | CC                                       | 95.4               | 94.1, 96.4 | 99.4 <sup>e</sup>  | 98.9, 99.7 | 68.4               | 64.7, 71.9 | 98.1              | 97.1, 98.7 |                      |
|               |                                 | CT                                       | 4.3                | 3.4, 5.5   | 0.6                | 0.3, 1.1   | 28.9               | 25.7, 32.4 | 1.9               | 1.3, 2.9   | <0.001               |
|               |                                 | TT                                       | 0.3                | 0.2, 0.5   | 0.0                | 0.0, 0.1   | 2.7                | 1.9, 3.8   | 0.0               | NA         |                      |

| Gene symbol   | Variant (dbSNP ID) <sup>a</sup> | Minor Allele <sup>b</sup> /All Genotypes | Total <sup>c</sup> |            | Non-Hispanic white |            | Non-Hispanic black |            | Mexican- American |            | P value <sup>d</sup> |
|---------------|---------------------------------|------------------------------------------|--------------------|------------|--------------------|------------|--------------------|------------|-------------------|------------|----------------------|
|               |                                 |                                          | %                  | 95% CI     | %                  | 95% CI     | %                  | 95% CI     | %                 | 95% CI     |                      |
| <i>CYP1A1</i> | rs2472299                       | T                                        | 29.8               | 28.4, 31.3 | 28.2               | 26.7, 29.7 | 38.5               | 36.3, 40.7 | 26.7              | 24.6, 28.9 | <0.001               |
|               |                                 | CC                                       | 50.2               | 47.8, 52.5 | 52.8               | 50.6, 55.0 | 37.7               | 34.7, 40.7 | 53.9              | 50.3, 57.4 |                      |
|               |                                 | CT                                       | 40.0               | 37.7, 42.3 | 37.9               | 35.8, 40.0 | 47.8               | 45.3, 50.2 | 38.8              | 35.7, 42.0 | <0.001               |
|               |                                 | TT                                       | 9.9                | 8.8, 11.0  | 9.3                | 7.9, 10.8  | 14.6               | 12.8, 16.6 | 7.3               | 6.0, 8.8   |                      |
|               | rs2606345                       | G                                        | 44.0               | 41.7, 46.3 | 33.8               | 31.8, 35.8 | 84.1               | 81.3, 86.5 | 61.7              | 59.1, 64.2 | <0.001               |
|               |                                 | GG                                       | 22.6               | 20.5, 24.8 | 11.2               | 9.2, 13.6  | 70.8               | 65.8, 75.3 | 38.4              | 34.4, 42.6 |                      |
|               |                                 | GT                                       | 42.8               | 40.1, 45.5 | 45.1               | 41.8, 48.5 | 26.6               | 22.4, 31.3 | 46.5              | 42.5, 50.6 | <0.001               |
|               |                                 | TT                                       | 34.6               | 31.6, 37.8 | 43.7               | 40.7, 46.7 | 2.6                | 2.1, 3.4   | 15.1              | 13.1, 17.2 |                      |
| <i>CYP1A2</i> | rs11854147                      | T                                        | 40.4               | 38.1, 42.8 | 31.4 <sup>e</sup>  | 29.6, 33.1 | 72.1               | 70.3, 73.9 | 61.3              | 57.7, 64.9 | <0.001               |
|               |                                 | CC                                       | 39.5               | 36.8, 42.2 | 49.1 <sup>e</sup>  | 46.9, 51.4 | 8.6                | 7.1, 10.4  | 16.5              | 13.3, 20.2 |                      |
|               |                                 | CT                                       | 40.1               | 38.6, 41.7 | 39.0               | 37.2, 40.8 | 38.6               | 36.8, 40.5 | 44.4              | 41.0, 47.8 | <0.001               |
|               |                                 | TT                                       | 20.4               | 18.2, 22.7 | 11.9               | 10.3, 13.6 | 52.8               | 50.5, 55.1 | 39.1              | 34.8, 43.7 |                      |
|               | rs2069514                       | A                                        | 8.4                | 7.0, 10.0  | 1.6                | 1.0, 2.5   | 26.3               | 24.9, 27.7 | 33.7              | 30.2, 37.4 | <0.001               |
|               |                                 | AA                                       | 2.2                | 1.7, 2.9   | 0.1                | 0.0, 0.8   | 6.3                | 5.3, 7.5   | 12.2              | 9.3, 15.9  |                      |
|               |                                 | AG                                       | 12.4               | 10.2, 15.0 | 2.9                | 1.8, 4.7   | 39.9               | 36.8, 43.1 | 42.9              | 39.3, 46.6 | <0.001               |
|               |                                 | GG                                       | 85.4               | 82.6, 87.9 | 96.9               | 95.2, 98.1 | 53.8               | 51.0, 56.5 | 44.9              | 40.3, 49.6 |                      |
|               | rs4886406                       | G                                        | 29.4               | 28.1, 30.7 | 27.8               | 26.5, 29.2 | 38.3               | 36.0, 40.8 | 26.5              | 24.7, 28.5 | <0.001               |
|               |                                 | GG                                       | 9.0                | 7.9, 10.2  | 8.4                | 7.1, 9.8   | 13.9               | 12.1, 16.0 | 7.2               | 5.8, 9.0   |                      |
|               |                                 | GT                                       | 40.9               | 38.9, 42.9 | 38.9               | 37.1, 40.8 | 48.8               | 45.9, 51.8 | 38.6              | 36.2, 41.1 | 0.001                |
|               |                                 | TT                                       | 50.1               | 48.1, 52.2 | 52.7               | 50.9, 54.6 | 37.2               | 33.8, 40.8 | 54.1              | 51.4, 56.9 |                      |
| <i>CYP1B1</i> | rs1056836                       | G                                        | 46.0               | 44.1, 47.8 | 45.2               | 43.6, 46.8 | 75.0               | 73.5, 76.5 | 26.5              | 24.3, 28.9 | <0.001               |
|               |                                 | CC                                       | 31.3               | 29.6, 33.0 | 30.7               | 29.1, 32.4 | 5.9                | 4.8, 7.3   | 55.3              | 52.0, 58.4 |                      |
|               |                                 | CG                                       | 45.5               | 43.1, 47.9 | 48.2               | 45.2, 51.1 | 38.2               | 35.8, 40.7 | 36.4              | 34.2, 38.7 | <0.001               |
|               |                                 | GG                                       | 23.2               | 20.7, 26.0 | 21.1               | 18.7, 23.8 | 55.9               | 53.5, 58.3 | 8.3               | 6.9, 10.1  |                      |
|               | rs1056837                       | T                                        | 45.5               | 43.7, 47.3 | 45.0               | 43.3, 46.7 | 72.7               | 71.0, 74.3 | 26.3              | 24.0, 28.8 | <0.001               |
|               |                                 | CC                                       | 31.7               | 30.0, 33.5 | 31.0               | 29.2, 32.9 | 7.2                | 6.0, 8.8   | 55.9              | 52.8, 59.0 |                      |
|               |                                 | CT                                       | 45.5               | 43.1, 48.0 | 47.9               | 44.9, 50.9 | 40.1               | 37.1, 43.1 | 35.5              | 33.7, 37.4 | <0.001               |
|               |                                 | TT                                       | 22.7               | 20.3, 25.4 | 21.0               | 18.5, 23.7 | 52.6               | 49.8, 55.5 | 8.6               | 6.7, 10.8  |                      |
|               | rs162557                        | T                                        | 21.4               | 19.8, 23.1 | 23.2               | 21.3, 25.2 | 21.6               | 20.0, 23.4 | 13.1              | 11.6, 14.7 | <0.001               |
|               |                                 | CC                                       | 62.1               | 59.7, 64.4 | 59.2               | 56.5, 61.7 | 61.2               | 58.1, 64.2 | 75.6              | 72.6, 78.4 | <0.001               |
|               |                                 | CT                                       | 33.1               | 31.3, 34.9 | 35.2               | 33.4, 37.0 | 34.2               | 31.2, 37.5 | 22.6              | 20.0, 25.5 |                      |

| Gene symbol    | Variant (dbSNP ID) <sup>a</sup> | Minor Allele <sup>b</sup> /All Genotypes | Total <sup>c</sup> |            | Non-Hispanic white |            | Non-Hispanic black |            | Mexican- American |            | P value <sup>d</sup> |
|----------------|---------------------------------|------------------------------------------|--------------------|------------|--------------------|------------|--------------------|------------|-------------------|------------|----------------------|
|                |                                 |                                          | %                  | 95% CI     | %                  | 95% CI     | %                  | 95% CI     | %                 | 95% CI     |                      |
|                |                                 | TT                                       | 4.8                | 3.7, 6.3   | 5.6                | 4.2, 7.4   | 4.5                | 3.5, 5.9   | 1.7               | 1.2, 2.5   |                      |
| <i>CYP2A6</i>  | rs1801272                       | A                                        | 2.7                | 2.4, 3.1   | 3.3                | 2.8, 3.8   | 0.6                | 0.4, 0.9   | 2.0               | 1.6, 2.5   | <0.001               |
|                |                                 | AA                                       | 0.1                | 0.0, 0.3   | 0.1                | 0.0, 0.3   | 0.0                | NA         | 0.0               | 0.0, 0.3   |                      |
|                |                                 | AT                                       | 5.3                | 4.7, 6.1   | 6.4                | 5.5, 7.4   | 1.2                | 0.8, 1.8   | 3.9               | 3.2, 4.8   | <0.001               |
|                |                                 | TT                                       | 94.6               | 93.8, 95.3 | 93.5               | 92.5, 94.5 | 98.8               | 98.2, 99.2 | 96.0              | 95.1, 96.8 |                      |
| <i>CYP2C19</i> | rs4986893                       | A                                        | 0.2                | 0.1, 0.5   | 0.1                | 0.1, 0.2   | 0.2                | 0.1, 0.4   | 0.1               | 0.0, 0.3   | 0.744                |
|                |                                 | AA                                       | 0.0                | 0.0, 0.1   | 0.0                | NA         | 0.0                | NA         | 0.0               | NA         |                      |
|                |                                 | AG                                       | 0.4                | 0.2, 0.9   | 0.2                | 0.1, 0.5   | 0.3                | 0.1, 0.8   | 0.2               | 0.1, 0.5   | 0.830                |
|                |                                 | GG                                       | 99.6               | 99.1, 99.8 | 99.8               | 99.5, 99.9 | 99.7               | 99.2, 99.9 | 99.8              | 99.5, 99.9 |                      |
|                | rs4986894                       | C                                        | 14.8               | 13.8, 15.7 | 13.7               | 12.5, 14.9 | 18.3               | 17.0, 19.7 | 11.0              | 9.2, 13.1  | <0.001               |
|                |                                 | CC                                       | 2.3                | 1.9, 2.8   | 1.9                | 1.4, 2.6   | 3.8                | 2.8, 5.0   | 1.3               | 0.7, 2.3   |                      |
|                |                                 | CT                                       | 25.0               | 23.4, 26.6 | 23.6               | 21.7, 25.7 | 29.1               | 26.5, 32.0 | 19.5              | 16.6, 22.7 | <0.001               |
| TT             | 72.7                            | 71.0, 74.4                               | 74.5               | 72.3, 76.6 | 67.1               | 64.6, 69.5 | 79.2               | 75.6, 82.4 |                   |            |                      |
| <i>CYP2C9</i>  | rs1057910                       | C                                        | 5.8                | 5.2, 6.4   | 6.8                | 6.0, 7.6   | 1.1                | 0.6, 1.8   | 3.9               | 3.1, 4.9   | <0.001               |
|                |                                 | AA                                       | 89.0               | 87.9, 90.1 | 87.1               | 85.4, 88.5 | 97.9               | 96.5, 98.7 | 92.4              | 90.4, 93.9 |                      |
|                |                                 | AC                                       | 10.4               | 9.4, 11.5  | 12.3               | 10.9, 14.0 | 2.0                | 1.2, 3.4   | 7.5               | 6.0, 9.4   | <0.001               |
|                |                                 | CC                                       | 0.6                | 0.4, 0.9   | 0.6                | 0.4, 0.9   | 0.0                | 0.0, 0.3   | 0.1               | 0.0, 0.4   |                      |
| <i>CYP2E1</i>  | rs2031920                       | T                                        | 3.1                | 2.6, 3.8   | 2.2                | 1.7, 3.0   | 0.8                | 0.5, 1.1   | 10.7              | 9.6, 11.8  | <0.001               |
|                |                                 | CC                                       | 94.0               | 92.7, 95.0 | 95.6               | 94.2, 96.8 | 98.5               | 97.8, 98.9 | 79.7              | 77.4, 81.8 |                      |
|                |                                 | CT                                       | 5.8                | 4.8, 7.0   | 4.2                | 3.1, 5.8   | 1.5                | 1.1, 2.2   | 19.3              | 16.9, 21.9 | <0.001               |
|                |                                 | TT                                       | 0.3                | 0.1, 0.5   | 0.1                | 0.0, 0.4   | 0.0                | NA         | 1.0               | 0.5, 2.0   |                      |
| <i>CYP3A4</i>  | rs2740574                       | G                                        | 11.7               | 9.9, 13.7  | 4.1                | 3.4, 4.9   | 64.0               | 62.0, 66.0 | 7.7               | 6.3, 9.3   | <0.001               |
|                |                                 | AA                                       | 82.0               | 79.3, 84.4 | 92.4               | 90.9, 93.6 | 13.7               | 12.0, 15.6 | 85.4              | 82.7, 87.8 |                      |
|                |                                 | AG                                       | 12.6               | 11.1, 14.3 | 7.1                | 5.8, 8.7   | 44.5               | 42.4, 46.6 | 13.8              | 11.7, 16.3 | <0.001               |
|                |                                 | GG                                       | 5.4                | 4.2, 6.9   | 0.5                | 0.2, 1.4   | 41.8               | 39.2, 44.4 | 0.8               | 0.4, 1.4   |                      |
| <i>F2</i>      | rs1799963                       | A                                        | 1.0                | 0.7, 1.3   | 1.1                | 0.8, 1.7   | 0.3                | 0.1, 0.5   | 1.1               | 0.7, 1.7   | 0.001                |
|                |                                 | AA                                       | 0.0                | NA         | 0.0                | NA         | 0.0                | NA         | 0.0               | NA         | 0.001                |

| Gene symbol   | Variant (dbSNP ID) <sup>a</sup> | Minor Allele <sup>b</sup> /All Genotypes | Total <sup>c</sup> |            | Non-Hispanic white |            | Non-Hispanic black |            | Mexican- American |            | P value <sup>d</sup> |
|---------------|---------------------------------|------------------------------------------|--------------------|------------|--------------------|------------|--------------------|------------|-------------------|------------|----------------------|
|               |                                 |                                          | %                  | 95% CI     | %                  | 95% CI     | %                  | 95% CI     | %                 | 95% CI     |                      |
|               |                                 | AG                                       | 1.9                | 1.4, 2.7   | 2.3                | 1.5, 3.4   | 0.5                | 0.3, 1.1   | 2.2               | 1.5, 3.4   |                      |
|               |                                 | GG                                       | 98.1               | 97.3, 98.6 | 97.7               | 96.6, 98.5 | 99.5               | 98.9, 99.7 | 97.8              | 96.6, 98.5 |                      |
| <i>F5</i>     | rs6025                          | A                                        | 2.2                | 1.8, 2.7   | 2.6                | 2.1, 3.2   | 0.6                | 0.4, 1.0   | 1.0               | 0.8, 1.4   | <0.001               |
|               |                                 | AA                                       | 0.0                | 0.0, 0.1   | 0.0                | 0.0, 0.1   | 0.0                | NA         | 0.0               | 0.0, 0.3   |                      |
|               |                                 | AG                                       | 4.3                | 3.5, 5.3   | 5.2                | 4.2, 6.3   | 1.3                | 0.8, 2.1   | 2.0               | 1.4, 2.8   | <0.001               |
|               |                                 | GG                                       | 95.7               | 94.6, 96.5 | 94.8               | 93.7, 95.8 | 98.7               | 97.9, 99.2 | 98.0              | 97.2, 98.5 |                      |
| <i>FAM82A</i> | rs163086                        | T                                        | 21.3               | 20.0, 22.6 | 22.8               | 21.2, 24.5 | 19.1               | 17.4, 21.0 | 14.5              | 13.0, 16.3 | <0.001               |
|               |                                 | CC                                       | 62.3               | 60.2, 64.2 | 59.8               | 57.0, 62.6 | 65.0               | 62.1, 67.8 | 73.4              | 70.6, 76.0 |                      |
|               |                                 | CT                                       | 32.9               | 31.2, 34.8 | 34.7               | 32.0, 37.5 | 31.7               | 29.3, 34.2 | 24.1              | 21.9, 26.4 | <0.001               |
|               |                                 | TT                                       | 4.8                | 3.9, 5.9   | 5.5                | 4.3, 6.9   | 3.3                | 2.3, 4.6   | 2.5               | 1.8, 3.4   |                      |
| <i>FCGR2A</i> | rs1801274                       | A                                        | 50.0               | 48.5, 51.6 | 49.4               | 47.6, 51.1 | 47.4               | 45.8, 49.0 | 48.6              | 47.1, 50.1 | 0.096                |
|               |                                 | AA                                       | 25.6               | 23.9, 27.3 | 24.9               | 23.0, 26.9 | 21.8               | 20.2, 23.5 | 23.7              | 22.1, 25.4 |                      |
|               |                                 | AG                                       | 48.9               | 47.4, 50.5 | 48.9               | 46.8, 51.1 | 51.3               | 49.5, 53.1 | 49.8              | 47.1, 52.5 | 0.127                |
|               |                                 | GG                                       | 25.5               | 23.8, 27.2 | 26.2               | 24.1, 28.4 | 26.9               | 25.0, 29.0 | 26.5              | 24.3, 28.8 |                      |
| <i>FGB</i>    | rs1800790                       | A                                        | 17.6               | 16.2, 19.1 | 19.4               | 18.1, 20.7 | 5.5                | 4.6, 6.6   | 15.0              | 13.5, 16.6 | <0.001               |
|               |                                 | AA                                       | 3.3                | 2.4, 4.4   | 3.4                | 2.6, 4.5   | 0.6                | 0.3, 1.3   | 2.5               | 2.0, 3.1   |                      |
|               |                                 | AG                                       | 28.7               | 26.8, 30.7 | 31.9               | 30.1, 33.8 | 9.8                | 8.0, 11.9  | 24.9              | 22.3, 27.8 | <0.001               |
|               |                                 | GG                                       | 68.0               | 65.7, 70.2 | 64.6               | 62.6, 66.6 | 89.6               | 87.5, 91.3 | 72.6              | 69.6, 75.4 |                      |
| <i>IL10</i>   | rs1800871                       | T                                        | 29.0               | 27.1, 30.9 | 24.2               | 22.3, 26.2 | 39.6               | 37.8, 41.5 | 38.1              | 34.7, 41.6 | <0.001               |
|               |                                 | CC                                       | 52.2               | 49.5, 54.8 | 58.4               | 55.6, 61.1 | 36.3               | 33.5, 39.3 | 39.2              | 35.2, 43.4 |                      |
|               |                                 | CT                                       | 37.7               | 35.3, 40.3 | 34.9               | 32.4, 37.5 | 48.1               | 45.3, 50.9 | 45.4              | 43.2, 47.6 | <0.001               |
|               |                                 | TT                                       | 10.1               | 8.4, 12.0  | 6.7                | 5.1, 8.9   | 15.6               | 14.0, 17.2 | 15.4              | 12.5, 18.8 |                      |
|               | rs1800872                       | A                                        | 29.0               | 27.1, 31.0 | 24.3               | 22.4, 26.4 | 39.3               | 37.4, 41.2 | 37.9              | 34.6, 41.4 | <0.001               |
|               |                                 | AA                                       | 10.1               | 8.4, 12.1  | 6.9                | 5.1, 9.2   | 15.0               | 13.4, 16.8 | 15.1              | 12.3, 18.5 |                      |
|               |                                 | AC                                       | 37.9               | 35.3, 40.5 | 35.0               | 32.3, 37.7 | 48.5               | 45.4, 51.6 | 45.6              | 43.0, 48.3 | <0.001               |
|               |                                 | CC                                       | 52.1               | 49.4, 54.8 | 58.2               | 55.4, 60.9 | 36.5               | 33.5, 39.5 | 39.3              | 35.2, 43.4 |                      |
| rs1800896     | G                               | 42.3                                     | 40.6, 44.0         | 46.9       | 44.5, 49.3         | 35.6       | 33.8, 37.5         | 30.5       | 27.8, 33.3        | <0.001     |                      |
|               | AA                              | 34.4                                     | 32.3, 36.6         | 28.6       | 25.6, 31.8         | 40.6       | 37.4, 43.8         | 48.7       | 43.9, 53.4        | <0.001     |                      |

| Gene symbol  | Variant (dbSNP ID) <sup>a</sup> | Minor Allele <sup>b</sup> /All Genotypes | Total <sup>c</sup> |            | Non-Hispanic white |            | Non-Hispanic black |            | Mexican- American |            | P value <sup>d</sup> |
|--------------|---------------------------------|------------------------------------------|--------------------|------------|--------------------|------------|--------------------|------------|-------------------|------------|----------------------|
|              |                                 |                                          | %                  | 95% CI     | %                  | 95% CI     | %                  | 95% CI     | %                 | 95% CI     |                      |
|              |                                 | AG                                       | 46.6               | 44.3, 48.9 | 49.0               | 46.4, 51.6 | 47.6               | 44.3, 50.9 | 41.7              | 37.0, 46.5 |                      |
|              |                                 | GG                                       | 19.0               | 17.2, 20.9 | 22.4               | 20.1, 24.8 | 11.8               | 10.4, 13.4 | 9.6               | 7.8, 11.8  |                      |
| <i>IL1B</i>  | rs1143623                       | C                                        | 28.7               | 26.5, 31.0 | 28.5               | 26.0, 31.1 | 11.2               | 10.0, 12.7 | 42.9              | 40.5, 45.4 | <0.001               |
|              |                                 | CC                                       | 9.6                | 7.9, 11.6  | 9.0                | 7.2, 11.1  | 1.1                | 0.6, 1.9   | 19.4              | 16.9, 22.2 |                      |
|              |                                 | CG                                       | 38.1               | 36.4, 39.9 | 39.1               | 36.8, 41.4 | 20.3               | 18.4, 22.3 | 47.1              | 44.1, 50.2 | <0.001               |
|              |                                 | GG                                       | 52.2               | 49.4, 55.0 | 52.0               | 48.5, 55.4 | 78.6               | 76.3, 80.8 | 33.5              | 30.4, 36.8 |                      |
| <i>IL4</i>   | rs2243248                       | G                                        | 9.0                | 8.1, 9.9   | 7.5                | 6.7, 8.4   | 15.7               | 14.3, 17.3 | 12.0              | 10.0, 14.4 | <0.001               |
|              |                                 | GG                                       | 0.8                | 0.6, 1.1   | 0.4                | 0.2, 0.8   | 2.5                | 1.7, 3.5   | 1.9               | 1.3, 2.8   |                      |
|              |                                 | GT                                       | 16.3               | 14.8, 18.0 | 14.1               | 12.7, 15.7 | 26.6               | 24.3, 29.0 | 20.3              | 17.1, 23.9 | <0.001               |
|              |                                 | TT                                       | 82.9               | 81.1, 84.5 | 85.4               | 83.7, 87.0 | 71.0               | 68.3, 73.5 | 77.8              | 73.7, 81.4 |                      |
|              | rs2243250                       | T                                        | 25.5               | 23.8, 27.3 | 16.0               | 14.8, 17.3 | 64.0               | 62.1, 65.8 | 42.3              | 40.2, 44.4 | <0.001               |
|              |                                 | CC                                       | 58.9               | 56.6, 61.1 | 70.8               | 68.9, 72.6 | 14.1               | 12.3, 16.2 | 34.3              | 30.9, 37.8 |                      |
|              |                                 | CT                                       | 31.2               | 29.6, 32.9 | 26.4               | 24.9, 28.0 | 43.8               | 41.0, 46.7 | 46.9              | 43.3, 50.5 | <0.001               |
|              |                                 | TT                                       | 9.9                | 8.6, 11.4  | 2.8                | 2.0, 4.0   | 42.0               | 39.4, 44.7 | 18.9              | 17.1, 20.7 |                      |
|              | rs2243270                       | G                                        | 25.7               | 24.0, 27.6 | 16.4               | 15.2, 17.6 | 63.7               | 61.9, 65.4 | 41.8              | 39.3, 44.3 | <0.001               |
|              |                                 | AA                                       | 58.3               | 55.9, 60.7 | 69.9               | 68.1, 71.7 | 14.5               | 13.4, 15.8 | 34.9              | 31.5, 38.6 |                      |
|              |                                 | AG                                       | 31.8               | 30.1, 33.6 | 27.4               | 25.8, 29.1 | 43.5               | 40.4, 46.7 | 46.6              | 43.3, 49.9 | <0.001               |
|              |                                 | GG                                       | 9.8                | 8.4, 11.4  | 2.6                | 1.8, 3.8   | 41.9               | 38.9, 45.0 | 18.5              | 16.2, 21.0 |                      |
| <i>IL4R</i>  | rs1801275                       | G                                        | 26.8               | 24.8, 28.9 | 20.8               | 19.5, 22.1 | 67.1 <sup>e</sup>  | 64.8, 69.3 | 28.6              | 26.8, 30.6 | <0.001               |
|              |                                 | AA                                       | 55.9               | 53.1, 58.6 | 62.7               | 60.8, 64.6 | 13.1 <sup>e</sup>  | 11.4, 15.1 | 51.4              | 49.2, 53.6 |                      |
|              |                                 | AG                                       | 34.7               | 32.8, 36.5 | 33.1               | 31.5, 34.6 | 39.5               | 37.1, 42.0 | 39.8              | 38.2, 41.5 | <0.001               |
|              |                                 | GG                                       | 9.5                | 8.0, 11.2  | 4.2                | 3.3, 5.4   | 47.3               | 44.2, 50.4 | 8.7               | 6.9, 10.9  |                      |
|              | rs1805015                       | C                                        | 17.8               | 16.4, 19.3 | 15.7               | 14.2, 17.3 | 36.7               | 34.9, 38.7 | 15.7              | 14.1, 17.4 | <0.001               |
|              |                                 | CC                                       | 3.5                | 2.9, 4.4   | 2.4                | 1.7, 3.3   | 12.7               | 11.1, 14.6 | 2.9               | 2.0, 4.1   |                      |
|              |                                 | CT                                       | 28.6               | 26.7, 30.5 | 26.7               | 24.8, 28.7 | 48.0               | 45.9, 50.1 | 25.7              | 23.3, 28.2 | <0.001               |
|              |                                 | TT                                       | 67.9               | 65.5, 70.2 | 71.0               | 68.5, 73.3 | 39.3               | 36.8, 41.8 | 71.4              | 68.7, 74.1 |                      |
| <i>ITGA2</i> | rs1126643                       | T                                        | 39.7               | 38.2, 41.2 | 41.2               | 39.1, 43.3 | 29.6               | 27.3, 32.0 | 44.6              | 43.1, 46.2 | <0.001               |
|              |                                 | CC                                       | 36.5               | 35.1, 37.9 | 34.7               | 32.8, 36.6 | 48.5               | 45.3, 51.8 | 30.3              | 28.3, 32.4 | <0.001               |
|              |                                 | CT                                       | 47.6               | 46.2, 49.1 | 48.3               | 46.3, 50.3 | 43.7               | 41.3, 46.0 | 50.1              | 47.9, 52.3 |                      |

| Gene symbol  | Variant (dbSNP ID) <sup>a</sup> | Minor Allele <sup>b</sup> /All Genotypes | Total <sup>c</sup> |            | Non-Hispanic white |            | Non-Hispanic black |                   | Mexican- American |            | P value <sup>d</sup> |
|--------------|---------------------------------|------------------------------------------|--------------------|------------|--------------------|------------|--------------------|-------------------|-------------------|------------|----------------------|
|              |                                 |                                          | %                  | 95% CI     | %                  | 95% CI     | %                  | 95% CI            | %                 | 95% CI     |                      |
|              |                                 | TT                                       | 15.9               | 14.1, 17.9 | 17.0               | 14.5, 19.8 | 7.8                | 6.1, 9.8          | 19.6              | 17.9, 21.3 |                      |
| <i>ITGB3</i> | rs5918                          | C                                        | 14.4               | 13.3, 15.6 | 16.3               | 15.0, 17.6 | 10.1               | 9.2, 11.0         | 9.7               | 8.2, 11.3  | <0.001               |
|              |                                 | CC                                       | 2.2                | 1.5, 3.3   | 2.7                | 1.8, 4.0   | 1.1                | 0.7, 1.7          | 1.3               | 0.8, 2.1   |                      |
|              |                                 | CT                                       | 24.4               | 22.7, 26.2 | 27.2               | 25.1, 29.4 | 18.0               | 16.3, 19.8        | 16.8              | 14.8, 19.0 | <0.001               |
|              |                                 | TT                                       | 73.4               | 71.4, 75.2 | 70.1               | 67.9, 72.2 | 81.0               | 79.2, 82.6        | 81.9              | 79.2, 84.4 |                      |
| <i>MBL2</i>  | rs11003125                      | G                                        | 34.9               | 33.2, 36.7 | 36.4               | 34.7, 38.1 | 12.8               | 11.7, 14.0        | 51.0              | 48.9, 53.1 | <0.001               |
|              |                                 | CC                                       | 43.2               | 41.0, 45.4 | 40.9               | 38.6, 43.2 | 76.2               | 73.9, 78.3        | 25.0              | 22.3, 27.8 |                      |
|              |                                 | CG                                       | 43.8               | 41.3, 46.2 | 45.6               | 42.5, 48.6 | 21.9               | 19.8, 24.3        | 48.1              | 46.3, 50.0 | <0.001               |
|              |                                 | GG                                       | 13.1               | 11.2, 15.2 | 13.6               | 11.4, 16.1 | 1.9                | 1.3, 2.7          | 26.9              | 25.2, 28.7 |                      |
|              | rs1800450                       | A                                        | 13.5               | 12.3, 14.7 | 14.6               | 13.1, 16.2 | 4.0                | 3.3, 4.9          | 14.6              | 12.9, 16.6 | <0.001               |
|              |                                 | AA                                       | 2.4                | 1.9, 3.1   | 2.8                | 2.1, 3.7   | 0.4                | 0.2, 0.8          | 2.0               | 1.3, 3.2   |                      |
|              |                                 | AG                                       | 22.1               | 20.3, 24.0 | 23.5               | 21.1, 26.1 | 7.4                | 6.0, 9.0          | 25.1              | 22.8, 27.6 | <0.001               |
|              |                                 | GG                                       | 75.5               | 73.4, 77.5 | 73.7               | 70.8, 76.3 | 92.3               | 90.6, 93.6        | 72.8              | 69.7, 75.7 |                      |
|              | rs1800451                       | A                                        | 4.6                | 3.9, 5.5   | 2.0                | 1.6, 2.4   | 23.3               | 21.7, 25.0        | 2.5               | 1.9, 3.3   | <0.001               |
|              |                                 | AA                                       | 0.8                | 0.6, 1.2   | 0.1                | 0.0, 0.3   | 6.1                | 4.6, 7.9          | 0.0               | NA         |                      |
|              |                                 | AG                                       | 7.6                | 6.3, 9.2   | 3.8                | 3.1, 4.7   | 34.4               | 32.3, 36.7        | 5.1               | 3.9, 6.6   | <0.001               |
|              |                                 | GG                                       | 91.6               | 90.0, 93.0 | 96.1               | 95.2, 96.9 | 59.5               | 57.2, 61.8        | 94.9              | 93.4, 96.1 |                      |
|              | rs5030737                       | T                                        | 6.1                | 5.3, 7.1   | 7.4                | 6.4, 8.5   | 1.1                | 0.8, 1.5          | 2.9 <sup>e</sup>  | 2.4, 3.5   | <0.001               |
|              |                                 | CC                                       | 88.3               | 86.5, 89.9 | 85.9               | 83.7, 87.9 | 97.7               | 97.0, 98.3        | 94.4 <sup>e</sup> | 93.2, 95.3 |                      |
|              |                                 | CT                                       | 11.1               | 9.6, 12.9  | 13.3               | 11.3, 15.6 | 2.3                | 1.7, 3.0          | 5.5               | 4.6, 6.5   | <0.001               |
|              |                                 | TT                                       | 0.6                | 0.3, 1.0   | 0.8                | 0.4, 1.3   | 0.0                | NA                | 0.2               | 0.1, 0.4   |                      |
| rs7096206    | C                               | 20.4                                     | 18.9, 22.0         | 22.4       | 20.4, 24.5         | 15.1       | 13.7, 16.7         | 11.4 <sup>e</sup> | 9.5, 13.5         | <0.001     |                      |
|              | CC                              | 4.4                                      | 3.6, 5.3           | 5.2        | 4.1, 6.5           | 2.2        | 1.6, 3.0           | 2.2 <sup>e</sup>  | 1.5, 3.4          |            |                      |
|              | CG                              | 32.0                                     | 29.7, 34.4         | 34.4       | 31.2, 37.6         | 25.8       | 23.3, 28.5         | 18.3              | 15.8, 21.1        | <0.001     |                      |
|              | GG                              | 63.6                                     | 61.0, 66.2         | 60.4       | 56.9, 63.8         | 71.9       | 69.1, 74.6         | 79.5              | 76.0, 82.5        |            |                      |
| <i>MTHFR</i> | rs1801131                       | C                                        | 28.4               | 26.1, 30.8 | 31.1               | 28.2, 34.1 | 17.9               | 16.9, 18.9        | 18.8              | 15.8, 22.2 | <0.001               |
|              |                                 | AA                                       | 52.2               | 48.8, 55.6 | 48.2               | 44.1, 52.4 | 67.6               | 65.9, 69.2        | 66.0              | 61.0, 70.6 |                      |
|              |                                 | AC                                       | 38.8               | 36.1, 41.5 | 41.3               | 38.2, 44.4 | 29.0               | 27.4, 30.7        | 30.5              | 27.2, 34.1 | <0.001               |
|              | CC                              | 9.0                                      | 7.4, 10.9          | 10.5       | 8.4, 12.9          | 3.4        | 2.7, 4.2           | 3.5               | 2.2, 5.6          |            |                      |
|              | rs1801133                       | T                                        | 30.8               | 28.8, 32.8 | 32.6               | 30.0, 35.2 | 11.6               | 10.8, 12.5        | 44.6              | 41.7, 47.5 | <0.001               |



| Gene symbol | Variant (dbSNP ID) <sup>a</sup> | Minor Allele <sup>b</sup> /All Genotypes | Total <sup>c</sup> |            | Non-Hispanic white |             | Non-Hispanic black |            | Mexican- American |            | P value <sup>d</sup> |
|-------------|---------------------------------|------------------------------------------|--------------------|------------|--------------------|-------------|--------------------|------------|-------------------|------------|----------------------|
|             |                                 |                                          | %                  | 95% CI     | %                  | 95% CI      | %                  | 95% CI     | %                 | 95% CI     |                      |
|             | rs2066470                       | CC                                       | 49.3               | 46.3, 52.4 | 46.4               | 42.5, 50.3  | 77.9               | 76.2, 79.5 | 30.7              | 27.5, 34.1 |                      |
|             |                                 | CT                                       | 39.8               | 37.2, 42.5 | 42.1               | 38.8, 45.5  | 20.9               | 19.2, 22.7 | 49.4              | 46.3, 52.5 | <0.001               |
|             |                                 | TT                                       | 10.9               | 9.4, 12.5  | 11.5               | 9.7, 13.5   | 1.2                | 0.7, 1.9   | 19.9              | 16.7, 23.5 |                      |
|             |                                 | T                                        | 9.7                | 8.5, 11.1  | 9.6                | 8.0, 11.4   | 8.7                | 7.6, 10.0  | 6.5               | 5.4, 7.8   | 0.042                |
|             |                                 | CC                                       | 81.9               | 79.4, 84.2 | 81.9               | 78.7, 84.8  | 83.5               | 81.2, 85.6 | 87.4              | 85.1, 89.5 |                      |
|             |                                 | CT                                       | 16.8               | 14.7, 19.2 | 17.0               | 14.4, 20.0  | 15.6               | 13.6, 17.8 | 12.1              | 10.1, 14.4 | 0.057                |
|             |                                 | TT                                       | 1.3                | 0.9, 1.7   | 1.1                | 0.6, 1.8    | 0.9                | 0.5, 1.6   | 0.5               | 0.2, 1.2   |                      |
| <i>MTRR</i> | rs1801394                       | G                                        | 46.9               | 45.3, 48.5 | 52.8               | 51.5, 54.1  | 28.7               | 26.7, 30.9 | 26.1              | 24.2, 28.0 | <0.001               |
|             |                                 | AA                                       | 29.8               | 27.7, 31.9 | 22.6               | 20.9, 24.4  | 50.7               | 47.8, 53.6 | 55.0              | 51.8, 58.1 |                      |
|             |                                 | AG                                       | 46.7               | 45.0, 48.5 | 49.1               | 47.1, 51.1  | 41.1               | 39.2, 43.1 | 37.9              | 34.7, 41.3 | <0.001               |
|             |                                 | GG                                       | 23.5               | 22.0, 25.0 | 28.3               | 26.7, 29.9  | 8.2                | 6.8, 9.8   | 7.1               | 5.7, 8.9   |                      |
| <i>NAT2</i> | rs1041983                       | T                                        | 36.4               | 35.0, 37.9 | 35.4               | 33.8, 37.1  | 46.1               | 44.6, 47.6 | 31.9              | 29.4, 34.4 | <0.001               |
|             |                                 | CC                                       | 40.4               | 38.4, 42.4 | 41.4               | 38.9, 43.9  | 30.8               | 28.9, 32.8 | 46.7              | 43.4, 50.1 |                      |
|             |                                 | CT                                       | 46.3               | 44.6, 48.1 | 46.3               | 43.8, 48.9  | 46.2               | 43.8, 48.5 | 42.8              | 40.1, 45.6 | <0.001               |
|             |                                 | TT                                       | 13.3               | 12.0, 14.7 | 12.3               | 10.8, 13.8  | 23.0               | 21.2, 24.9 | 10.5              | 8.4, 12.9  |                      |
|             | rs1208                          | G                                        | 39.4               | 38.5, 40.2 | 41.0               | 39.9, 42.3  | 38.3               | 36.9, 39.7 | 35.7              | 33.5, 37.9 | <0.001               |
|             |                                 | AA                                       | 37.2               | 35.9, 38.5 | 34.5               | 33.1, 36.0  | 39.3               | 37.3, 41.2 | 41.2              | 38.2, 44.4 |                      |
|             |                                 | AG                                       | 46.8               | 45.4, 48.2 | 48.9               | 47.3, 50.4  | 44.9               | 42.7, 47.2 | 46.2              | 43.5, 48.9 | <0.001               |
|             |                                 | GG                                       | 15.9               | 15.1, 16.8 | 16.6               | 15.2, 18.1  | 15.8               | 14.2, 17.5 | 12.6              | 10.8, 14.6 |                      |
|             | rs1799930                       | A                                        | 30.2               | 28.9, 31.5 | 32.3               | 30.5, 34.1  | 28.0               | 25.8, 30.3 | 18.0              | 16.0, 20.1 | <0.001               |
|             |                                 | AA                                       | 8.9                | 7.9, 10.1  | 10.1               | 8.7, 11.7   | 8.7                | 7.1, 10.5  | 3.2               | 2.2, 4.7   |                      |
|             |                                 | AG                                       | 42.6               | 40.8, 44.5 | 44.4               | 42.0, 46.7  | 38.6               | 35.6, 41.8 | 29.5              | 26.0, 33.2 | <0.001               |
|             |                                 | GG                                       | 48.5               | 46.5, 50.5 | 45.5               | 42.8, 48.2  | 52.7               | 49.2, 56.2 | 67.3              | 63.5, 70.9 |                      |
|             | rs1801279                       | A                                        | 1.0                | 0.8, 1.3   | 0.0                | 0.0, 0.1    | 7.8                | 6.9, 8.8   | 0.5 <sup>e</sup>  | 0.3, 0.9   | <0.001               |
|             |                                 | AA                                       | 0.0                | 0.0, 0.1   | 0.0                | NA          | 0.4                | 0.2, 0.9   | 0.0 <sup>e</sup>  | 0.0, 0.1   |                      |
|             |                                 | AG                                       | 2.0                | 1.5, 2.6   | 0.1                | 0.0, 0.3    | 14.9               | 13.1, 16.8 | 1.0               | 0.6, 1.8   | <0.001               |
|             |                                 | GG                                       | 98.0               | 97.4, 98.4 | 99.9               | 99.7, 100.0 | 84.7               | 82.8, 86.5 | 99.0              | 98.2, 99.4 |                      |
| rs1801280   | C                               | 38.9                                     | 37.8, 40.0         | 42.1       | 40.9, 43.3         | 29.3        | 27.7, 30.9         | 32.4       | 29.5, 35.3        | <0.001     |                      |
|             | CC                              | 15.7                                     | 14.5, 16.8         | 17.5       | 15.9, 19.2         | 9.1         | 7.8, 10.7          | 10.1       | 7.9, 12.9         |            |                      |
|             | CT                              | 46.5                                     | 44.7, 48.2         | 49.3       | 47.4, 51.3         | 40.3        | 37.5, 43.1         | 44.4       | 41.5, 47.4        | <0.001     |                      |
|             | TT                              | 37.9                                     | 36.2, 39.6         | 33.2       | 31.8, 34.7         | 50.6        | 48.0, 53.3         | 45.4       | 41.6, 49.3        |            |                      |

| Gene symbol  | Variant (dbSNP ID) <sup>a</sup> | Minor Allele <sup>b</sup> /All Genotypes | %          | Total <sup>c</sup> | Non-Hispanic white |             | Non-Hispanic black |            | Mexican- American |            | P value <sup>d</sup> |
|--------------|---------------------------------|------------------------------------------|------------|--------------------|--------------------|-------------|--------------------|------------|-------------------|------------|----------------------|
|              |                                 |                                          |            | %                  | 95% CI             | %           | 95% CI             | %          | 95% CI            | %          |                      |
| <i>NOS2A</i> | rs1800482                       | C                                        | 1.0        | 0.7, 1.3           | 0.1                | 0.0, 0.1    | 6.3                | 5.0, 7.8   | 0.3 <sup>e</sup>  | 0.1, 0.7   | <0.001               |
|              |                                 | CC                                       | 0.1        | 0.0, 0.1           | 0.0                | NA          | 0.5                | 0.3, 1.0   | 0.1 <sup>e</sup>  | 0.0, 0.7   |                      |
|              |                                 | CG                                       | 1.8        | 1.3, 2.5           | 0.1                | 0.0, 0.3    | 11.5               | 9.2, 14.2  | 0.4               | 0.2, 0.9   | <0.001               |
|              |                                 | GG                                       | 98.2       | 97.5, 98.7         | 99.9               | 99.7, 100.0 | 88.0               | 85.1, 90.4 | 99.5              | 98.9, 99.8 |                      |
|              | rs9282799                       | T                                        | 0.7        | 0.5, 0.9           | 0.0                | 0.0, 0.1    | 4.5                | 3.9, 5.1   | 0.4               | 0.2, 0.7   | <0.001               |
|              |                                 | CC                                       | 98.7       | 98.2, 99.1         | 99.9               | 99.7, 100.0 | 91.2               | 90.1, 92.3 | 99.2              | 98.5, 99.6 |                      |
|              |                                 | CT                                       | 1.3        | 0.9, 1.8           | 0.1                | 0.0, 0.3    | 8.5                | 7.5, 9.6   | 0.8               | 0.4, 1.5   | <0.001               |
| TT           | 0.0                             | 0.0, 0.1                                 | 0.0        | NA                 | 0.2                | 0.1, 0.6    | 0.0                | NA         |                   |            |                      |
| <i>NOS3</i>  | rs1799983                       | T                                        | 28.5       | 27.4, 29.7         | 32.5               | 30.7, 34.4  | 13.1               | 11.7, 14.7 | 19.6              | 17.7, 21.6 | <0.001               |
|              |                                 | GG                                       | 51.5       | 49.4, 53.6         | 45.5               | 42.4, 48.6  | 74.9               | 71.8, 77.7 | 65.0              | 61.6, 68.2 |                      |
|              |                                 | GT                                       | 39.9       | 37.6, 42.2         | 43.9               | 40.8, 47.1  | 24.0               | 21.2, 27.1 | 30.8              | 27.9, 33.9 | <0.001               |
|              |                                 | TT                                       | 8.6        | 7.7, 9.7           | 10.6               | 9.2, 12.1   | 1.1                | 0.7, 1.6   | 4.2               | 3.2, 5.4   |                      |
|              | rs2070744                       | C                                        | 34.2       | 32.2, 36.3         | 39.1               | 37.1, 41.1  | 15.1               | 13.8, 16.5 | 25.1              | 22.9, 27.5 | <0.001               |
|              |                                 | CC                                       | 12.6       | 11.1, 14.2         | 15.3               | 13.5, 17.3  | 1.6                | 1.2, 2.0   | 7.3               | 6.0, 8.8   |                      |
|              |                                 | CT                                       | 43.3       | 40.8, 45.8         | 47.6               | 45.3, 49.9  | 27.2               | 24.6, 29.9 | 35.7              | 32.3, 39.2 | <0.001               |
| TT           | 44.1                            | 41.1, 47.2                               | 37.1       | 34.5, 39.8         | 71.3               | 68.5, 73.8  | 57.0               | 53.2, 60.8 |                   |            |                      |
| <i>NQO1</i>  | rs10517                         | T                                        | 13.6       | 12.3, 14.9         | 13.2               | 12.1, 14.3  | 13.9               | 12.5, 15.4 | 6.5               | 5.1, 8.3   | <0.001               |
|              |                                 | CC                                       | 75.0       | 73.0, 77.0         | 75.5               | 73.5, 77.3  | 73.9               | 71.4, 76.3 | 87.2              | 83.8, 90.0 |                      |
|              |                                 | CT                                       | 22.9       | 21.4, 24.4         | 22.8               | 21.0, 24.7  | 24.3               | 22.2, 26.6 | 12.6              | 9.8, 16.0  | 0.001                |
|              |                                 | TT                                       | 2.1        | 1.5, 3.0           | 1.8                | 1.2, 2.6    | 1.7                | 1.1, 2.7   | 0.2               | 0.1, 0.5   |                      |
|              | rs1800566                       | T                                        | 21.5       | 19.8, 23.2         | 19.4               | 17.6, 21.3  | 18.8               | 17.7, 20.0 | 36.8              | 34.9, 38.8 | <0.001               |
|              |                                 | CC                                       | 61.8       | 58.8, 64.7         | 64.7               | 61.2, 68.0  | 65.8               | 64.1, 67.5 | 40.4              | 37.5, 43.4 |                      |
|              |                                 | CT                                       | 33.4       | 30.8, 36.2         | 31.8               | 28.7, 35.1  | 30.7               | 29.1, 32.3 | 45.6              | 42.8, 48.4 | <0.001               |
|              |                                 | TT                                       | 4.8        | 4.1, 5.6           | 3.5                | 2.8, 4.3    | 3.5                | 2.7, 4.6   | 14.0              | 12.4, 15.8 |                      |
|              | rs34755915                      | A                                        | 1.4        | 1.1, 1.8           | 1.8                | 1.5, 2.3    | 0.4                | 0.2, 0.8   | 0.5               | 0.3, 0.9   | <0.001               |
|              |                                 | AA                                       | 0.0        | 0.0, 0.3           | 0.0                | 0.0, 0.4    | 0.0                | NA         | 0.0               | NA         |                      |
|              |                                 | AG                                       | 2.8        | 2.2, 3.5           | 3.5                | 2.9, 4.4    | 0.8                | 0.4, 1.6   | 1.1               | 0.6, 1.8   | <0.001               |
|              |                                 | GG                                       | 97.2       | 96.5, 97.8         | 96.4               | 95.6, 97.1  | 99.2               | 98.4, 99.6 | 98.9              | 98.2, 99.4 |                      |
| rs689452     | G                               | 12.5                                     | 11.4, 13.7 | 11.9               | 11.0, 12.9         | 13.7        | 12.3, 15.3         | 6.3        | 4.9, 8.2          | <0.001     |                      |
|              | CC                              | 76.6                                     | 74.8, 78.4 | 77.5               | 75.7, 79.3         | 74.2        | 71.7, 76.6         | 87.5       | 83.9, 90.4        | <0.001     |                      |

| Gene symbol     | Variant (dbSNP ID) <sup>a</sup> | Minor Allele <sup>b</sup> /All Genotypes | Total <sup>c</sup> |            | Non-Hispanic white |            | Non-Hispanic black |            | Mexican- American |            | P value <sup>d</sup> |
|-----------------|---------------------------------|------------------------------------------|--------------------|------------|--------------------|------------|--------------------|------------|-------------------|------------|----------------------|
|                 |                                 |                                          | %                  | 95% CI     | %                  | 95% CI     | %                  | 95% CI     | %                 | 95% CI     |                      |
|                 | rs689453                        | CG                                       | 21.6               | 20.2, 23.2 | 21.1               | 19.4, 23.0 | 24.1               | 21.9, 26.4 | 12.3              | 9.4, 15.8  | <0.001               |
|                 |                                 | GG                                       | 1.7                | 1.2, 2.5   | 1.3                | 0.9, 2.0   | 1.7                | 1.1, 2.6   | 0.2               | 0.1, 0.5   |                      |
|                 |                                 | A                                        | 7.0                | 6.1, 8.1   | 7.9                | 6.7, 9.2   | 5.1                | 4.2, 6.2   | 5.2               | 3.8, 7.0   |                      |
|                 |                                 | AA                                       | 0.4                | 0.2, 0.9   | 0.5                | 0.2, 1.1   | 0.4                | 0.1, 1.1   | 0.6               | 0.3, 1.3   |                      |
|                 |                                 | AG                                       | 13.2               | 11.4, 15.1 | 14.7               | 12.7, 17.0 | 9.5                | 7.5, 11.9  | 9.2               | 7.1, 12.0  |                      |
|                 |                                 | GG                                       | 86.4               | 84.4, 88.2 | 84.8               | 82.4, 86.9 | 90.2               | 87.9, 92.1 | 90.2              | 87.0, 92.6 |                      |
| <i>OGGI</i>     | rs1052133                       | G                                        | 23.0               | 21.3, 24.7 | 21.5               | 19.5, 23.5 | 16.4               | 15.2, 17.8 | 33.0              | 30.8, 35.2 | <0.001               |
|                 |                                 | CC                                       | 59.6               | 56.8, 62.4 | 61.3               | 57.9, 64.6 | 69.6               | 67.3, 71.8 | 44.3              | 40.8, 47.8 | <0.001               |
|                 |                                 | CG                                       | 34.8               | 32.5, 37.1 | 34.4               | 31.5, 37.5 | 28.0               | 25.8, 30.3 | 45.5              | 42.6, 48.4 |                      |
|                 |                                 | GG                                       | 5.6                | 4.7, 6.6   | 4.3                | 3.3, 5.5   | 2.5                | 1.6, 3.7   | 10.2              | 9.0, 11.6  |                      |
| <i>PONI</i>     | rs662                           | G                                        | 38.5               | 36.4, 40.6 | 31.5               | 29.7, 33.2 | 67.1               | 65.4, 68.8 | 46.5              | 45.0, 48.1 |                      |
|                 |                                 | AA                                       | 40.0               | 37.3, 42.8 | 47.3               | 44.4, 50.3 | 11.3               | 9.9, 12.8  | 28.6              | 25.4, 32.1 | <0.001               |
|                 |                                 | AG                                       | 43.0               | 40.8, 45.2 | 42.4               | 39.4, 45.4 | 43.2               | 41.5, 44.9 | 49.6              | 45.4, 53.9 |                      |
|                 | GG                              | 17.0                                     | 15.2, 19.0         | 10.3       | 9.0, 11.7          | 45.5       | 43.3, 47.7         | 21.7       | 20.1, 23.4        |            |                      |
|                 | rs854560                        | A                                        | 31.5               | 29.4, 33.6 | 35.6               | 33.6, 37.7 | 17.9               | 16.5, 19.3 | 23.0              | 21.3, 24.8 | <0.001               |
|                 |                                 | AA                                       | 11.1               | 10.0, 12.2 | 13.5               | 12.2, 14.9 | 2.9                | 2.3, 3.7   | 5.0               | 4.0, 6.1   | <0.001               |
|                 |                                 | AT                                       | 40.8               | 38.2, 43.5 | 44.3               | 41.4, 47.2 | 30.0               | 27.7, 32.3 | 36.1              | 33.2, 39.2 |                      |
| TT              |                                 | 48.1                                     | 44.8, 51.5         | 42.2       | 39.0, 45.6         | 67.1       | 64.6, 69.5         | 58.9       | 55.8, 61.9        |            |                      |
| <i>PPARG</i>    | rs1801282                       | G                                        | 11.6               | 10.6, 12.7 | 13.2               | 12.2, 14.3 | 2.5                | 1.9, 3.4   | 12.4              | 11.4, 13.4 |                      |
|                 |                                 | CC                                       | 78.5               | 76.6, 80.3 | 75.8               | 73.9, 77.6 | 95.0               | 93.3, 96.3 | 76.7              | 75.0, 78.3 | <0.001               |
|                 |                                 | CG                                       | 19.7               | 18.0, 21.5 | 22.0               | 20.2, 23.9 | 4.9                | 3.7, 6.6   | 21.8              | 20.4, 23.4 |                      |
|                 |                                 | GG                                       | 1.8                | 1.3, 2.4   | 2.2                | 1.6, 3.0   | 0.0                | 0.0, 0.4   | 1.5               | 1.0, 2.2   |                      |
| <i>SERPINE1</i> | rs1799762 <sup>f</sup>          | 4G                                       | 47.9               | 46.0, 49.8 | 52.5               | 50.8, 54.3 | 26.7               | 25.0, 28.4 | 34.0              | 31.5, 36.6 |                      |
|                 |                                 | 4G/4G                                    | 24.0               | 22.4, 25.6 | 27.7               | 25.8, 29.6 | 6.6                | 5.3, 8.3   | 11.9              | 9.5, 14.9  | <0.001               |
|                 |                                 | 4G/5G                                    | 47.8               | 46.1, 49.6 | 49.7               | 47.8, 51.7 | 40.1               | 37.8, 42.5 | 44.2              | 41.9, 46.5 |                      |
|                 |                                 | 5G/5G                                    | 28.2               | 25.8, 30.7 | 22.6               | 20.6, 24.7 | 53.3               | 50.8, 55.7 | 43.9              | 41.0, 46.9 |                      |
| <i>TGFBI</i>    | rs1982073                       | C                                        | 40.4               | 38.9, 41.9 | 38.5               | 36.8, 40.2 | 44.0               | 42.3, 45.7 | 50.3              | 48.4, 52.1 |                      |
|                 |                                 | CC                                       | 17.8               | 16.4, 19.3 | 16.3               | 14.5, 18.3 | 19.9               | 18.2, 21.8 | 26.8              | 24.9, 28.7 | <0.001               |

| Gene symbol  | Variant (dbSNP ID) <sup>a</sup> | Minor Allele <sup>b</sup> /All Genotypes | Total <sup>c</sup> |            | Non-Hispanic white |            | Non-Hispanic black |            | Mexican- American |            | P value <sup>d</sup> |
|--------------|---------------------------------|------------------------------------------|--------------------|------------|--------------------|------------|--------------------|------------|-------------------|------------|----------------------|
|              |                                 |                                          | %                  | 95% CI     | %                  | 95% CI     | %                  | 95% CI     | %                 | 95% CI     |                      |
|              |                                 | CT                                       | 45.2               | 43.8, 46.6 | 44.4               | 42.4, 46.4 | 48.1               | 45.6, 50.6 | 47.0              | 45.0, 49.0 |                      |
|              |                                 | TT                                       | 37.0               | 35.2, 38.8 | 39.3               | 37.2, 41.5 | 32.0               | 29.7, 34.4 | 26.2              | 24.0, 28.6 |                      |
| <i>TLR4</i>  | rs4986790                       | G                                        | 6.4                | 5.8, 7.0   | 6.8                | 6.2, 7.5   | 7.5                | 6.8, 8.2   | 2.5               | 1.8, 3.3   | <0.001               |
|              |                                 | AA                                       | 87.7               | 86.5, 88.9 | 86.9               | 85.7, 88.1 | 85.7               | 84.3, 87.0 | 95.1              | 93.5, 96.4 |                      |
|              |                                 | AG                                       | 11.8               | 10.7, 13.1 | 12.5               | 11.3, 13.8 | 13.7               | 12.3, 15.2 | 4.8               | 3.6, 6.5   | <0.001               |
|              |                                 | GG                                       | 0.5                | 0.3, 0.8   | 0.5                | 0.3, 1.0   | 0.6                | 0.3, 1.2   | 0.0               | 0.0, 0.2   |                      |
| <i>TNF</i>   | rs1800629                       | A                                        | 15.3               | 14.0, 16.8 | 17.2               | 15.6, 19.0 | 13.1               | 11.9, 14.5 | 7.3               | 5.9, 9.1   | <0.001               |
|              |                                 | AA                                       | 2.4                | 1.8, 3.2   | 2.9                | 2.1, 4.0   | 1.8                | 1.3, 2.5   | 0.5               | 0.3, 0.8   |                      |
|              |                                 | AG                                       | 25.9               | 23.7, 28.2 | 28.7               | 26.1, 31.5 | 22.7               | 20.8, 24.6 | 13.6              | 10.8, 16.9 | <0.001               |
|              |                                 | GG                                       | 71.7               | 69.2, 74.1 | 68.4               | 65.4, 71.3 | 75.5               | 73.2, 77.7 | 85.9              | 82.5, 88.7 |                      |
|              | rs1800750                       | A                                        | 1.6                | 1.2, 2.1   | 1.3 <sup>e</sup>   | 0.9, 2.0   | 2.3                | 1.9, 2.9   | 2.5               | 2.1, 2.9   | 0.07                 |
|              |                                 | AA                                       | 0.1                | 0.0, 0.2   | 0.1 <sup>e</sup>   | 0.0, 0.2   | 0.1                | 0.0, 0.3   | 0.0               | NA         |                      |
|              |                                 | AG                                       | 3.0                | 2.3, 4.1   | 2.5                | 1.6, 3.9   | 4.5                | 3.6, 5.6   | 5.0               | 4.3, 5.7   | <0.001               |
|              |                                 | GG                                       | 96.9               | 95.8, 97.7 | 97.4               | 96.0, 98.3 | 95.4               | 94.3, 96.3 | 95.0              | 94.3, 95.7 |                      |
|              | rs361525                        | A                                        | 5.5                | 4.9, 6.2   | 5.8                | 5.0, 6.6   | 4.1                | 3.3, 5.2   | 5.8               | 5.2, 6.5   | 0.05                 |
|              |                                 | AA                                       | 0.5                | 0.4, 0.8   | 0.7                | 0.4, 1.1   | 0.1                | 0.0, 0.6   | 0.2               | 0.1, 0.5   |                      |
| AG           |                                 | 10.0                                     | 8.8, 11.2          | 10.1       | 8.9, 11.4          | 8.0        | 6.4, 9.8           | 11.2       | 9.9, 12.6         | 0.022      |                      |
| GG           |                                 | 89.5                                     | 88.2, 90.7         | 89.2       | 87.7, 90.5         | 91.9       | 89.9, 93.5         | 88.6       | 87.2, 89.8        |            |                      |
| <i>VDR</i>   | rs2239185                       | C                                        | 49.3               | 47.4, 51.1 | 47.8 <sup>e</sup>  | 45.2, 50.5 | 42.9               | 41.2, 44.6 | 58.2              | 55.1, 61.3 | <0.001               |
|              |                                 | CC                                       | 26.5               | 23.8, 29.3 | 25.5 <sup>e</sup>  | 22.0, 29.3 | 18.2               | 16.3, 20.3 | 34.1              | 31.0, 37.4 |                      |
|              |                                 | CT                                       | 45.6               | 42.8, 48.4 | 44.7               | 41.5, 48.0 | 49.4               | 46.3, 52.5 | 48.2              | 46.0, 50.4 | <0.001               |
|              |                                 | TT                                       | 27.9               | 26.2, 29.8 | 29.8               | 27.4, 32.4 | 32.4               | 29.8, 35.0 | 17.7              | 14.6, 21.3 |                      |
|              | rs731236                        | C                                        | 34.5               | 32.9, 36.0 | 38.1               | 36.0, 40.3 | 28.2               | 26.8, 29.6 | 23.8              | 21.6, 26.1 | <0.001               |
|              |                                 | CC                                       | 13.0               | 11.8, 14.2 | 15.6               | 14.1, 17.1 | 7.2                | 6.2, 8.4   | 4.9               | 3.7, 6.5   |                      |
|              |                                 | CT                                       | 43.0               | 40.9, 45.1 | 45.1               | 42.5, 47.7 | 41.9               | 39.7, 44.1 | 37.8              | 35.3, 40.3 | <0.001               |
|              |                                 | TT                                       | 44.1               | 41.7, 46.4 | 39.4               | 36.2, 42.7 | 50.8               | 48.6, 53.1 | 57.3              | 53.9, 60.6 |                      |
| <i>XRCC1</i> | rs1001581                       | A                                        | 38.9               | 37.5, 40.3 | 39.9               | 38.0, 41.9 | 36.7               | 34.9, 38.5 | 30.2              | 27.8, 32.7 | <0.001               |
|              |                                 | AA                                       | 14.9               | 13.6, 16.3 | 15.3               | 13.6, 17.3 | 14.6               | 13.1, 16.2 | 9.2               | 7.6, 10.9  | <0.001               |
|              |                                 | AG                                       | 47.9               | 45.6, 50.2 | 49.2               | 46.0, 52.4 | 44.2               | 41.7, 46.7 | 42.1              | 38.8, 45.4 |                      |

| Gene symbol | Variant (dbSNP ID) <sup>a</sup> | Minor Allele <sup>b</sup> /All Genotypes | Total <sup>c</sup> |            | Non-Hispanic white |            | Non-Hispanic black |            | Mexican- American |            | P value <sup>d</sup> |        |
|-------------|---------------------------------|------------------------------------------|--------------------|------------|--------------------|------------|--------------------|------------|-------------------|------------|----------------------|--------|
|             |                                 |                                          | %                  | 95% CI     | %                  | 95% CI     | %                  | 95% CI     | %                 | 95% CI     |                      |        |
| rs1799782   |                                 | GG                                       | 37.2               | 35.0, 39.4 | 35.5               | 32.5, 38.5 | 41.2               | 38.6, 43.9 | 48.8              | 44.9, 52.6 | <0.001               |        |
|             |                                 | T                                        | 7.0                | 6.4, 7.7   | 5.0                | 4.3, 5.6   | 6.2                | 5.3, 7.1   | 14.8              | 13.3, 16.4 |                      |        |
|             |                                 | CC                                       | 86.7               | 85.6, 87.7 | 90.4               | 89.1, 91.6 | 88.2               | 86.6, 89.6 | 73.0              | 70.7, 75.1 |                      |        |
|             |                                 | CT                                       | 12.6               | 11.6, 13.7 | 9.3                | 8.1, 10.6  | 11.3               | 10.0, 12.6 | 24.4              | 23.0, 25.9 |                      | <0.001 |
|             |                                 | TT                                       | 0.7                | 0.5, 1.1   | 0.3                | 0.1, 0.8   | 0.5                | 0.2, 1.3   | 2.6               | 1.8, 3.8   |                      |        |
| rs25486     |                                 | G                                        | 33.6               | 32.4, 34.9 | 36.0               | 34.2, 37.8 | 24.1               | 22.1, 26.3 | 25.8              | 24.0, 27.6 | <0.001               |        |
|             |                                 | AA                                       | 44.0               | 41.8, 46.2 | 40.6               | 37.4, 43.8 | 57.9               | 54.9, 60.8 | 55.3              | 52.3, 58.3 |                      |        |
|             |                                 | AG                                       | 44.7               | 42.1, 47.2 | 46.9               | 43.3, 50.5 | 35.9               | 33.7, 38.3 | 37.8              | 35.4, 40.3 | <0.001               |        |
| rs25487     |                                 | GG                                       | 11.3               | 10.1, 12.6 | 12.5               | 11.0, 14.3 | 6.2                | 4.7, 8.0   | 6.9               | 6.0, 7.9   | <0.001               |        |
|             |                                 | A                                        | 32.6               | 31.2, 34.1 | 36.1               | 34.3, 37.9 | 15.9               | 14.4, 17.5 | 25.6              | 23.9, 27.5 |                      |        |
|             |                                 | AA                                       | 11.0               | 9.8, 12.4  | 12.7               | 11.1, 14.4 | 2.8                | 2.0, 4.1   | 6.8               | 5.8, 7.8   |                      |        |
|             |                                 | AG                                       | 43.3               | 40.6, 46.0 | 46.9               | 43.3, 50.5 | 26.1               | 24.2, 28.2 | 37.7              | 35.3, 40.2 |                      | <0.001 |
| rs25489     |                                 | GG                                       | 45.7               | 43.2, 48.2 | 40.5               | 37.3, 43.7 | 71.0               | 68.6, 73.4 | 55.5              | 52.6, 58.4 | <0.001               |        |
|             |                                 | A                                        | 4.7                | 4.0, 5.4   | 4.0                | 3.3, 4.8   | 3.5                | 2.9, 4.2   | 12.4              | 10.8, 14.2 |                      |        |
|             |                                 | AA                                       | 0.2                | 0.2, 0.4   | 0.1                | 0.0, 0.3   | 0.2                | 0.1, 0.4   | 1.6               | 1.3, 2.1   |                      |        |
|             |                                 | AG                                       | 8.8                | 7.6, 10.2  | 7.8                | 6.4, 9.4   | 6.5                | 5.2, 8.0   | 21.6              | 18.8, 24.6 |                      | <0.001 |
|             |                                 | GG                                       | 90.9               | 89.6, 92.1 | 92.2               | 90.5, 93.5 | 93.3               | 91.8, 94.5 | 76.8              | 73.5, 79.8 |                      |        |

CI, confidence interval; NA, not applicable.

<sup>a</sup> Unique identifier in the Entrez SNP (single-nucleotide polymorphism) database at the National Center for Biotechnology Information (<http://www.ncbi.nlm.nih.gov/projects/SNP/>).

<sup>b</sup> Minor allele determined by frequency in the total US population.

<sup>c</sup> Includes the "other" race/ethnicity category.

<sup>d</sup> "other" race/ethnicity category was not included in chi-square tests.

<sup>e</sup> Variant deviates from Hardy-Weinberg proportions in race/ethnic group at  $P < 0.01$  in an unweighted chi-square goodness-of-fit test.

<sup>f</sup> Variant also known as rs1799768 and rs1799889.
