# Supplementary material for: Prevalence in the United States of Selected Candidate Gene Variants: Third National Health and Nutrition Examination Survey, 1991–1994
Source: PubMed Central journal article supplement — Am J Epidemiol. 2008 Oct 20;169(1):54–66. doi: 10.1093/aje/kwn286 (PMC2638878; doi:10.1093/aje/kwn286), 2008-10-20
Supplement: kwn286_3.pdf [file kwn286_3.pdf]

| Gene<br>ppendix<br>symbol | Variant<br>(dbSNP ID) <sup>a</sup> | Allele <sup>b</sup> | Non-Hispanic white |            |       |            |       |            |      |            | Non-Hispanic black |            |       |            |       |            |      |            | Mexican-American |            |       |            |       |            |      |            |  |
|---------------------------|------------------------------------|---------------------|--------------------|------------|-------|------------|-------|------------|------|------------|--------------------|------------|-------|------------|-------|------------|------|------------|------------------|------------|-------|------------|-------|------------|------|------------|--|
|                           |                                    |                     | Age (years)        |            |       |            |       |            |      |            | Age (years)        |            |       |            |       |            |      |            | Age (years)      |            |       |            |       |            |      |            |  |
|                           |                                    |                     | 12-19              |            | 20-39 |            | 40-59 |            | ≥ 60 |            | 12-19              |            | 20-39 |            | 40-59 |            | ≥ 60 |            | 12-19            |            | 20-39 |            | 40-59 |            | ≥ 60 |            |  |
|                           |                                    |                     | %                  | 95% CI     | %     | 95% CI     | %     | 95% CI     | %    | 95% CI     | %                  | 95% CI     | %     | 95% CI     | %     | 95% CI     | %    | 95% CI     | %                | 95% CI     | %     | 95% CI     | %     | 95% CI     | %    | 95% CI     |  |
| <i>I</i>                  |                                    |                     |                    |            |       |            |       |            |      |            |                    |            |       |            |       |            |      |            |                  |            |       |            |       |            |      |            |  |
| <i>TGFB1</i>              | rs1982073                          | C (T)               | 37.0               | 31.8, 42.4 | 37.9  | 34.5, 41.4 | 38.6  | 35.5, 41.7 | 40.2 | 38.0, 42.4 | 38.2               | 35.0, 41.5 | 44.8  | 42.3, 47.3 | 46.0  | 43.0, 49.0 | 45.4 | 41.0, 49.9 | 51.6             | 48.1, 54.9 | 51.1  | 48.6, 53.6 | 46.7  | 44.0, 49.3 | 51.5 | 46.7, 56.2 |  |
| <i>TLR4</i>               | rs4986790                          | G (A)               | 7.4                | 5.1, 10.7  | 6.9   | 5.7, 8.2   | 6.5   | 5.2, 8.2   | 6.7  | 5.0, 8.8   | 7.9                | 6.1, 10.1  | 8.2   | 6.9, 9.8   | 6.2   | 4.6, 8.2   | 6.9  | 4.9, 9.6   | 1.8              | 0.9, 3.7   | 2.7   | 2.0, 3.8   | 2.3   | 1.0, 5.2   | 2.8  | 1.5, 5.1   |  |
| <i>TNF</i>                | rs1800629                          | A (G)               | 16.8               | 13.1, 21.3 | 18.3  | 15.3, 21.7 | 16.4  | 14.2, 18.7 | 17.0 | 15.0, 19.1 | 14.1               | 11.5, 17.2 | 14.1  | 12.2, 16.3 | 11.9  | 10.2, 13.8 | 11.0 | 8.4, 14.3  | 8.5              | 5.2, 13.6  | 6.8   | 5.4, 8.7   | 6.8   | 4.9, 9.4   | 8.6  | 5.9, 12.2  |  |
|                           | rs1800750                          | A (G)               | 1.0                | 0.3, 2.8   | 1.5   | 0.9, 2.6   | 1.2   | 0.6, 2.6   | 1.4  | 0.8, 2.6   | 2.0                | 1.2, 3.5   | 3.0   | 2.3, 4.1   | 1.5   | 0.8, 2.6   | 2.1  | 1.0, 4.5   | 1.9              | 1.3, 2.9   | 2.2   | 1.6, 3.2   | 3.1   | 1.9, 4.9   | 3.9  | 2.5, 6.0   |  |
|                           | rs361525*                          | A (G)               | 5.4                | 3.9, 7.6   | 7.1   | 5.6, 8.9   | 4.6   | 3.4, 6.1   | 5.3  | 4.3, 6.5   | 5.1                | 3.5, 7.4   | 4.7   | 3.6, 6.1   | 3.1   | 1.9, 5.0   | 3.0  | 1.7, 5.2   | 5.5              | 4.2, 7.0   | 6.2   | 5.2, 7.4   | 5.1   | 3.2, 8.1   | 6.3  | 4.6, 8.6   |  |
| <i>VDR</i>                | rs2239185                          | C (T)               | 45.6               | 37.0, 54.4 | 50.0  | 47.2, 52.8 | 47.3  | 43.6, 51.0 | 46.3 | 42.9, 49.6 | 41.2               | 37.4, 45.0 | 43.4  | 40.7, 46.1 | 41.0  | 38.0, 44.2 | 47.2 | 43.2, 51.3 | 56.9             | 50.8, 62.8 | 57.9  | 55.6, 60.1 | 60.6  | 54.8, 66.2 | 57.3 | 50.7, 63.7 |  |
|                           | rs731236                           | C (T)               | 38.2               | 30.5, 46.6 | 36.6  | 34.3, 38.9 | 39.3  | 36.5, 42.1 | 39.0 | 36.0, 42.2 | 25.8               | 22.9, 29.0 | 28.6  | 26.4, 30.8 | 29.7  | 26.6, 33.0 | 27.4 | 24.1, 31.0 | 23.5             | 20.4, 27.0 | 24.1  | 21.4, 27.1 | 23.1  | 19.8, 26.8 | 24.3 | 20.1, 29.1 |  |
| <i>XRCC1</i>              | rs1001581                          | A (G)               | 34.9               | 27.2, 43.4 | 41.9  | 39.0, 44.9 | 40.3  | 36.9, 43.7 | 38.9 | 37.3, 40.6 | 36.6               | 33.4, 39.9 | 35.3  | 32.1, 38.7 | 36.0  | 32.8, 39.3 | 42.2 | 37.1, 47.4 | 31.4             | 26.5, 36.7 | 29.3  | 26.6, 32.3 | 30.6  | 26.8, 34.7 | 31.3 | 27.5, 35.5 |  |
|                           | rs1799782                          | T (C)               | 5.8                | 3.7, 9.0   | 4.1   | 3.4, 4.8   | 4.9   | 3.2, 7.5   | 6.1  | 4.9, 7.5   | 5.8                | 4.5, 7.4   | 6.3   | 5.2, 7.7   | 7.4   | 5.7, 9.4   | 4.2  | 2.9, 5.9   | 13.2             | 10.0, 17.2 | 15.1  | 12.9, 17.6 | 14.6  | 12.9, 16.5 | 17.6 | 13.0, 23.4 |  |
|                           | rs25486                            | G (A)               | 32.3               | 25.1, 40.5 | 37.5  | 34.6, 40.5 | 36.1  | 32.9, 39.4 | 35.3 | 33.6, 37.1 | 23.9               | 21.4, 26.7 | 22.5  | 20.0, 25.2 | 26.6  | 23.8, 29.6 | 25.2 | 22.0, 28.7 | 25.7             | 21.7, 30.2 | 25.3  | 23.1, 27.6 | 26.5  | 23.2, 30.0 | 26.8 | 22.8, 31.3 |  |
|                           | rs25487                            | A (G)               | 32.1               | 24.7, 40.4 | 37.2  | 34.3, 40.2 | 36.7  | 33.8, 39.8 | 35.6 | 33.9, 37.3 | 16.6               | 14.0, 19.6 | 14.5  | 12.5, 16.7 | 17.1  | 14.9, 19.5 | 17.2 | 13.8, 21.2 | 25.9             | 21.9, 30.4 | 25.2  | 23.2, 27.3 | 25.8  | 22.5, 29.4 | 27.1 | 23.3, 31.2 |  |
|                           | rs25489                            | A (G)               | 3.9                | 2.5, 6.0   | 4.1   | 3.1, 5.5   | 3.8   | 2.6, 5.7   | 3.9  | 3.1, 5.0   | 3.8                | 2.5, 5.8   | 3.4   | 2.7, 4.3   | 2.7   | 1.9, 3.9   | 4.6  | 2.9, 7.3   | 12.9             | 9.6, 17.1  | 13.2  | 11.4, 15.3 | 10.4  | 8.5, 12.7  | 11.6 | 9.5, 14.2  |  |

CI, confidence interval; NA, not applicable.

\*  $P < 0.05$  after adjustment for race/ethnicity.

<sup>a</sup> Unique identifier in the Entrez SNP (single-nucleotide polymorphism) database at the National Center for Biotechnology Information (<http://www.ncbi.nlm.nih.gov/projects/SNP/>).

<sup>b</sup> Major allele is in parentheses.

<sup>c</sup> Variant also known as rs1799768 and rs1799889.
