# Supplementary material for: Prevalence in the United States of Selected Candidate Gene Variants: Third National Health and Nutrition Examination Survey, 1991–1994
Source: PubMed Central journal article supplement — Am J Epidemiol. 2008 Oct 20;169(1):54–66. doi: 10.1093/aje/kwn286 (PMC2638878; doi:10.1093/aje/kwn286), 2008-10-20
Supplement: kwn286_4.pdf [file kwn286_4.pdf]

Appendix 6. Weighted Genotype Prevalence in the US population, by Race/Ethnicity and by Age, Third National Health and Nutrition Examination Survey (NHANES III), Phase 2 (1991–1994)

| Gene symbol | Variant (dbSNP ID)* | Genotype  | Non-Hispanic white |            |            |            |            |            |            |            |            |            | Non-Hispanic black |            |            |            |            |            |            |            |            |            | Mexican-American |            |            |            |            |  |  |  |  |  |
|-------------|---------------------|-----------|--------------------|------------|------------|------------|------------|------------|------------|------------|------------|------------|--------------------|------------|------------|------------|------------|------------|------------|------------|------------|------------|------------------|------------|------------|------------|------------|--|--|--|--|--|
|             |                     |           | Age (years)        |            |            |            |            |            |            |            |            |            | Age (years)        |            |            |            |            |            |            |            |            |            | Age (years)      |            |            |            |            |  |  |  |  |  |
|             |                     |           | 12-19              |            | 20-39      |            | 40-59      |            | ≥ 60       |            | 12-19      |            | 20-39              |            | 40-59      |            | ≥ 60       |            | 12-19      |            | 20-39      |            | 40-59            |            | ≥ 60       |            |            |  |  |  |  |  |
|             |                     |           | %                  | 95% CI     | %          | 95% CI     | %          | 95% CI     | %          | 95% CI     | %          | 95% CI     | %                  | 95% CI     | %          | 95% CI     | %          | 95% CI     | %          | 95% CI     | %          | 95% CI     | %                | 95% CI     | %          | 95% CI     |            |  |  |  |  |  |
| ABCB1       | rs1045642           | CC        | 25.8               | 19.5, 33.4 | 26.5       | 21.8, 31.7 | 21.2       | 17.8, 25.1 | 24.2       | 21.1, 27.6 | 61.1       | 56.4, 65.6 | 62.6               | 57.2, 67.6 | 65.4       | 61.0, 69.5 | 64.6       | 56.3, 72.1 | 30.4       | 23.6, 38.2 | 28.9       | 25.8, 32.2 | 35.8             | 29.8, 42.2 | 29.1       | 23.0, 36.0 |            |  |  |  |  |  |
|             |                     | CT        | 47.8               | 42.6, 53.1 | 46.2       | 41.7, 50.8 | 52.0       | 48.0, 55.9 | 45.8       | 42.5, 49.3 | 34.7       | 30.0, 39.7 | 31.9               | 27.1, 37.0 | 28.9       | 24.5, 33.6 | 31.3       | 24.5, 39.2 | 46.1       | 41.1, 51.1 | 51.7       | 48.2, 55.2 | 44.9             | 39.7, 50.2 | 52.5       | 46.1, 58.9 |            |  |  |  |  |  |
|             |                     | TT        | 26.3               | 20.4, 33.2 | 27.3       | 22.5, 32.8 | 26.8       | 23.6, 30.2 | 30.0       | 26.6, 33.5 | 4.2        | 2.4, 7.3   | 5.6                | 4.2, 7.4   | 5.8        | 3.9, 8.5   | 4.1        | 2.6, 6.4   | 23.5       | 15.8, 33.5 | 19.4       | 17.7, 21.2 | 19.4             | 15.7, 23.7 | 18.4       | 12.6, 26.0 |            |  |  |  |  |  |
| ACE         | rs4646994           | DD        | 33.4               | 26.9, 40.5 | 26.4       | 21.7, 31.8 | 29.3       | 24.2, 34.9 | 29.5       | 25.6, 33.8 | 36.5       | 30.5, 43.0 | 32.8               | 29.4, 36.3 | 33.8       | 29.1, 38.9 | 33.5       | 29.1, 38.1 | 20.2       | 15.6, 25.7 | 21.9       | 18.0, 26.4 | 19.7             | 15.2, 25.1 | 16.9       | 15.0, 19.0 |            |  |  |  |  |  |
|             |                     | DI        | 48.0               | 37.0, 59.1 | 52.8       | 46.1, 59.5 | 52.0       | 45.6, 58.4 | 50.8       | 46.4, 55.3 | 49.7       | 42.4, 57.0 | 51.1               | 48.2, 54.1 | 48.5       | 44.1, 53.0 | 47.8       | 40.5, 55.1 | 53.1       | 48.6, 57.6 | 50.6       | 46.7, 54.6 | 53.3             | 47.2, 59.3 | 53.6       | 46.9, 60.1 |            |  |  |  |  |  |
|             |                     | II        | 18.7               | 12.5, 27.0 | 20.7       | 17.0, 25.0 | 18.7       | 14.6, 23.6 | 19.6       | 16.6, 23.0 | 13.8       | 10.3, 18.3 | 16.1               | 13.2, 19.4 | 17.6       | 14.6, 21.0 | 18.8       | 14.1, 24.5 | 26.8       | 21.6, 32.7 | 27.5       | 23.8, 31.5 | 27.0             | 21.3, 33.6 | 29.5       | 23.3, 36.5 |            |  |  |  |  |  |
| ADH1B       | rs1229984           | AA        | 0.4                | 0.1, 3.1   | 0.2        | 0.0, 1.5   | 0.0        | NA         | 0.2        | 0.1, 0.7   | 0.0        | NA         | 0.0                | NA         | 0.0        | NA         | 0.0        | NA         | 0.1        | 0.0, 0.7   | 0.1        | 0.0, 0.7   | 0.0              | NA         | 0.2        | 0.0, 1.4   |            |  |  |  |  |  |
|             |                     | AG        | 11.4               | 7.9, 16.2  | 8.2        | 6.3, 10.5  | 8.5        | 5.8, 12.2  | 9.8        | 7.7, 12.4  | 2.4        | 1.4, 4.2   | 2.9                | 1.3, 6.1   | 3.5        | 1.6, 7.8   | 1.1        | 0.3, 4.0   | 11.9       | 9.2, 15.2  | 10.1       | 7.9, 12.9  | 10.7             | 7.8, 14.5  | 12.0       | 7.9, 17.9  |            |  |  |  |  |  |
|             |                     | GG        | 88.2               | 82.8, 92.1 | 91.7       | 89.3, 93.5 | 91.5       | 87.8, 94.2 | 90.0       | 87.5, 92.0 | 97.6       | 95.8, 98.6 | 97.1               | 93.9, 98.7 | 96.5       | 92.2, 98.4 | 98.9       | 96.0, 99.7 | 88.0       | 84.7, 90.7 | 89.8       | 87.1, 91.9 | 89.3             | 85.5, 92.2 | 87.8       | 82.0, 91.9 |            |  |  |  |  |  |
|             | rs17033             | AA        | 86.9               | 81.6, 90.8 | 83.7       | 80.8, 86.2 | 81.6       | 78.4, 84.4 | 85.4       | 82.0, 88.2 | 89.6       | 86.2, 92.3 | 85.7               | 82.0, 88.7 | 87.4       | 82.9, 90.8 | 86.0       | 79.5, 90.6 | 50.7       | 44.8, 56.7 | 50.1       | 45.6, 56.6 | 46.2             | 43.2, 49.2 | 48.9       | 41.7, 56.1 |            |  |  |  |  |  |
|             |                     | AG        | 12.9               | 9.1, 17.8  | 15.7       | 12.9, 18.9 | 17.3       | 14.6, 20.4 | 13.9       | 11.4, 16.9 | 9.1        | 6.9, 12.0  | 13.9               | 10.9, 17.5 | 12.6       | 9.2, 17.1  | 12.5       | 8.2, 18.6  | 38.1       | 31.5, 45.2 | 41.6       | 37.1, 46.3 | 43.9             | 40.1, 47.7 | 41.0       | 35.7, 46.5 |            |  |  |  |  |  |
|             |                     | GG        | 0.2                | 0.0, 1.9   | 0.7        | 0.2, 2.5   | 1.1        | 0.5, 2.5   | 0.7        | 0.3, 1.8   | 1.2        | 0.4, 3.7   | 0.4                | 0.2, 1.3   | 0.0        | NA         | 1.5        | 0.4, 6.4   | 11.1       | 8.1, 15.1  | 8.3        | 6.0, 11.2  | 9.9              | 7.2, 13.6  | 10.1       | 6.5, 15.4  |            |  |  |  |  |  |
|             | rs2066702           | CC        | 100.0              | NA         | 98.9       | 97.1, 99.6 | 99.3       | 98.0, 99.8 | 99.2       | 98.4, 99.6 | 62.0       | 58.0, 65.8 | 63.0               | 59.2, 66.5 | 66.7       | 62.8, 70.4 | 64.8       | 55.8, 72.9 | 97.6       | 93.1, 99.2 | 98.6       | 97.6, 99.2 | 98.3             | 96.1, 99.3 | 98.1       | 96.4, 99.0 |            |  |  |  |  |  |
|             |                     | CT        | 0.0                | NA         | 1.1        | 0.4, 2.9   | 0.7        | 0.2, 2.0   | 0.8        | 0.4, 1.6   | 34.7       | 31.0, 38.6 | 33.3               | 30.0, 36.8 | 28.8       | 24.1, 34.0 | 30.8       | 23.1, 39.7 | 2.4        | 0.8, 6.9   | 1.4        | 0.8, 2.4   | 1.7              | 0.7, 3.9   | 1.9        | 1.0, 3.6   |            |  |  |  |  |  |
|             |                     | TT        | 0.0                | NA         | 0.0        | NA         | 0.0        | NA         | 0.0        | NA         | 3.4        | 1.6, 7.1   | 3.7                | 2.4, 5.7   | 4.5        | 2.7, 7.2   | 4.4        | 2.0, 9.2   | 0.0        | NA         | 0.0        | NA         | 0.0              | NA         | 0.0        | NA         |            |  |  |  |  |  |
|             | ADH1C               | rs1693482 | AA                 | 19.0       | 12.5, 27.8 | 14.6       | 12.3, 17.3 | 16.2       | 12.9, 20.2 | 14.2       | 11.7, 17.2 | 2.1        | 0.9, 5.1           | 2.0        | 1.2, 3.1   | 2.3        | 1.1, 4.9   | 3.3        | 1.6, 6.7   | 11.7       | 8.7, 15.7  | 11.2       | 9.0, 13.7        | 10.8       | 7.8, 14.6  | 10.4       | 6.9, 15.4  |  |  |  |  |  |
|             |                     |           | AG                 | 45.8       | 39.2, 52.5 | 47.3       | 42.9, 51.8 | 43.5       | 39.1, 47.9 | 46.7       | 42.8, 50.6 | 22.6       | 18.2, 27.7         | 24.7       | 21.3, 28.4 | 25.3       | 21.0, 30.2 | 25.3       | 19.8, 31.7 | 44.1       | 38.8, 49.5 | 46.2       | 41.8, 50.7       | 47.4       | 42.8, 52.0 | 45.3       | 39.5, 51.2 |  |  |  |  |  |
|             |                     |           | GG                 | 35.2       | 28.1, 43.1 | 38.1       | 32.4, 44.0 | 40.3       | 33.9, 47.0 | 39.1       | 35.8, 42.5 | 75.2       | 69.8, 79.9         | 73.4       | 69.5, 76.8 | 72.4       | 67.3, 76.9 | 71.4       | 64.5, 77.4 | 44.2       | 38.7, 49.9 | 42.6       | 38.8, 46.5       | 41.8       | 37.2, 46.6 | 44.3       | 37.4, 51.4 |  |  |  |  |  |
| rs698       |                     | AA        | 33.9               | 26.3, 42.4 | 36.7       | 31.8, 41.9 | 38.8       | 32.1, 45.9 | 38.5       | 35.3, 41.8 | 74.5       | 69.1, 79.2 | 73.2               | 69.3, 76.8 | 71.5       | 66.2, 76.2 | 70.3       | 63.4, 76.3 | 52.9       | 47.2, 58.6 | 48.4       | 45.0, 51.9 | 47.7             | 43.8, 51.5 | 48.6       | 41.4, 55.9 |            |  |  |  |  |  |
|             |                     | AG        | 46.9               | 39.1, 54.7 | 47.8       | 43.8, 51.8 | 44.4       | 39.7, 49.2 | 46.4       | 42.8, 50.0 | 22.9       | 18.6, 27.8 | 24.8               | 21.3, 28.7 | 26.0       | 21.3, 31.3 | 26.5       | 20.9, 32.9 | 35.3       | 30.5, 40.5 | 39.7       | 35.7, 43.9 | 41.5             | 38.8, 44.3 | 41.4       | 34.9, 48.3 |            |  |  |  |  |  |
|             |                     | GG        | 19.3               | 12.6, 28.3 | 15.5       | 12.9, 18.6 | 16.8       | 13.6, 20.5 | 15.1       | 12.6, 17.9 | 2.6        | 1.2, 5.6   | 1.9                | 1.2, 3.1   | 2.5        | 1.1, 5.7   | 3.3        | 1.6, 6.6   | 11.7       | 8.5, 16.0  | 11.9       | 9.9, 14.2  | 10.8             | 8.0, 14.6  | 10.0       | 6.9, 14.2  |            |  |  |  |  |  |
| ADRB1       | rs1801252           | AA        | 76.0               | 66.5, 83.5 | 75.4       | 71.5, 78.8 | 76.8       | 71.7, 81.3 | 74.9       | 71.7, 77.9 | 60.5       | 55.3, 65.5 | 60.0               | 56.8, 63.2 | 58.3       | 53.6, 62.8 | 64.6       | 58.2, 70.6 | 50.5       | 42.7, 58.3 | 51.3       | 47.0, 55.7 | 53.3             | 49.8, 56.7 | 54.2       | 44.3, 63.8 |            |  |  |  |  |  |
|             |                     | AG        | 21.8               | 15.4, 29.9 | 22.1       | 18.9, 25.8 | 21.8       | 17.5, 26.7 | 22.2       | 19.1, 25.8 | 34.8       | 30.0, 40.0 | 33.8               | 29.7, 38.1 | 36.4       | 31.9, 41.0 | 32.4       | 26.4, 39.0 | 40.0       | 33.2, 47.2 | 41.0       | 37.3, 44.9 | 39.6             | 35.9, 43.4 | 38.4       | 29.8, 47.8 |            |  |  |  |  |  |
|             |                     | GG        | 2.2                | 0.7, 6.4   | 2.5        | 1.1, 5.7   | 1.4        | 0.7, 2.9   | 2.8        | 2.2, 3.6   | 4.7        | 2.9, 7.5   | 6.2                | 4.3, 8.8   | 5.3        | 3.6, 7.8   | 3.0        | 1.8, 4.9   | 9.4        | 7.0, 12.7  | 7.6        | 6.3, 9.1   | 7.2              | 5.2, 9.8   | 7.4        | 4.7, 11.6  |            |  |  |  |  |  |
| ADRB2       | rs1042713           | AA        | 18.1               | 13.8, 23.3 | 15.6       | 11.9, 20.1 | 15.9       | 12.6, 20.0 | 14.1       | 12.2, 16.2 | 24.6       | 19.4, 30.6 | 25.0               | 22.6, 27.5 | 25.5       | 20.2, 31.6 | 24.8       | 20.5, 29.8 | 17.3       | 12.7, 23.2 | 13.9       | 12.4, 15.5 | 18.3             | 15.2, 21.8 | 14.9       | 11.0, 20.0 |            |  |  |  |  |  |
|             |                     | AG        | 44.6               | 37.5, 52.0 | 47.1       | 42.0, 52.3 | 45.4       | 41.3, 49.5 | 47.8       | 45.3, 50.2 | 46.5       | 41.3, 51.8 | 49.0               | 45.7, 52.4 | 52.2       | 47.4, 56.9 | 49.0       | 43.8, 54.2 | 54.1       | 48.9, 59.2 | 54.5       | 50.7, 58.2 | 46.2             | 40.1, 52.5 | 50.4       | 43.8, 57.0 |            |  |  |  |  |  |
|             |                     | GG        | 37.3               | 30.6, 44.5 | 37.3       | 32.2, 42.7 | 38.7       | 34.4, 43.3 | 38.2       | 34.8, 41.7 | 29.0       | 22.3, 36.6 | 26.0               | 22.7, 29.6 | 22.3       | 18.0, 27.4 | 26.2       | 20.6, 32.7 | 28.6       | 24.9, 32.6 | 31.6       | 27.9, 35.6 | 35.5             | 31.1, 40.2 | 34.6       | 28.5, 41.4 |            |  |  |  |  |  |
|             | rs1042714           | CC        | 35.9               | 30.2, 41.9 | 36.8       | 32.9, 40.9 | 31.4       | 26.4, 36.9 | 33.8       | 31.0, 36.8 | 64.5       | 59.6, 69.1 | 69.4               | 64.5, 74.0 | 66.7       | 61.4, 71.6 | 67.6       | 60.8, 73.7 | 63.2       | 54.1, 71.5 | 60.1       | 56.7, 63.4 | 63.3             | 55.3, 70.7 | 59.7       | 49.8, 68.9 |            |  |  |  |  |  |
|             |                     | CG        | 43.6               | 37.7, 49.7 | 45.3       | 41.7, 49.0 | 49.4       | 44.4, 54.3 | 49.7       | 46.2, 53.3 | 31.1       | 26.1, 36.6 | 26.5               | 22.2, 31.4 | 29.8       | 25.1, 34.9 | 30.6       | 24.2, 37.9 | 33.0       | 26.3, 40.6 | 36.2       | 33.3, 39.2 | 32.6             | 26.3, 39.6 | 34.2       | 26.9, 42.2 |            |  |  |  |  |  |
|             |                     | GG        | 20.6               | 15.5, 26.7 | 17.9       | 15.5, 20.5 | 19.2       | 14.7, 24.8 | 16.5       | 14.1, 19.0 | 4.4        | 2.5, 7.6   | 4.0                | 2.7, 6.0   | 3.5        | 2.3, 5.4   | 1.8        | 0.7, 4.2   | 3.7        | 1.6, 8.4   | 3.7        | 2.4, 5.6   | 4.1              | 2.6, 6.4   | 6.1        | 3.6, 10.1  |            |  |  |  |  |  |
| ADRB3       | rs4994              | CC        | 0.4                | 0.0, 3.2   | 0.6        | 0.2, 1.5   | 0.9        | 0.3, 2.4   | 0.5        | 0.2, 1.2   | 0.8        | 0.4, 1.3   | 1.6                | 0.8, 3.2   | 2.4        | 1.0, 5.6   | 0.2        | 0.0, 1.4   | 4.1        | 2.4, 7.0   | 2.4        | 1.5, 3.7   | 2.4              | 1.3, 4.3   | 2.4        | 1.5, 3.9   |            |  |  |  |  |  |
|             |                     | CT        | 11.2               | 6.5, 18.7  | 12.9       | 9.8, 16.8  | 13.2       | 9.6, 17.9  | 11.5       | 10.1, 13.2 | 20.8       | 16.4, 26.1 | 20.0               | 16.9, 23.6 | 20.4       | 16.1, 25.4 | 21.7       | 18.1, 25.7 | 31.4       | 25.7, 37.8 | 26.4       | 21.9, 31.5 | 28.2             | 25.1, 31.6 | 25.3       | 20.5, 30.8 |            |  |  |  |  |  |
|             |                     | TT        | 88.4               | 80.6, 93.3 | 86.6       | 82.6, 89.8 | 85.9       | 81.0, 89.7 | 87.9       | 86.3, 89.4 | 78.4       | 73.0, 83.0 | 78.4               | 74.3, 82.0 | 77.3       | 72.6, 81.3 | 78.2       | 74.3, 81.6 | 64.5       | 58.8, 69.7 | 71.2       | 65.9, 76.0 | 69.4             | 66.6, 72.0 | 72.3       | 66.6, 77.3 |            |  |  |  |  |  |
| ALAD        | rs1800435           | CC        | 0.8                | 0.2, 3.5   | 0.5        | 0.1, 2.5   | 0.5        | 0.2, 1.4   | 0.6        | 0.2, 1.9   | 0.0        | NA         | 0.0                | NA         | 0.0        | NA         | 0.0        | NA         | 0.4        | 0.1, 3.5   | 0.3        | 0.1, 1.1   | 0.2              | 0.0, 1.5   | 0.0        | NA         |            |  |  |  |  |  |
|             |                     | CG        | 16.2               | 10.9, 23.4 | 12.6       | 10.3, 15.4 | 17.0       | 13.3, 21.6 | 15.9       | 12.9, 19.5 | 2.3        | 1.3, 4.1   | 3.1                | 2.0, 4.9   | 2.1        | 1.2, 3.8   | 2.7        | 1.3, 5.6   | 8.2        | 5.1, 12.9  | 9.1        | 6.8, 12.1  | 8.4              | 5.6, 12.3  | 5.3        | 3.2, 8.6   |            |  |  |  |  |  |
|             |                     | GG        | 82.9               | 75.5, 88.5 | 86.9       | 84.0, 89.3 | 82.5       | 77.7, 86.4 | 83.5       | 79.8, 86.6 | 97.7       | 95.9, 98.7 | 96.9               | 95.1, 98.0 | 97.9       | 96.2, 98.8 | 97.3       | 94.4, 98.7 | 91.4       | 87.1, 94.3 | 90.6       | 87.7, 92.9 | 91.4             | 87.5, 94.2 | 94.7       | 91.4, 96.8 |            |  |  |  |  |  |
| B9D2        | rs1800468           | AA        | 0.4                | 0.0, 3.5   | 0.5        | 0.1, 1.7   | 0.5        | 0.1, 2.6   | 0.5        | 0.2, 1.2   | 0.0        | NA         | 0.2                | 0.1, 1.0   | 0.0        | NA         | 0.0        | NA         | 0.0        | NA         | 0.         |            |                  |            |            |            |            |  |  |  |  |  |

| Gene symbol | Variant (dbSNP ID)* | Genotype   | Non-Hispanic white |            |            |             |            |            |            |            | Non-Hispanic black |            |            |            |            |            |            |            | Mexican-American |            |            |            |            |            |            |            |
|-------------|---------------------|------------|--------------------|------------|------------|-------------|------------|------------|------------|------------|--------------------|------------|------------|------------|------------|------------|------------|------------|------------------|------------|------------|------------|------------|------------|------------|------------|
|             |                     |            | Age (years)        |            |            |             |            |            |            |            | Age (years)        |            |            |            |            |            |            |            | Age (years)      |            |            |            |            |            |            |            |
|             |                     |            | 12-19              |            | 20-39      |             | 40-59      |            | ≥ 60       |            | 12-19              |            | 20-39      |            | 40-59      |            | ≥ 60       |            | 12-19            |            | 20-39      |            | 40-59      |            | ≥ 60       |            |
|             |                     |            | %                  | 95% CI     | %          | 95% CI      | %          | 95% CI     | %          | 95% CI     | %                  | 95% CI     | %          | 95% CI     | %          | 95% CI     | %          | 95% CI     | %                | 95% CI     | %          | 95% CI     | %          | 95% CI     | %          | 95% CI     |
| CAT         | rs769214            | AA         | 44.8               | 37.2, 52.7 | 43.8       | 36.7, 51.2  | 41.6       | 33.9, 49.7 | 45.2       | 42.5, 47.9 | 31.8               | 27.1, 36.8 | 34.9       | 31.9, 37.9 | 36.7       | 31.6, 42.2 | 36.8       | 30.1, 44.1 | 23.6             | 17.6, 30.8 | 23.6       | 20.0, 27.5 | 24.6       | 19.5, 30.4 | 25.9       | 19.8, 33.2 |
|             |                     | AG         | 46.1               | 40.8, 51.5 | 44.0       | 37.5, 50.8  | 46.9       | 41.1, 52.7 | 43.8       | 41.1, 46.5 | 53.0               | 46.0, 59.8 | 46.7       | 43.0, 50.5 | 47.7       | 42.5, 52.9 | 42.6       | 36.0, 49.6 | 55.9             | 47.8, 63.7 | 52.1       | 46.4, 57.7 | 47.0       | 40.4, 53.8 | 48.3       | 42.0, 54.7 |
|             |                     | GG         | 9.1                | 5.2, 15.4  | 12.2       | 9.4, 15.6   | 11.6       | 7.5, 17.3  | 11.1       | 9.5, 12.8  | 15.2               | 11.9, 19.3 | 18.4       | 15.0, 22.4 | 15.6       | 12.2, 19.6 | 20.5       | 15.8, 26.2 | 20.5             | 17.1, 24.4 | 24.3       | 21.2, 27.8 | 28.0       | 23.2, 34.3 | 25.7       | 21.9, 30.0 |
| CBS         | 844ins68bp          | ++         | 1.2                | 0.3, 4.5   | 0.4        | 0.2, 1.2    | 0.2        | 0.0, 0.9   | 0.5        | 0.2, 1.1   | 8.5                | 5.8, 12.4  | 6.3        | 4.1, 9.7   | 6.2        | 4.4, 8.6   | 6.7        | 4.7, 9.6   | 0.1              | 0.0, 0.7   | 0.5        | 0.2, 1.3   | 0.4        | 0.1, 3.2   | 0.0        | NA         |
|             |                     | + -        | 14.9               | 11.4, 19.1 | 15.7       | 12.7, 19.2  | 16.2       | 11.5, 22.4 | 13.7       | 11.3, 16.4 | 38.2               | 32.7, 44.1 | 39.4       | 35.7, 43.3 | 37.7       | 32.4, 43.4 | 35.7       | 29.4, 42.6 | 15.9             | 12.0, 20.8 | 10.8       | 9.2, 12.6  | 10.3       | 7.9, 13.2  | 13.0       | 9.3, 18.0  |
|             |                     | --         | 83.9               | 79.2, 87.8 | 83.9       | 80.3, 87.0  | 83.6       | 77.5, 88.3 | 85.9       | 83.2, 88.2 | 53.3               | 46.2, 60.2 | 54.3       | 50.4, 58.1 | 56.1       | 50.2, 61.8 | 57.5       | 50.6, 64.2 | 84.0             | 79.1, 87.9 | 88.7       | 87.1, 90.1 | 89.3       | 86.2, 91.8 | 87.0       | 82.0, 90.7 |
| CCL5        | rs2280788*          | CC         | 95.9               | 90.4, 98.3 | 93.1       | 91.4, 94.4  | 95.1       | 93.0, 96.6 | 95.7       | 94.1, 96.9 | 98.9               | 97.2, 99.6 | 98.5       | 96.8, 99.3 | 98.5       | 96.1, 99.4 | 99.4       | 97.4, 99.9 | 96.3             | 92.5, 98.2 | 97.8       | 96.4, 98.7 | 97.3       | 95.9, 98.2 | 97.7       | 95.1, 99.0 |
|             |                     | CG         | 4.1                | 1.7, 9.6   | 6.7        | 5.4, 8.3    | 4.7        | 3.2, 7.0   | 4.0        | 3.0, 5.4   | 1.1                | 0.4, 2.8   | 1.5        | 0.7, 3.2   | 1.5        | 0.6, 3.9   | 0.6        | 0.1, 2.6   | 3.7              | 1.8, 7.5   | 2.2        | 1.3, 3.6   | 2.7        | 1.8, 4.1   | 2.3        | 1.0, 4.9   |
|             |                     | GG         | 0.0                | NA         | 0.2        | 0.0, 0.8    | 0.2        | 0.0, 1.0   | 0.2        | 0.1, 0.9   | 0.0                | NA         | 0.0        | NA         | 0.0        | NA         | 0.0        | NA         | 0.0              | NA         | 0.0        | NA         | 0.0        | NA         | 0.0        | NA         |
| CCR2        | rs1799864           | AA         | 0.4                | 0.1, 2.3   | 1.5        | 0.6, 3.9    | 1.2        | 0.5, 3.0   | 1.1        | 0.5, 2.8   | 1.2                | 0.4, 3.7   | 2.0        | 1.3, 3.1   | 1.4        | 0.5, 3.9   | 1.7        | 0.8, 3.4   | 3.5              | 2.0, 6.1   | 5.1        | 3.5, 7.4   | 4.9        | 2.3, 10.0  | 3.0        | 1.4, 6.4   |
|             |                     | AG         | 19.8               | 15.0, 25.6 | 15.8       | 12.4, 19.9  | 15.8       | 12.6, 19.5 | 17.0       | 14.6, 19.8 | 25.6               | 21.9, 29.8 | 26.5       | 23.8, 29.4 | 23.6       | 19.7, 28.1 | 26.9       | 21.5, 32.9 | 32.0             | 25.2, 39.7 | 37.1       | 34.6, 39.8 | 32.0       | 27.0, 37.4 | 29.3       | 22.8, 36.9 |
|             |                     | GG         | 79.8               | 73.7, 84.7 | 82.7       | 78.5, 86.2  | 83.0       | 79.0, 86.4 | 81.8       | 78.7, 84.6 | 73.2               | 69.0, 77.0 | 71.5       | 68.6, 74.2 | 75.0       | 70.2, 79.1 | 71.5       | 65.3, 77.0 | 64.5             | 56.8, 71.5 | 57.8       | 54.5, 61.0 | 63.1       | 58.9, 67.2 | 67.6       | 60.0, 74.5 |
| CXCL12      | rs169097            | CC         | 98.6               | 95.0, 99.6 | 99.8       | 98.8, 100.0 | 99.2       | 98.5, 99.6 | 99.6       | 98.7, 99.9 | 67.5               | 62.0, 72.6 | 68.2       | 62.6, 73.4 | 69.5       | 63.7, 74.8 | 68.0       | 61.6, 73.7 | 96.9             | 94.8, 98.2 | 98.2       | 96.3, 99.2 | 98.4       | 97.6, 99.0 | 99.1       | 98.0, 99.6 |
|             |                     | CT         | 1.4                | 0.4, 5.0   | 0.2        | 0.0, 1.2    | 0.7        | 0.3, 1.5   | 0.4        | 0.1, 1.3   | 29.7               | 25.0, 34.9 | 28.0       | 23.6, 32.8 | 29.0       | 23.7, 35.0 | 30.8       | 25.3, 37.0 | 3.1              | 1.8, 5.2   | 1.8        | 0.8, 3.7   | 1.6        | 1.0, 2.4   | 0.9        | 0.4, 2.0   |
|             |                     | TT         | 0.0                | NA         | 0.0        | NA          | 0.1        | 0.0, 0.5   | 0.0        | NA         | 2.8                | 1.5, 5.1   | 3.8        | 2.4, 6.0   | 1.5        | 0.9, 2.5   | NA         | 1.2        | 0.3, 4.0         | 0.0        | NA         | 0.0        | NA         | 0.0        | NA         |            |
| CYP11A1     | rs2472299           | CC         | 54.1               | 45.5, 62.5 | 52.1       | 48.2, 55.9  | 52.9       | 49.6, 56.3 | 53.3       | 49.6, 56.9 | 40.6               | 35.7, 45.8 | 37.8       | 34.2, 41.7 | 36.1       | 30.5, 42.0 | 36.1       | 28.6, 44.3 | 53.5             | 46.8, 60.1 | 53.8       | 50.6, 57.0 | 56.4       | 48.6, 63.9 | 49.0       | 43.1, 55.0 |
|             |                     | CT         | 37.2               | 29.9, 45.2 | 38.5       | 35.1, 42.1  | 37.4       | 33.5, 41.6 | 37.8       | 34.1, 41.6 | 48.8               | 43.8, 54.0 | 48.0       | 43.9, 52.2 | 46.5       | 41.6, 51.4 | 47.7       | 38.4, 57.2 | 38.1             | 32.4, 44.1 | 38.5       | 35.8, 41.3 | 38.2       | 30.5, 46.4 | 43.9       | 37.7, 50.3 |
|             |                     | TT         | 8.7                | 6.1, 12.3  | 9.4        | 6.8, 12.8   | 9.6        | 7.2, 12.6  | 9.0        | 7.5, 10.7  | 10.5               | 7.8, 14.1  | 14.1       | 11.4, 17.5 | 17.5       | 13.6, 22.1 | 16.2       | 10.3, 24.5 | 8.4              | 4.8, 14.4  | 7.7        | 5.7, 10.2  | 5.5        | 3.6, 8.2   | 7.1        | 4.4, 11.1  |
|             | rs2606345           | GG         | 12.8               | 8.9, 18.1  | 10.5       | 7.4, 14.6   | 12.3       | 9.2, 16.2  | 10.1       | 8.2, 12.4  | 71.7               | 66.1, 76.8 | 69.8       | 64.3, 74.7 | 74.9       | 67.7, 80.9 | 65.4       | 58.4, 71.8 | 38.4             | 31.0, 46.3 | 40.3       | 36.5, 44.2 | 35.6       | 27.6, 44.6 | 34.3       | 30.8, 38.0 |
|             |                     | GT         | 45.7               | 36.9, 54.7 | 46.7       | 41.5, 51.9  | 41.5       | 37.9, 45.2 | 47.0       | 43.4, 50.6 | 25.2               | 20.2, 31.0 | 27.7       | 23.2, 32.7 | 22.6       | 17.4, 28.9 | 31.8       | 26.1, 38.2 | 45.2             | 38.0, 52.5 | 45.3       | 42.1, 48.5 | 50.7       | 41.5, 59.9 | 46.4       | 39.6, 53.3 |
| TT          | 41.5                | 34.0, 49.4 | 42.9               | 38.2, 47.6 | 46.2       | 41.8, 50.7  | 42.9       | 39.7, 46.2 | 3.0        | 1.8, 5.2   | 2.5                | 1.4, 4.2   | 2.5        | 1.4, 4.5   | 2.8        | 0.9, 7.9   | 16.5       | 12.9, 20.8 | 14.4             | 11.9, 17.2 | 13.7       | 10.5, 17.6 | 19.3       | 13.8, 26.3 |            |            |
| CYP11A2     | rs11854147          | CC         | 52.2               | 44.3, 59.9 | 48.2       | 44.5, 51.9  | 49.2       | 45.8, 52.7 | 49.0       | 46.2, 51.8 | 6.3                | 4.4, 9.0   | 9.9        | 7.5, 13.1  | 7.8        | 5.3, 11.4  | 8.8        | 6.1, 12.5  | 15.1             | 9.9, 22.3  | 14.9       | 12.6, 17.6 | 22.1       | 15.3, 30.9 | 14.6       | 11.6, 18.1 |
|             |                     | CT         | 36.8               | 29.8, 44.4 | 40.3       | 37.3, 43.4  | 38.6       | 35.4, 41.9 | 38.5       | 34.8, 42.2 | 36.9               | 30.2, 44.3 | 39.2       | 35.7, 42.7 | 36.3       | 32.1, 40.7 | 43.6       | 34.2, 53.5 | 44.2             | 37.5, 51.1 | 44.9       | 40.8, 49.0 | 42.2       | 36.3, 48.4 | 47.6       | 41.6, 53.6 |
|             |                     | TT         | 11.0               | 7.5, 15.9  | 11.5       | 8.9, 14.7   | 12.2       | 9.4, 15.6  | 12.6       | 10.6, 14.9 | 56.7               | 48.4, 64.6 | 50.9       | 47.7, 54.1 | 55.9       | 52.1, 59.7 | 47.5       | 37.1, 58.2 | 40.7             | 35.9, 45.7 | 40.2       | 35.5, 45.1 | 35.6       | 27.7, 44.4 | 37.9       | 31.6, 44.6 |
|             | rs2069514           | AA         | 0.2                | 0.0, 1.9   | 0.0        | NA          | 0.4        | 0.0, 2.9   | 0.0        | NA         | 8.8                | 6.0, 12.6  | 5.2        | 3.5, 7.7   | 7.5        | 5.5, 10.2  | 4.3        | 2.2, 8.2   | 14.4             | 9.0, 22.1  | 11.8       | 9.4, 14.8  | 10.5       | 6.6, 16.4  | 13.7       | 9.6, 19.1  |
|             |                     | AG         | 3.5                | 1.2, 9.9   | 3.3        | 1.3, 8.2    | 1.7        | 0.9, 3.2   | 3.5        | 2.7, 4.7   | 43.6               | 37.7, 49.7 | 39.4       | 34.2, 44.8 | 39.4       | 34.3, 44.8 | 37.9       | 31.3, 44.9 | 40.3             | 31.9, 49.3 | 44.8       | 41.7, 48.1 | 43.9       | 39.2, 48.8 | 34.9       | 28.5, 41.9 |
|             | rs4886406           | GG         | 96.2               | 90.0, 98.6 | 96.7       | 91.8, 98.7  | 97.9       | 96.7, 98.7 | 96.5       | 95.3, 97.3 | 47.7               | 42.1, 53.3 | 53.4       | 50.9, 59.9 | 53.1       | 47.9, 58.2 | 57.8       | 51.6, 63.8 | 45.3             | 35.3, 55.7 | 43.3       | 40.4, 46.3 | 45.5       | 39.2, 52.0 | 51.4       | 43.2, 59.6 |
|             |                     | GT         | 7.9                | 4.9, 12.5  | 8.8        | 6.6, 11.6   | 8.4        | 5.6, 12.5  | 7.8        | 6.5, 9.4   | 9.0                | 7.0, 11.3  | 13.6       | 11.2, 16.4 | 17.1       | 12.9, 22.3 | 15.8       | 10.3, 23.5 | 7.8              | 5.7, 10.6  | 8.0        | 5.7, 11.1  | 5.0        | 3.3, 7.6   | 6.9        | 4.4, 10.7  |
| TT          | 37.3                | 30.4, 44.7 | 39.4               | 36.5, 42.3 | 39.0       | 34.5, 43.7  | 38.9       | 35.3, 42.6 | 51.1       | 44.0, 58.1 | 47.1               | 43.5, 50.8 | 48.9       | 43.3, 54.6 | 51.1       | 42.9, 59.3 | 36.5       | 30.9, 42.5 | 39.0             | 36.3, 41.7 | 38.9       | 32.6, 45.6 | 41.2       | 37.0, 45.6 |            |            |
| TT          | 54.8                | 47.4, 62.0 | 51.8               | 48.5, 55.1 | 52.6       | 48.8, 56.3  | 53.3       | 49.7, 56.8 | 40.0       | 33.5, 46.9 | 39.3               | 35.4, 43.4 | 34.0       | 28.5, 40.0 | 33.1       | 26.5, 40.3 | 55.7       | 49.9, 61.4 | 53.0             | 49.7, 56.3 | 56.0       | 49.6, 62.3 | 51.8       | 47.2, 56.4 |            |            |
| CYP11B1     | rs1056836           | CC         | 27.1               | 21.5, 33.6 | 31.4       | 27.4, 35.7  | 29.1       | 24.7, 33.8 | 33.7       | 29.7, 38.0 | 6.2                | 3.7, 10.1  | 6.6        | 4.8, 9.1   | 5.2        | 3.4, 7.9   | 4.7        | 2.4, 9.2   | 56.2             | 51.4, 60.9 | 54.4       | 50.5, 58.3 | 55.2       | 49.6, 60.6 | 58.4       | 53.0, 63.6 |
|             |                     | CG         | 48.6               | 41.9, 55.3 | 48.2       | 44.1, 52.3  | 48.3       | 44.3, 52.4 | 47.6       | 42.8, 52.5 | 40.2               | 34.6, 46.1 | 37.1       | 32.5, 41.8 | 37.5       | 33.9, 41.1 | 40.2       | 34.8, 46.0 | 33.9             | 29.1, 39.0 | 36.9       | 34.2, 39.6 | 37.9       | 32.4, 43.6 | 36.0       | 30.7, 41.8 |
|             |                     | GG         | 24.3               | 17.0, 33.4 | 20.4       | 16.9, 24.3  | 22.6       | 18.3, 27.5 | 18.6       | 15.1, 22.7 | 53.6               | 48.1, 59.1 | 56.4       | 51.9, 60.7 | 57.3       | 53.0, 61.4 | 55.0       | 48.3, 61.6 | 9.9              | 7.3, 13.3  | 8.7        | 6.7, 11.4  | 7.0        | 4.8, 10.0  | 5.6        | 2.6, 11.6  |
|             | rs1056837           | CC         | 27.0               | 21.2, 33.7 | 31.5       | 27.7, 35.6  | 29.1       | 24.9, 33.6 | 35.1       | 30.9, 39.5 | 7.8                | 5.2, 11.4  | 7.6        | 5.5, 10.4  | 6.9        | 4.8, 10.0  | 6.0        | 3.4, 10.4  | 57.5             | 53.2, 61.8 | 54.8       | 50.6, 58.8 | 56.0       | 50.5, 61.3 | 58.9       | 53.5, 64.1 |
|             |                     | CT         | 48.0               | 41.9, 54.2 | 48.2       | 44.0, 52.3  | 48.3       | 44.5, 52.2 | 47.0       | 42.0, 52.1 | 43.5               | 39.3, 47.8 | 38.1       | 32.7, 43.8 | 39.8       | 35.1, 44.8 | 42.3       | 38.1, 46.6 | 32.0             | 27.4, 37.1 | 36.7       | 34.2, 39.2 | 36.0       | 30.7, 41.6 | 35.8       | 30.2, 41.7 |
|             | TT                  | 25.0       | 18.0, 33.7         | 20.3       | 17.1, 24.0 | 22.6        | 18.3, 27.4 | 17.9       | 14.5, 21.9 | 48.7       | 44.3, 53.2         | 54.3       | 49.2, 59.3 | 53.2       | 47.8, 58.6 | 51.6       | 45.7, 57.5 | 10.4       | 7.6, 14.2        | 8.6        | 6.1, 11.9  | 8.1        | 5.8, 11.1  | 5.3        | 2.6, 10.6  |            |
| rs162557    | CC                  | 61.6       | 55.8, 67.2         | 60.6       | 56.9, 64.1 | 57.0        | 50.3, 63.5 | 58.3       | 54.9, 61.6 | 63.8       | 57.7, 69.5         | 61.0       | 56.2, 65.7 | 61.5       | 57.3, 65.6 | 57.9       | 52.8, 62.9 | 71.4       | 66.2, 76.1       | 76.8       | 73.0, 80.2 | 74.8       | 69.9, 79.2 | 80.8       | 75.7, 85.1 |            |
|             | CT                  | 35.3       | 29.4, 41.7         | 33.4       | 28.7, 38.4 | 36.6        | 31.2, 42.3 | 36.5       | 33.2, 40.0 | 31.8       | 26.1, 38.1         | 33.3       | 28.6, 38.4 | 34.8       | 30.4, 39.5 | 39.2       | 34.4, 44.3 | 25.9       | 21.5, 30.9       | 21.8       | 18.2, 26.0 | 23.1       | 19.0, 27.7 | 18.4       | 13.7, 24.1 |            |
|             | TT                  | 3.1        | 1.4, 6.4           | 6.0        | 3.9, 9.1   | 6.4         | 4.2, 9.7   | 5.2        | 3.7, 7.3   | 4.3        | 2.3, 7.9           | 5.6        | 3.8, 8.3   | 3.7        | 2.3, 5.8   | 2.9        | 1.5, 5.3   | 2.7        | 1.3, 5.5         | 1.3        | 0.8, 2.2   | 2.1        | 1.0, 4.5   | 0.8        | 0.2, 2.9   |            |
| CYP2A6      | rs1801272*          | AA         | 0.3                | 0.0, 2.4   | 0.1        | 0.0, 0.9    | 0.0        | NA         | 0.0        | NA         | 0.0                | NA         | 0.0        | NA         | 0.0        | NA         | 0.0        | NA         | 0.0              | NA         | 0.0        | NA         | 0.0        | NA         | 0.0        | NA         |
|             |                     | AT         | 7.1                | 4.5, 10.8  | 5.9        | 4.5, 7.6    | 8.0        | 6.0, 10.6  | 4.7        | 3.2, 6.9   | 0.9                | 0.3, 2.4   | 0.8        | 0.4, 1.4   | 2.1        | 1.0, 4.5   | 1.4        | 0.4, 4.1   | 3.1              | 1.9, 4.9   | 4.6        | 3.0, 6.9   | 3.5        | 2.4, 5.0   | 3.4        | 1.5, 7.5   |
|             |                     | TT         | 92.6               | 89.0,      |            |             |            |            |            |            |                    |            |            |            |            |            |            |            |                  |            |            |            |            |            |            |            |

| Gene symbol | Variant (dbSNP ID)* | Genotype | Non-Hispanic white |            |       |            |       |            |      |            | Non-Hispanic black |            |       |            |       |            |      |             | Mexican-American |            |       |            |       |            |      |            |     |    |
|-------------|---------------------|----------|--------------------|------------|-------|------------|-------|------------|------|------------|--------------------|------------|-------|------------|-------|------------|------|-------------|------------------|------------|-------|------------|-------|------------|------|------------|-----|----|
|             |                     |          | Age (years)        |            |       |            |       |            |      |            | Age (years)        |            |       |            |       |            |      |             | Age (years)      |            |       |            |       |            |      |            |     |    |
|             |                     |          | 12-19              |            | 20-39 |            | 40-59 |            | ≥ 60 |            | 12-19              |            | 20-39 |            | 40-59 |            | ≥ 60 |             | 12-19            |            | 20-39 |            | 40-59 |            | ≥ 60 |            |     |    |
|             |                     |          | %                  | 95% CI     | %     | 95% CI     | %     | 95% CI     | %    | 95% CI     | %                  | 95% CI     | %     | 95% CI     | %     | 95% CI     | %    | 95% CI      | %                | 95% CI     | %     | 95% CI     | %     | 95% CI     | %    | 95% CI     |     |    |
| CYP2E1      | rs2031920           | CC       | 95.5               | 92.7, 97.3 | 96.0  | 92.9, 97.8 | 95.7  | 93.3, 97.3 | 95.0 | 93.0, 96.5 | 98.6               | 97.0, 99.4 | 98.6  | 97.9, 99.1 | 98.3  | 96.3, 99.2 | 98.3 | 94.8, 99.5  | 82.1             | 79.3, 84.6 | 77.7  | 75.1, 80.2 | 82.2  | 76.7, 86.6 | 79.7 | 72.6, 85.3 |     |    |
|             |                     | CT       | 3.9                | 1.8, 8.4   | 4.0   | 2.2, 7.1   | 4.3   | 2.7, 6.7   | 4.7  | 3.3, 6.8   | 1.4                | 0.6, 3.0   | 1.4   | 0.9, 2.1   | 1.7   | 0.8, 3.7   | 1.7  | 0.5, 5.2    | 16.6             | 14.3, 19.2 | 21.4  | 18.5, 24.5 | 16.6  | 12.6, 21.7 | 19.8 | 14.1, 27.1 |     |    |
|             |                     | TT       | 0.5                | 0.1, 3.6   | 0.0   | NA         | 0.0   | NA         | 0.2  | 0.0, 1.1   | 0.0                | NA         | 0.0   | NA         | 0.0   | NA         | 0.0  | NA          | 1.3              | 0.4, 4.3   | 0.9   | 0.3, 2.7   | 1.2   | 0.4, 3.5   | 0.5  | 0.2, 1.8   |     |    |
| CYP3A4      | rs2740574*          | AA       | 95.5               | 92.1, 97.5 | 92.3  | 89.0, 94.7 | 92.2  | 89.2, 94.4 | 90.9 | 89.4, 92.3 | 15.3               | 11.9, 19.3 | 13.3  | 11.0, 16.0 | 14.4  | 11.0, 18.6 | 11.9 | 9.5, 14.7   | 84.5             | 81.7, 87.0 | 85.1  | 82.1, 87.6 | 86.2  | 82.3, 89.4 | 87.4 | 80.1, 92.3 |     |    |
|             |                     | AG       | 4.5                | 2.5, 7.9   | 7.4   | 5.1, 10.6  | 6.6   | 4.4, 9.8   | 8.9  | 7.5, 10.4  | 38.6               | 34.0, 43.3 | 46.5  | 43.2, 49.7 | 44.1  | 37.9, 50.4 | 47.0 | 40.6, 53.6  | 15.5             | 13.0, 18.3 | 13.9  | 11.6, 16.6 | 13.1  | 10.3, 16.6 | 11.2 | 7.0, 17.5  |     |    |
|             |                     | GG       | 0.0                | NA         | 0.3   | 0.0, 2.7   | 1.2   | 0.4, 3.8   | 0.2  | 0.0, 1.1   | 46.2               | 41.1, 51.3 | 40.2  | 37.2, 43.3 | 41.6  | 35.9, 47.5 | 41.1 | 35.6, 46.9  | 0.0              | NA         | 1.0   | 0.5, 2.3   | 0.6   | 0.1, 3.2   | 1.4  | 0.3, 5.6   |     |    |
| F2          | rs1799963           | AA       | 0.0                | NA         | 0.0   | NA         | 0.0   | NA         | 0.0  | NA         | 0.0                | NA         | 0.0   | NA         | 0.0   | NA         | 0.0  | NA          | 0.0              | NA         | 0.0   | NA         | 0.0   | NA         | 0.0  | NA         | 0.0 | NA |
|             |                     | AG       | 1.9                | 0.8, 4.2   | 1.4   | 0.6, 3.2   | 3.2   | 1.8, 5.6   | 2.8  | 1.9, 4.1   | 0.6                | 0.2, 2.4   | 0.5   | 0.2, 1.6   | 0.4   | 0.1, 1.6   | 0.5  | 0.1, 2.1    | 1.8              | 0.6, 5.4   | 2.4   | 1.4, 3.9   | 2.0   | 1.1, 3.7   | 2.9  | 1.1, 7.2   |     |    |
|             |                     | GG       | 98.1               | 95.8, 99.2 | 98.6  | 96.8, 99.4 | 96.8  | 94.4, 98.2 | 97.2 | 95.9, 98.1 | 99.4               | 97.6, 99.8 | 99.5  | 98.4, 99.8 | 99.6  | 98.4, 99.9 | 99.5 | 97.9, 99.9  | 98.2             | 94.6, 99.4 | 97.6  | 96.1, 98.6 | 98.0  | 96.3, 98.9 | 97.1 | 92.8, 98.9 |     |    |
| F5          | rs6025‡             | AA       | 0.0                | NA         | 0.0   | NA         | 0.0   | NA         | 0.1  | 0.0, 0.6   | 0.0                | NA         | 0.0   | NA         | 0.0   | NA         | 0.0  | NA          | 0.0              | NA         | 0.1   | 0.0, 0.7   | 0.0   | NA         | 0.0  | NA         | 0.0 | NA |
|             |                     | AG       | 5.5                | 3.4, 8.8   | 4.4   | 2.6, 7.6   | 6.8   | 5.1, 9.0   | 4.0  | 2.4, 6.6   | 1.7                | 0.7, 4.3   | 1.1   | 0.6, 2.3   | 1.6   | 0.6, 4.2   | 0.3  | 0.0, 2.4    | 2.8              | 1.1, 6.8   | 1.7   | 1.0, 2.8   | 1.9   | 0.7, 4.7   | 2.1  | 0.7, 5.8   |     |    |
|             |                     | GG       | 94.5               | 91.2, 96.6 | 95.6  | 92.4, 97.4 | 93.2  | 91.0, 94.9 | 95.9 | 93.3, 97.5 | 98.3               | 95.7, 99.3 | 98.9  | 97.7, 99.4 | 98.4  | 95.8, 99.4 | 99.7 | 97.6, 100.0 | 97.2             | 93.2, 98.9 | 98.2  | 97.1, 98.9 | 98.1  | 95.3, 99.3 | 97.9 | 94.2, 99.3 |     |    |
| FAM82A      | rs163086*           | CC       | 53.3               | 44.5, 61.9 | 59.3  | 54.5, 63.9 | 59.7  | 54.2, 65.0 | 64.6 | 61.2, 67.8 | 60.7               | 54.9, 66.3 | 65.5  | 60.8, 69.9 | 65.6  | 62.7, 68.3 | 68.3 | 61.2, 74.6  | 74.6             | 68.1, 80.1 | 73.1  | 70.3, 75.7 | 74.0  | 69.4, 78.1 | 71.3 | 63.4, 78.1 |     |    |
|             |                     | CT       | 37.6               | 31.3, 44.3 | 35.1  | 30.6, 39.8 | 35.5  | 30.7, 40.6 | 31.4 | 28.6, 34.4 | 35.4               | 30.2, 41.1 | 31.6  | 27.3, 36.2 | 30.3  | 27.3, 33.6 | 29.7 | 22.9, 37.4  | 23.5             | 18.4, 29.5 | 23.9  | 21.7, 26.3 | 24.0  | 19.1, 29.6 | 26.5 | 20.5, 33.5 |     |    |
|             |                     | TT       | 9.2                | 5.9, 14.0  | 5.6   | 3.9, 8.0   | 4.8   | 3.0, 7.4   | 4.0  | 2.6, 6.1   | 3.8                | 2.2, 6.6   | 2.9   | 1.6, 5.3   | 4.1   | 2.4, 7.0   | 2.1  | 0.8, 5.5    | 1.9              | 1.0, 3.5   | 3.0   | 2.0, 4.4   | 2.0   | 1.1, 3.6   | 2.2  | 1.2, 4.3   |     |    |
| FCGR2A      | rs1801274           | AA       | 26.4               | 20.4, 33.4 | 23.3  | 20.8, 26.1 | 25.8  | 22.0, 29.8 | 25.7 | 22.8, 28.8 | 25.1               | 20.0, 30.9 | 20.1  | 17.5, 23.0 | 21.5  | 18.5, 25.0 | 22.9 | 18.0, 28.7  | 29.8             | 27.0, 32.7 | 23.1  | 20.3, 26.1 | 21.9  | 17.1, 27.5 | 17.6 | 13.2, 23.0 |     |    |
|             |                     | AG       | 52.1               | 46.4, 57.8 | 48.4  | 43.6, 53.3 | 51.3  | 46.9, 55.7 | 44.8 | 41.8, 47.8 | 50.3               | 45.5, 55.2 | 53.5  | 49.0, 57.9 | 48.4  | 42.8, 54.1 | 51.0 | 46.2, 55.7  | 47.1             | 42.8, 51.5 | 49.1  | 44.6, 53.5 | 51.3  | 45.8, 56.9 | 56.5 | 50.0, 62.8 |     |    |
|             |                     | GG       | 21.5               | 16.2, 27.9 | 28.2  | 24.2, 32.6 | 22.9  | 18.9, 27.5 | 29.6 | 25.8, 33.6 | 24.6               | 20.5, 29.2 | 26.4  | 22.4, 30.8 | 30.0  | 25.1, 35.4 | 26.1 | 20.8, 32.1  | 23.1             | 19.7, 26.9 | 27.9  | 25.2, 30.7 | 26.8  | 22.5, 31.6 | 26.0 | 18.5, 35.2 |     |    |
| FGB         | rs1800790           | AA       | 3.9                | 1.9, 7.8   | 2.8   | 2.0, 4.1   | 3.3   | 2.2, 5.0   | 4.3  | 2.9, 6.2   | 0.4                | 0.1, 1.8   | 0.6   | 0.2, 1.6   | 0.9   | 0.3, 3.0   | 0.6  | 0.1, 3.0    | 3.5              | 1.8, 6.7   | 2.4   | 1.4, 3.8   | 2.5   | 1.0, 5.7   | 1.0  | 0.3, 3.5   |     |    |
|             |                     | AG       | 33.0               | 25.4, 41.6 | 34.2  | 31.4, 37.0 | 29.4  | 25.2, 34.0 | 31.0 | 28.6, 33.5 | 12.1               | 8.5, 16.9  | 9.9   | 7.6, 12.7  | 9.7   | 7.2, 12.9  | 6.9  | 4.4, 10.5   | 24.7             | 19.4, 30.8 | 26.4  | 21.3, 32.3 | 21.6  | 19.4, 24.1 | 25.1 | 21.0, 29.6 |     |    |
|             |                     | GG       | 63.1               | 53.8, 71.6 | 63.0  | 59.8, 66.0 | 67.3  | 62.8, 71.5 | 64.7 | 62.4, 66.9 | 87.5               | 82.7, 91.2 | 89.6  | 86.8, 91.8 | 89.4  | 86.1, 92.0 | 92.5 | 89.1, 94.9  | 71.9             | 66.5, 76.7 | 71.2  | 65.4, 76.4 | 75.9  | 73.7, 78.0 | 73.9 | 68.8, 78.4 |     |    |
| IL10        | rs1800871           | CC       | 62.3               | 53.3, 70.5 | 56.1  | 51.8, 60.3 | 60.5  | 54.9, 65.8 | 57.4 | 53.2, 61.4 | 37.7               | 33.2, 42.4 | 37.0  | 34.3, 39.7 | 35.4  | 29.9, 41.2 | 34.4 | 27.1, 42.4  | 39.0             | 34.2, 44.1 | 41.2  | 35.2, 47.5 | 35.3  | 30.3, 40.7 | 37.5 | 31.2, 44.3 |     |    |
|             |                     | CT       | 27.7               | 20.6, 36.0 | 36.4  | 31.1, 42.0 | 35.4  | 30.7, 40.3 | 35.7 | 32.1, 39.4 | 45.8               | 42.2, 49.4 | 48.6  | 45.8, 51.4 | 47.5  | 41.4, 53.6 | 50.8 | 42.1, 59.6  | 46.1             | 38.0, 54.5 | 43.4  | 40.0, 47.0 | 48.3  | 44.8, 51.7 | 48.0 | 38.7, 57.3 |     |    |
|             |                     | TT       | 10.0               | 6.6, 14.9  | 7.5   | 4.7, 11.8  | 4.2   | 2.7, 6.3   | 7.0  | 4.9, 9.9   | 16.5               | 12.6, 21.3 | 14.5  | 11.9, 17.5 | 17.2  | 14.0, 20.8 | 14.8 | 11.1, 19.5  | 14.8             | 10.1, 21.3 | 15.3  | 12.1, 19.3 | 16.4  | 12.3, 21.5 | 14.5 | 10.6, 19.6 |     |    |
|             | rs1800872           | AA       | 10.1               | 6.7, 14.9  | 7.6   | 4.8, 12.0  | 4.5   | 3.0, 6.8   | 6.9  | 4.8, 9.9   | 16.6               | 13.2, 20.7 | 14.0  | 11.5, 16.8 | 16.6  | 12.7, 21.2 | 13.6 | 9.8, 18.7   | 14.2             | 9.7, 20.5  | 15.1  | 11.9, 19.0 | 16.3  | 12.4, 21.1 | 14.1 | 10.2, 19.2 |     |    |
|             |                     | AC       | 28.0               | 21.0, 36.3 | 36.4  | 31.1, 42.0 | 35.4  | 31.0, 40.1 | 35.7 | 31.7, 40.0 | 45.5               | 41.7, 49.2 | 48.9  | 46.1, 51.8 | 48.1  | 41.7, 54.6 | 51.9 | 42.6, 61.1  | 46.7             | 39.0, 54.5 | 43.5  | 39.9, 47.2 | 48.5  | 44.9, 52.0 | 48.6 | 39.7, 57.5 |     |    |
|             |                     | CC       | 61.9               | 52.9, 70.2 | 55.9  | 51.5, 60.3 | 60.1  | 54.5, 65.5 | 57.3 | 53.2, 61.4 | 38.0               | 33.5, 42.7 | 37.1  | 34.5, 39.8 | 35.3  | 29.9, 41.2 | 34.5 | 27.1, 42.7  | 39.1             | 34.3, 44.1 | 41.4  | 35.5, 47.5 | 35.2  | 30.1, 40.7 | 37.3 | 31.3, 43.8 |     |    |
|             | rs1800896           | AA       | 29.2               | 21.9, 37.7 | 30.9  | 27.7, 34.4 | 26.4  | 21.6, 31.9 | 27.3 | 23.6, 31.3 | 40.2               | 34.6, 46.2 | 40.5  | 34.0, 47.5 | 40.3  | 35.0, 45.8 | 41.5 | 34.7, 48.7  | 46.7             | 40.3, 53.3 | 48.2  | 43.3, 53.1 | 51.5  | 41.2, 61.7 | 49.1 | 41.4, 56.8 |     |    |
|             |                     | AG       | 47.4               | 40.1, 54.8 | 46.5  | 41.9, 51.1 | 50.4  | 45.5, 55.2 | 52.3 | 48.6, 55.9 | 46.1               | 40.7, 51.5 | 48.7  | 42.8, 54.6 | 47.3  | 43.4, 51.3 | 46.6 | 39.2, 54.2  | 42.8             | 35.1, 50.9 | 42.5  | 37.1, 48.1 | 38.8  | 30.4, 48.0 | 41.7 | 34.4, 49.4 |     |    |
|             |                     | GG       | 23.4               | 17.6, 30.5 | 22.5  | 19.4, 26.0 | 23.2  | 19.1, 27.9 | 20.4 | 17.8, 23.4 | 13.7               | 10.3, 17.8 | 10.8  | 9.0, 12.8  | 12.3  | 8.9, 16.8  | 11.8 | 8.9, 15.6   | 10.5             | 7.4, 14.5  | 9.4   | 7.0, 12.4  | 9.7   | 5.7, 16.0  | 9.2  | 6.3, 13.4  |     |    |
| IL1B        | rs1143623           | CC       | 9.4                | 5.3, 16.1  | 8.7   | 6.2, 12.0  | 10.3  | 7.5, 13.8  | 7.5  | 5.3, 10.4  | 0.8                | 0.4, 1.6   | 1.4   | 0.8, 2.6   | 1.1   | 0.3, 3.8   | 0.4  | 0.1, 3.6    | 17.9             | 14.8, 21.4 | 20.9  | 17.1, 25.3 | 19.1  | 13.8, 25.7 | 14.6 | 10.9, 19.3 |     |    |
|             |                     | CG       | 41.2               | 31.8, 51.2 | 38.3  | 35.3, 41.5 | 39.8  | 34.0, 45.9 | 38.2 | 34.1, 42.5 | 22.4               | 17.5, 28.1 | 21.7  | 18.4, 25.4 | 17.0  | 13.0, 22.0 | 19.2 | 13.6, 26.5  | 42.9             | 36.4, 49.7 | 47.9  | 44.5, 51.3 | 47.7  | 40.1, 55.5 | 50.9 | 44.6, 57.1 |     |    |
|             |                     | GG       | 49.4               | 39.0, 59.9 | 53.0  | 50.2, 55.8 | 50.0  | 43.1, 56.8 | 54.3 | 49.3, 59.3 | 76.9               | 71.1, 81.8 | 76.9  | 72.9, 80.5 | 81.9  | 76.4, 86.3 | 80.3 | 73.5, 85.7  | 39.2             | 34.1, 44.6 | 31.2  | 27.3, 35.3 | 33.2  | 25.9, 41.4 | 34.5 | 30.2, 39.2 |     |    |
| IL4         | rs2243248           | GG       | 0.8                | 0.1, 7.1   | 0.3   | 0.1, 0.7   | 0.5   | 0.1, 2.1   | 0.4  | 0.1, 1.3   | 2.7                | 1.3, 5.3   | 2.5   | 1.7, 3.7   | 2.7   | 1.1, 6.1   | 1.7  | 0.5, 5.1    | 1.8              | 0.8, 3.9   | 1.7   | 0.7, 4.2   | 2.5   | 1.0, 6.0   | 1.6  | 0.8, 3.3   |     |    |
|             |                     | GT       | 15.1               | 12.1, 18.6 | 14.4  | 11.3, 18.1 | 16.2  | 13.1, 19.9 | 10.4 | 8.7, 12.5  | 26.9               | 21.4, 33.2 | 28.3  | 26.0, 30.7 | 22.2  | 18.0, 27.1 | 28.6 | 22.3, 35.9  | 17.1             | 11.4, 24.8 | 23.9  | 20.0, 28.3 | 17.4  | 14.2, 21.2 | 13.7 | 10.0, 18.3 |     |    |
|             |                     | TT       | 84.2               | 79.5, 87.9 | 85.3  | 81.6, 88.4 | 83.3  | 79.5, 86.5 | 89.1 | 87.0, 90.9 | 70.4               | 62.6, 77.2 | 69.2  | 66.9, 71.4 | 75.2  | 70.2, 79.5 | 69.7 | 62.4, 76.2  | 81.1             | 72.4, 87.5 | 74.4  | 69.0, 79.1 | 80.1  | 75.4, 84.1 | 84.7 | 79.5, 88.8 |     |    |
|             | rs2243250           | CC       | 69.4               | 62.4, 75.6 | 72.1  | 68.6, 75.4 | 70.5  | 65.9, 74.7 | 69.8 | 65.8, 73.5 | 16.7               | 13.6, 20.4 | 13.1  | 10.6, 16.0 | 13.6  | 10.4, 17.7 | 14.7 | 9.9, 21.2   | 36.5             | 32.9, 40.3 | 32.5  | 26.3, 39.5 | 35.5  | 28.8, 42.8 | 36.3 | 31.0, 42.0 |     |    |
|             |                     | CT       | 27.9               |            |       |            |       |            |      |            |                    |            |       |            |       |            |      |             |                  |            |       |            |       |            |      |            |     |    |

| Gene symbol | Variant (dbSNP ID)* | Genotype  | Non-Hispanic white |            |            |            |            |            |            |            | Non-Hispanic black |            |            |            |            |            |            |            | Mexican-American |            |            |            |            |            |            |            |            |
|-------------|---------------------|-----------|--------------------|------------|------------|------------|------------|------------|------------|------------|--------------------|------------|------------|------------|------------|------------|------------|------------|------------------|------------|------------|------------|------------|------------|------------|------------|------------|
|             |                     |           | Age (years)        |            |            |            |            |            |            |            | Age (years)        |            |            |            |            |            |            |            | Age (years)      |            |            |            |            |            |            |            |            |
|             |                     |           | 12-19              |            | 20-39      |            | 40-59      |            | ≥ 60       |            | 12-19              |            | 20-39      |            | 40-59      |            | ≥ 60       |            | 12-19            |            | 20-39      |            | 40-59      |            | ≥ 60       |            |            |
|             |                     |           | %                  | 95% CI     | %          | 95% CI     | %          | 95% CI     | %          | 95% CI     | %                  | 95% CI     | %          | 95% CI     | %          | 95% CI     | %          | 95% CI     | %                | 95% CI     | %          | 95% CI     | %          | 95% CI     | %          | 95% CI     |            |
| ITGB3       | rs5918              | TT        | 22.1               | 15.9, 30.0 | 15.2       | 11.8, 19.5 | 18.6       | 15.0, 22.8 | 15.0       | 12.8, 17.4 | 8.6                | 6.5, 11.2  | 9.4        | 6.3, 13.7  | 5.5        | 4.0, 7.6   | 5.9        | 3.3, 10.4  | 20.6             | 16.8, 25.2 | 20.1       | 17.6, 22.9 | 16.9       | 12.6, 22.3 | 20.5       | 15.9, 26.0 |            |
|             |                     | CC        | 1.7                | 0.5, 5.2   | 3.1        | 1.6, 6.0   | 2.6        | 1.3, 5.0   | 2.6        | 1.8, 3.7   | 1.0                | 0.5, 1.7   | 0.9        | 0.4, 1.9   | 1.6        | 0.7, 3.4   | 0.8        | 0.2, 3.2   | 0.0              | NA         | 2.0        | 1.1, 3.7   | 0.6        | 0.2, 2.1   | 1.6        | 0.2, 10.3  |            |
|             |                     | CT        | 25.1               | 19.7, 31.6 | 27.4       | 24.4, 30.6 | 28.4       | 24.5, 32.8 | 26.4       | 24.2, 28.7 | 16.4               | 13.6, 19.7 | 18.4       | 15.5, 21.9 | 18.7       | 15.5, 22.4 | 17.2       | 12.2, 23.7 | 15.1             | 9.7, 22.7  | 17.8       | 15.4, 20.5 | 16.1       | 13.3, 19.2 | 16.8       | 11.7, 23.7 |            |
|             |                     | TT        | 73.2               | 66.6, 78.9 | 69.5       | 66.1, 72.6 | 69.0       | 65.0, 72.7 | 71.0       | 68.4, 73.5 | 82.6               | 79.1, 85.6 | 80.6       | 77.4, 83.6 | 79.7       | 75.9, 83.0 | 82.0       | 75.6, 87.0 | 84.9             | 77.3, 90.3 | 80.2       | 77.2, 82.9 | 83.3       | 79.8, 86.4 | 81.6       | 74.1, 87.3 |            |
| MBL2        | rs11003125          | CC        | 41.3               | 36.1, 46.7 | 42.3       | 38.4, 46.2 | 39.9       | 35.6, 44.4 | 39.5       | 35.4, 43.7 | 77.3               | 71.7, 82.0 | 76.7       | 72.9, 80.1 | 71.2       | 65.8, 76.0 | 82.1       | 79.1, 84.8 | 26.4             | 21.1, 32.4 | 23.0       | 19.8, 26.5 | 27.1       | 20.7, 34.7 | 27.9       | 23.2, 33.2 |            |
|             |                     | CG        | 43.6               | 37.7, 49.7 | 42.5       | 38.3, 46.9 | 49.6       | 44.0, 55.1 | 46.4       | 43.2, 49.6 | 21.1               | 16.9, 26.1 | 22.4       | 18.7, 26.6 | 25.4       | 21.2, 30.0 | 15.5       | 12.1, 19.6 | 47.3             | 41.8, 52.8 | 49.3       | 46.9, 51.8 | 45.8       | 39.0, 52.7 | 49.1       | 43.8, 54.4 |            |
|             |                     | GG        | 15.1               | 10.4, 21.5 | 15.2       | 11.1, 20.5 | 10.5       | 7.8, 14.0  | 14.1       | 12.1, 16.5 | 1.6                | 0.7, 3.5   | 0.9        | 0.3, 2.3   | 3.5        | 1.9, 6.3   | 2.4        | 1.1, 5.1   | 26.3             | 21.3, 32.0 | 27.7       | 24.5, 31.1 | 27.1       | 23.5, 31.1 | 23.0       | 17.4, 29.7 |            |
|             |                     | AA        | 3.9                | 1.9, 7.6   | 2.8        | 2.1, 3.9   | 1.8        | 1.1, 3.1   | 3.5        | 2.2, 5.8   | 0.7                | 0.2, 2.5   | 0.3        | 0.1, 0.9   | 0.4        | 0.1, 1.9   | 0.0        | NA         | 1.5              | 0.7, 3.3   | 1.9        | 0.9, 4.1   | 2.7        | 1.3, 5.4   | 2.5        | 1.5, 4.0   |            |
|             | rs1800450           | AG        | 23.5               | 17.1, 31.4 | 21.7       | 18.1, 25.7 | 26.6       | 22.2, 31.5 | 22.4       | 19.4, 25.8 | 11.0               | 7.7, 15.4  | 6.2        | 4.6, 8.2   | 6.6        | 4.4, 9.9   | 7.5        | 4.9, 11.4  | 23.7             | 17.9, 30.6 | 24.6       | 20.7, 28.9 | 26.5       | 21.8, 31.6 | 28.7       | 23.6, 34.4 |            |
|             |                     | GG        | 72.6               | 65.1, 79.0 | 75.5       | 71.3, 79.3 | 71.6       | 66.3, 76.3 | 74.0       | 71.3, 76.6 | 88.4               | 83.9, 91.7 | 93.5       | 91.5, 95.1 | 92.9       | 89.4, 95.3 | 92.5       | 88.6, 95.1 | 74.9             | 67.1, 81.3 | 73.5       | 68.9, 77.6 | 70.9       | 66.7, 74.7 | 68.9       | 63.2, 74.0 |            |
|             |                     | AA        | 0.0                | NA         | 0.1        | 0.0, 0.6   | 0.0        | NA         | 0.2        | 0.0, 1.1   | 5.6                | 3.6, 8.6   | 6.2        | 4.2, 8.9   | 6.8        | 4.4, 10.2  | 5.2        | 3.0, 9.0   | 0.0              | NA         | 0.0        | NA         | 0.0        | NA         | 0.0        | NA         |            |
|             |                     | AG        | 2.7                | 1.6, 4.7   | 4.5        | 3.3, 6.2   | 2.5        | 1.5, 4.1   | 4.8        | 3.9, 6.0   | 34.8               | 29.0, 41.2 | 34.1       | 29.5, 39.0 | 33.4       | 29.5, 37.5 | 36.8       | 30.2, 43.9 | 4.3              | 2.9, 6.2   | 4.7        | 3.0, 7.2   | 6.4        | 4.4, 9.2   | 6.0        | 4.0, 8.9   |            |
|             | rs5030737           | GG        | 97.3               | 95.3, 98.4 | 95.4       | 93.6, 96.7 | 97.5       | 95.9, 98.5 | 94.9       | 93.8, 95.9 | 59.6               | 53.0, 65.9 | 59.7       | 56.3, 63.1 | 59.9       | 56.0, 63.6 | 58.0       | 50.6, 65.0 | 95.7             | 93.8, 97.1 | 95.3       | 92.8, 97.0 | 93.6       | 90.8, 95.6 | 94.0       | 91.1, 96.0 |            |
|             |                     | CC        | 83.1               | 74.5, 89.2 | 84.4       | 80.3, 87.7 | 87.5       | 83.5, 90.7 | 88.0       | 84.8, 90.6 | 97.2               | 95.3, 98.3 | 97.7       | 95.9, 98.7 | 97.7       | 96.2, 98.6 | 98.7       | 95.6, 96.6 | 91.9             | 89.6, 93.8 | 95.1       | 92.9, 96.6 | 94.4       | 91.6, 96.4 | 95.8       | 92.4, 97.7 |            |
|             |                     | CT        | 15.7               | 10.1, 23.6 | 14.6       | 11.2, 18.8 | 12.2       | 9.2, 16.1  | 11.4       | 8.8, 14.7  | 2.8                | 1.7, 4.7   | 2.3        | 1.3, 4.1   | 2.3        | 1.4, 3.8   | 1.3        | 0.4, 4.4   | 7.7              | 6.1, 9.7   | 4.8        | 3.3, 6.9   | 5.6        | 3.6, 8.4   | 3.8        | 2.0, 7.1   |            |
|             |                     | TT        | 1.2                | 0.3, 4.9   | 1.1        | 0.5, 2.3   | 0.3        | 0.1, 1.1   | 0.6        | 0.3, 1.2   | 0.0                | NA         | 0.0        | NA         | 0.0        | NA         | 0.0        | NA         | 0.4              | 0.1, 1.9   | 0.1        | 0.0, 0.6   | 0.0        | NA         | 0.4        | 0.1, 2.4   |            |
|             | rs7096206           | CC        | 4.7                | 2.1, 10.0  | 5.7        | 4.3, 7.6   | 4.8        | 2.8, 8.1   | 5.2        | 3.4, 7.8   | 2.0                | 1.2, 3.3   | 1.9        | 1.1, 3.2   | 3.0        | 1.7, 5.3   | 2.2        | 0.9, 5.1   | 3.7              | 1.7, 8.2   | 1.9        | 1.1, 3.5   | 1.6        | 0.6, 4.2   | 2.0        | 0.9, 4.7   |            |
|             |                     | CG        | 34.7               | 28.3, 41.7 | 31.7       | 26.4, 37.5 | 37.8       | 32.4, 43.4 | 34.1       | 30.6, 37.9 | 26.1               | 21.6, 31.2 | 26.3       | 22.9, 30.1 | 24.7       | 21.7, 27.9 | 26.0       | 20.3, 32.7 | 18.0             | 13.6, 23.3 | 18.4       | 14.8, 22.6 | 16.2       | 12.2, 21.3 | 23.5       | 19.6, 27.8 |            |
|             |                     | GG        | 60.7               | 54.0, 67.0 | 62.6       | 56.8, 68.0 | 57.4       | 50.8, 63.8 | 60.7       | 57.3, 63.9 | 71.9               | 67.2, 76.2 | 71.8       | 67.5, 75.7 | 72.3       | 69.2, 75.2 | 71.8       | 65.2, 77.6 | 78.3             | 71.4, 83.9 | 79.7       | 75.2, 83.5 | 82.1       | 76.8, 86.5 | 74.5       | 70.1, 78.5 |            |
|             |                     | TT        | 0.0                | NA         | 0.0        | NA         | 0.0        | NA         | 0.0        | NA         | 0.0                | NA         | 0.0        | NA         | 0.0        | NA         | 0.0        | NA         | 0.0              | NA         | 0.0        | NA         | 0.0        | NA         | 0.0        | NA         |            |
| MTHFR       | rs1801131           | AA        | 52.8               | 46.2, 59.2 | 47.0       | 41.3, 52.8 | 48.0       | 43.0, 53.1 | 48.2       | 43.9, 52.4 | 68.9               | 62.9, 74.3 | 67.1       | 62.9, 71.1 | 67.0       | 61.5, 72.2 | 68.3       | 57.5, 77.5 | 70.6             | 62.5, 77.6 | 66.2       | 61.5, 70.5 | 62.1       | 51.4, 71.7 | 63.6       | 58.0, 68.8 |            |
|             |                     | AC        | 39.5               | 33.8, 45.5 | 43.8       | 39.1, 48.6 | 39.2       | 35.1, 43.4 | 40.8       | 35.9, 45.9 | 27.7               | 22.3, 33.8 | 29.1       | 25.5, 33.1 | 30.3       | 25.6, 35.5 | 28.1       | 19.9, 38.1 | 24.7             | 19.7, 30.4 | 30.7       | 27.0, 34.5 | 34.6       | 25.9, 44.5 | 33.0       | 26.8, 39.7 |            |
|             |                     | CC        | 7.7                | 4.5, 12.8  | 9.2        | 6.5, 12.8  | 12.8       | 9.7, 16.7  | 11.0       | 9.2, 13.1  | 3.4                | 1.8, 6.5   | 3.7        | 2.7, 5.1   | 2.6        | 1.3, 5.3   | 3.6        | 1.6, 7.6   | 4.8              | 2.1, 10.5  | 3.2        | 1.7, 5.7   | 3.3        | 1.6, 6.5   | 3.4        | 1.6, 7.2   |            |
|             |                     | CT        | 46.9               | 36.7, 57.3 | 47.7       | 41.8, 53.7 | 46.1       | 40.8, 51.4 | 44.2       | 40.7, 47.9 | 77.4               | 72.2, 81.8 | 77.7       | 75.3, 79.9 | 79.9       | 75.7, 83.6 | 76.0       | 69.6, 81.3 | 28.4             | 22.6, 35.0 | 31.1       | 28.1, 34.2 | 33.1       | 26.8, 39.9 | 28.2       | 23.9, 32.9 |            |
|             | rs1801133           | CC        | 41.0               | 32.2, 50.4 | 41.4       | 35.6, 47.3 | 41.8       | 36.7, 47.0 | 44.5       | 41.5, 47.2 | 21.1               | 17.1, 25.8 | 21.2       | 19.1, 23.5 | 19.3       | 15.8, 23.4 | 22.6       | 17.3, 29.0 | 47.0             | 37.9, 56.4 | 48.8       | 45.5, 52.3 | 51.6       | 47.2, 56.0 | 52.7       | 46.1, 59.1 |            |
|             |                     | CT        | 12.1               | 8.0, 18.0  | 10.9       | 8.3, 14.3  | 12.1       | 8.3, 17.4  | 11.3       | 8.8, 14.4  | 1.5                | 0.5, 4.3   | 1.1        | 0.5, 2.6   | 0.8        | 0.2, 3.2   | 1.4        | 0.5, 3.9   | 24.6             | 17.2, 33.8 | 20.1       | 17.7, 22.7 | 15.4       | 11.1, 20.8 | 19.2       | 14.7, 24.6 |            |
|             |                     | CC        | 84.7               | 77.8, 89.8 | 83.9       | 79.1, 87.8 | 80.9       | 77.5, 83.8 | 78.4       | 75.0, 81.5 | 82.8               | 76.6, 87.7 | 83.6       | 80.6, 86.1 | 84.5       | 79.6, 88.4 | 82.5       | 74.9, 88.2 | 89.6             | 84.4, 93.2 | 88.7       | 86.2, 90.8 | 83.6       | 78.2, 87.9 | 84.6       | 81.3, 87.4 |            |
|             |                     | CT        | 15.3               | 10.2, 22.2 | 15.2       | 11.6, 19.6 | 17.8       | 15.1, 20.9 | 19.9       | 16.6, 23.8 | 16.0               | 11.6, 21.8 | 16.0       | 13.4, 19.1 | 14.4       | 10.8, 18.9 | 15.9       | 10.8, 22.7 | 9.5              | 6.5, 13.8  | 11.0       | 8.9, 13.7  | 15.6       | 11.1, 21.5 | 15.4       | 12.6, 18.7 |            |
|             | TT                  | 0.0       | NA                 | 0.9        | 0.3, 2.7   | 1.3        | 0.7, 2.5   | 1.6        | 0.8, 3.2   | 1.1        | 0.3, 3.7           | 0.4        | 0.1, 1.1   | 1.2        | 0.4, 3.2   | 1.6        | 0.6, 4.2   | 0.9        | 0.2, 4.3         | 0.3        | 0.1, 1.2   | 0.8        | 0.2, 2.8   | 0.0        | NA         |            |            |
|             | MTRR                | rs1801394 | AA                 | 25.4       | 18.5, 33.8 | 20.1       | 15.9, 25.0 | 27.2       | 21.7, 33.6 | 19.4       | 16.4, 22.7         | 50.9       | 46.2, 55.5 | 47.2       | 42.8, 51.8 | 56.1       | 49.7, 62.3 | 51.5       | 47.6, 55.3       | 54.2       | 46.5, 61.7 | 55.8       | 50.9, 60.6 | 54.6       | 50.9, 58.4 | 52.8       | 48.1, 57.4 |
|             |                     |           | AG                 | 48.6       | 42.1, 55.1 | 52.9       | 47.8, 57.9 | 45.1       | 38.7, 51.7 | 48.2       | 44.6, 51.9         | 38.5       | 34.7, 42.4 | 44.7       | 40.8, 48.6 | 35.8       | 30.9, 41.0 | 43.3       | 39.5, 47.3       | 39.2       | 32.5, 46.4 | 37.6       | 32.2, 43.3 | 36.4       | 32.8, 40.1 | 40.7       | 36.1, 45.6 |
|             |                     |           | GG                 | 26.0       | 18.8, 34.8 | 27.0       | 24.0, 30.3 | 27.6       | 23.8, 31.9 | 32.4       | 29.4, 35.6         | 10.6       | 7.8, 14.4  | 8.1        | 6.1, 10.7  | 8.2        | 5.5, 11.9  | 5.2        | 2.8, 9.4         | 6.6        | 3.5, 12.1  | 6.6        | 5.0, 8.8   | 9.0        | 6.3, 12.6  | 6.5        | 3.8, 10.9  |
| NAT2        | rs1041983           | CC        | 37.4               | 29.6, 46.0 | 41.7       | 38.3, 45.2 | 41.5       | 36.7, 46.5 | 42.9       | 38.2, 47.8 | 30.6               | 24.8, 37.2 | 30.5       | 28.1, 32.9 | 31.1       | 25.8, 36.8 | 31.8       | 24.8, 39.8 | 50.6             | 42.2, 58.9 | 46.8       | 42.5, 51.2 | 44.9       | 39.2, 50.7 | 41.6       | 35.6, 47.8 |            |
|             |                     | CT        | 50.3               | 39.5, 61.2 | 45.7       | 42.4, 49.0 | 47.1       | 41.6, 52.6 | 44.2       | 39.1, 49.5 | 46.3               | 41.6, 51.1 | 46.3       | 43.1, 49.7 | 46.2       | 41.8, 50.7 | 45.3       | 38.6, 52.2 | 38.4             | 30.3, 47.2 | 42.6       | 38.8, 46.4 | 45.7       | 40.2, 51.3 | 47.2       | 40.6, 53.8 |            |
|             |                     | TT        | 12.2               | 7.7, 18.9  | 12.6       | 10.1, 15.6 | 11.4       | 8.2, 15.7  | 12.8       | 10.8, 15.2 | 23.1               | 18.0, 29.0 | 23.2       | 20.6, 26.0 | 22.7       | 18.3, 27.9 | 22.9       | 16.4, 30.9 | 11.0             | 6.9, 17.1  | 10.6       | 8.1, 13.7  | 9.4        | 6.7, 13.0  | 11.3       | 8.9, 14.2  |            |
|             |                     | AA        | 36.4               | 30.3, 43.0 | 33.5       | 28.6, 38.9 | 34.3       | 30.2, 38.7 | 35.4       | 33.5, 37.4 | 40.0               | 33.7, 46.6 | 40.0       | 36.7, 43.3 | 39.3       | 34.5, 44.2 | 36.1       | 29.2, 43.6 | 40.9             | 36.5, 45.6 | 39.7       | 34.7, 45.0 | 44.8       | 40.1, 49.5 | 42.1       | 36.8, 47.5 |            |
|             | rs1208              | AG        | 48.1               | 41.3, 54.8 | 49.9       | 44.9, 55.0 | 48.8       | 42.8, 54.9 | 47.5       | 44.6, 50.4 | 43.7               | 39.3, 48.2 | 43.4       | 39.6, 47.3 | 45.8       | 40.7, 51.0 | 49.7       | 41.8, 57.6 | 47.6             | 41.0, 54.3 | 47.0       | 42.5, 51.6 | 45.1       | 38.9, 51.4 | 40.5       | 35.0, 46.3 |            |
|             |                     | GG        | 15.5               | 12.3, 19.4 | 16.5       | 14.3, 19.0 | 16.9       | 13.2, 21.2 | 17.1       | 14.0, 20.7 | 16.3               | 12.0, 21.8 | 1          |            |            |            |            |            |                  |            |            |            |            |            |            |            |            |

| Gene symbol | Variant (dbSNP ID)*    | Genotype   | Non-Hispanic white |            |            |            |            |            |            |            | Non-Hispanic black |            |            |            |            |            |            |            | Mexican-American |            |            |            |            |            |            |            |
|-------------|------------------------|------------|--------------------|------------|------------|------------|------------|------------|------------|------------|--------------------|------------|------------|------------|------------|------------|------------|------------|------------------|------------|------------|------------|------------|------------|------------|------------|
|             |                        |            | Age (years)        |            |            |            |            |            |            |            | Age (years)        |            |            |            |            |            |            |            | Age (years)      |            |            |            |            |            |            |            |
|             |                        |            | 12-19              |            | 20-39      |            | 40-59      |            | ≥ 60       |            | 12-19              |            | 20-39      |            | 40-59      |            | ≥ 60       |            | 12-19            |            | 20-39      |            | 40-59      |            | ≥ 60       |            |
|             |                        |            | %                  | 95% CI     | %          | 95% CI     | %          | 95% CI     | %          | 95% CI     | %                  | 95% CI     | %          | 95% CI     | %          | 95% CI     | %          | 95% CI     | %                | 95% CI     | %          | 95% CI     | %          | 95% CI     | %          | 95% CI     |
| NOS3        | rs1799983              | GG         | 46.1               | 38.5, 53.9 | 43.4       | 39.4, 47.5 | 48.6       | 44.0, 53.2 | 44.9       | 41.6, 48.1 | 74.1               | 70.0, 77.8 | 74.4       | 69.8, 78.6 | 77.0       | 71.6, 81.6 | 73.5       | 69.1, 77.4 | 65.4             | 61.0, 69.6 | 65.7       | 59.8, 71.0 | 65.8       | 60.0, 71.1 | 57.8       | 50.7, 64.6 |
|             |                        | GT         | 43.4               | 35.3, 51.8 | 44.3       | 40.0, 48.6 | 42.3       | 36.9, 47.8 | 45.8       | 41.9, 49.7 | 25.0               | 21.3, 29.2 | 24.3       | 20.2, 29.0 | 22.8       | 18.1, 28.2 | 24.2       | 19.6, 29.5 | 29.4             | 24.7, 34.6 | 30.9       | 26.0, 36.3 | 29.9       | 24.7, 35.8 | 36.3       | 28.7, 44.6 |
|             |                        | TT         | 10.5               | 6.8, 16.1  | 12.4       | 9.6, 15.7  | 9.2        | 7.1, 11.7  | 9.3        | 7.6, 11.4  | 0.9                | 0.4, 2.1   | 1.3        | 0.6, 2.7   | 0.3        | 0.0, 1.9   | 2.3        | 0.9, 6.0   | 5.2              | 3.1, 8.8   | 3.4        | 2.4, 5.0   | 4.3        | 2.5, 7.3   | 5.9        | 3.9, 8.9   |
|             | rs2070744              | CC         | 14.3               | 10.3, 19.6 | 16.2       | 13.0, 20.1 | 14.2       | 11.1, 18.1 | 15.7       | 12.9, 18.9 | 1.6                | 0.8, 3.1   | 1.8        | 1.0, 3.2   | 0.9        | 0.3, 2.4   | 2.1        | 1.2, 3.4   | 8.9              | 5.3, 14.6  | 6.6        | 5.3, 8.3   | 5.8        | 4.0, 8.3   | 11.1       | 8.8, 13.9  |
|             |                        | CT         | 44.1               | 39.4, 49.0 | 49.2       | 45.5, 52.9 | 47.5       | 43.9, 51.1 | 47.0       | 44.0, 50.0 | 22.9               | 19.2, 27.1 | 27.9       | 24.7, 31.4 | 29.4       | 24.4, 35.0 | 26.5       | 20.5, 33.6 | 37.3             | 30.4, 44.7 | 35.2       | 31.6, 39.0 | 35.6       | 29.9, 41.6 | 35.1       | 30.0, 40.6 |
|             |                        | TT         | 41.5               | 36.1, 47.2 | 34.6       | 31.2, 38.1 | 38.3       | 32.8, 44.1 | 37.3       | 34.3, 40.4 | 75.5               | 71.0, 79.6 | 70.3       | 66.9, 73.4 | 69.7       | 63.6, 75.2 | 71.4       | 64.2, 77.7 | 53.8             | 46.7, 60.8 | 58.1       | 54.4, 61.7 | 58.7       | 53.0, 64.1 | 53.8       | 47.6, 59.9 |
|             |                        |            |                    |            |            |            |            |            |            |            |                    |            |            |            |            |            |            |            |                  |            |            |            |            |            |            |            |
| NQO1        | rs10517                | CC         | 74.5               | 68.6, 79.5 | 74.8       | 70.0, 79.1 | 76.0       | 72.1, 79.6 | 76.4       | 73.4, 79.1 | 73.9               | 68.6, 78.5 | 74.1       | 70.4, 77.5 | 73.9       | 69.7, 77.7 | 73.7       | 66.5, 79.7 | 89.5             | 82.3, 94.0 | 87.7       | 84.7, 90.1 | 84.5       | 79.4, 88.4 | 85.9       | 82.0, 89.1 |
|             |                        | CT         | 23.0               | 18.6, 28.1 | 23.8       | 19.7, 28.5 | 22.0       | 18.9, 25.4 | 22.0       | 19.2, 24.9 | 24.0               | 19.3, 29.4 | 24.2       | 20.8, 28.0 | 25.3       | 21.7, 29.3 | 23.6       | 17.6, 30.8 | 9.9              | 5.6, 16.8  | 12.3       | 9.9, 15.3  | 15.4       | 11.4, 20.5 | 13.2       | 10.3, 16.8 |
|             |                        | TT         | 2.6                | 1.3, 5.0   | 1.4        | 0.9, 2.1   | 2.0        | 0.9, 4.4   | 1.7        | 0.9, 3.1   | 2.1                | 0.8, 5.6   | 1.7        | 0.8, 3.6   | 0.8        | 0.3, 2.1   | 2.8        | 1.4, 5.2   | 0.6              | 0.1, 2.6   | 0.0        | NA         | 0.1        | 0.0, 1.0   | 0.8        | 0.2, 3.4   |
|             | rs1800566              | CC         | 60.2               | 52.4, 67.5 | 64.6       | 59.6, 69.3 | 66.8       | 60.8, 72.3 | 64.5       | 60.0, 68.7 | 67.8               | 63.6, 71.8 | 63.1       | 59.7, 66.3 | 68.1       | 62.2, 73.4 | 67.6       | 62.6, 72.3 | 39.4             | 32.9, 46.3 | 42.4       | 39.3, 45.6 | 36.2       | 31.6, 41.1 | 41.5       | 35.7, 47.6 |
|             |                        | CT         | 35.7               | 28.9, 43.2 | 32.5       | 28.1, 37.2 | 29.1       | 23.8, 35.0 | 32.2       | 28.5, 36.2 | 29.2               | 24.6, 34.3 | 32.7       | 29.2, 36.4 | 29.5       | 24.4, 35.1 | 28.5       | 24.1, 33.3 | 42.3             | 35.5, 49.4 | 44.3       | 41.5, 47.2 | 51.4       | 45.4, 57.2 | 46.4       | 40.5, 52.4 |
|             |                        | TT         | 4.1                | 2.1, 7.6   | 2.9        | 2.2, 3.9   | 4.1        | 2.7, 6.1   | 3.3        | 2.4, 4.6   | 2.9                | 1.5, 5.6   | 4.2        | 3.0, 6.0   | 2.5        | 1.4, 4.4   | 3.9        | 2.1, 7.0   | 18.3             | 14.4, 22.9 | 13.3       | 11.5, 15.3 | 12.4       | 9.3, 16.5  | 12.1       | 9.2, 15.9  |
|             | rs34755915             | AA         | 0.0                | NA         | 0.0        | NA         | 0.0        | NA         | 0.2        | 0.0, 1.8   | 0.0                | NA         | 0.0        | NA         | 0.0        | NA         | 0.0        | NA         | 0.0              | NA         | 0.0        | NA         | 0.0        | NA         | 0.0        | NA         |
|             |                        | AG         | 4.0                | 1.9, 8.4   | 3.7        | 2.4, 5.6   | 3.4        | 2.2, 5.3   | 3.2        | 2.3, 4.5   | 0.2                | 0.0, 1.4   | 1.2        | 0.4, 3.3   | 0.7        | 0.2, 2.0   | 0.6        | 0.2, 2.7   | 1.0              | 0.2, 4.3   | 1.2        | 0.6, 2.3   | 1.0        | 0.3, 3.2   | 0.9        | 0.3, 2.7   |
|             |                        |            |                    |            |            |            |            |            |            |            |                    |            |            |            |            |            |            |            |                  |            |            |            |            |            |            |            |
|             | rs689452               | GG         | 96.0               | 91.6, 98.1 | 96.3       | 94.4, 97.6 | 96.6       | 94.7, 97.8 | 96.6       | 95.0, 97.7 | 99.8               | 100.0      | 98.8       | 96.7, 99.6 | 99.3       | 98.0, 99.8 | 99.4       | 97.3, 99.8 | 99.0             | 95.7, 99.8 | 98.8       | 97.7, 99.4 | 99.0       | 96.8, 99.7 | 99.1       | 97.3, 99.7 |
|             |                        | CC         | 76.6               | 71.3, 81.2 | 77.0       | 72.4, 80.9 | 78.1       | 74.5, 81.4 | 78.2       | 75.0, 81.1 | 73.6               | 68.3, 78.2 | 74.2       | 70.8, 77.3 | 74.7       | 70.3, 78.6 | 74.4       | 67.0, 80.5 | 89.9             | 82.9, 94.2 | 87.8       | 84.4, 90.6 | 85.0       | 80.1, 88.9 | 86.4       | 81.7, 90.1 |
|             |                        | CG         | 21.3               | 17.2, 26.1 | 22.1       | 18.3, 26.3 | 20.3       | 17.3, 23.7 | 20.5       | 17.7, 23.7 | 24.3               | 19.6, 29.7 | 24.2       | 20.9, 27.8 | 24.5       | 20.7, 28.6 | 22.9       | 16.9, 30.2 | 9.5              | 5.4, 16.1  | 12.2       | 9.4, 15.6  | 14.9       | 11.0, 19.8 | 12.7       | 9.3, 17.1  |
|             |                        | GG         | 2.0                | 0.9, 4.5   | 1.0        | 0.5, 1.8   | 1.6        | 0.6, 4.1   | 1.2        | 0.7, 2.3   | 2.1                | 0.8, 5.7   | 1.6        | 0.8, 3.5   | 0.8        | 0.3, 2.1   | 2.8        | 1.4, 5.2   | 0.6              | 0.1, 2.6   | 0.0        | NA         | 0.1        | 0.0, 1.0   | 0.8        | 0.2, 3.4   |
| AA          |                        | 1.1        | 0.3, 3.8           | 0.4        | 0.1, 1.3   | 0.3        | 0.1, 1.5   | 0.7        | 0.3, 1.6   | 0.3        | 0.1, 1.1           | 0.2        | 0.0, 0.7   | 0.5        | 0.1, 3.6   | 0.8        | 0.2, 3.4   | 0.0        | NA               | 0.7        | 0.3, 1.8   | 0.8        | 0.2, 3.1   | 0.6        | 0.1, 3.8   |            |
| AG          |                        | 14.9       | 9.3, 23.0          | 13.1       | 10.5, 16.2 | 16.5       | 13.8, 19.8 | 15.0       | 12.0, 18.5 | 10.4       | 7.6, 14.0          | 8.2        | 6.3, 10.8  | 9.7        | 6.6, 14.1  | 11.5       | 7.5, 17.1  | 10.1       | 5.4, 18.0        | 9.5        | 7.1, 12.6  | 9.5        | 6.6, 13.6  | 5.0        | 3.2, 7.8   |            |
| rs689453    | GG                     | 84.0       | 75.8, 89.8         | 86.5       | 83.5, 89.1 | 83.2       | 79.8, 86.1 | 84.3       | 80.9, 87.2 | 89.3       | 85.8, 92.1         | 91.6       | 89.1, 93.6 | 89.8       | 85.7, 92.9 | 87.7       | 82.5, 91.5 | 89.9       | 82.0, 94.6       | 89.8       | 86.3, 92.5 | 89.7       | 85.7, 92.6 | 94.4       | 92.7, 95.7 |            |
| OGGI        | rs1052133              | CC         | 60.9               | 54.1, 67.4 | 62.1       | 56.4, 67.5 | 62.0       | 56.2, 67.5 | 59.3       | 54.7, 63.7 | 70.8               | 65.8, 75.4 | 67.4       | 62.9, 71.6 | 74.8       | 70.9, 78.3 | 65.1       | 59.9, 70.1 | 47.7             | 40.5, 54.9 | 44.3       | 39.6, 49.0 | 40.7       | 36.1, 45.5 | 45.4       | 39.6, 51.4 |
|             |                        | CG         | 35.8               | 30.2, 41.7 | 33.9       | 29.3, 38.8 | 33.0       | 27.7, 38.8 | 36.4       | 32.3, 40.6 | 27.2               | 22.2, 32.8 | 30.0       | 25.8, 34.6 | 22.3       | 18.9, 26.2 | 33.0       | 28.3, 38.1 | 44.7             | 39.5, 50.0 | 44.4       | 39.9, 49.0 | 49.4       | 45.5, 53.2 | 44.0       | 37.9, 50.3 |
|             |                        | GG         | 3.3                | 1.5, 7.0   | 4.0        | 2.7, 5.8   | 4.9        | 2.7, 8.7   | 4.3        | 2.9, 6.3   | 2.0                | 0.8, 4.6   | 2.6        | 1.5, 4.5   | 2.9        | 1.3, 6.5   | 1.9        | 1.1, 3.2   | 7.7              | 4.9, 11.9  | 11.4       | 9.6, 13.4  | 9.9        | 6.4, 14.9  | 10.5       | 7.9, 13.9  |
| PONI        | rs662*                 | AA         | 51.8               | 44.1, 59.4 | 45.5       | 41.5, 49.6 | 46.8       | 41.8, 51.9 | 48.6       | 44.0, 53.2 | 12.6               | 9.7, 16.2  | 11.0       | 8.3, 14.4  | 11.7       | 8.7, 15.7  | 9.6        | 5.9, 15.3  | 25.7             | 20.0, 32.3 | 27.9       | 23.5, 32.8 | 32.8       | 27.7, 38.4 | 29.4       | 24.3, 35.1 |
|             |                        | AG         | 41.6               | 33.8, 49.8 | 44.4       | 39.9, 48.9 | 40.4       | 35.5, 45.5 | 42.1       | 37.6, 46.8 | 43.6               | 38.7, 48.7 | 42.7       | 40.0, 45.5 | 43.7       | 38.8, 48.6 | 43.2       | 36.9, 49.7 | 56.8             | 50.1, 63.2 | 49.5       | 44.5, 54.6 | 45.3       | 39.9, 50.8 | 44.1       | 36.8, 51.7 |
|             |                        | GG         | 6.7                | 4.0, 10.8  | 10.1       | 8.1, 12.4  | 12.7       | 9.8, 16.5  | 9.3        | 7.1, 12.1  | 43.8               | 39.4, 48.3 | 46.3       | 44.2, 48.4 | 44.6       | 39.5, 49.9 | 47.2       | 41.8, 52.7 | 17.6             | 13.8, 22.1 | 22.6       | 20.5, 24.8 | 21.9       | 16.9, 27.8 | 26.5       | 21.2, 32.5 |
|             | rs854560*              | AA         | 13.9               | 9.1, 20.6  | 13.5       | 10.3, 17.6 | 13.1       | 10.3, 16.5 | 13.7       | 11.7, 16.1 | 2.9                | 1.8, 4.5   | 3.1        | 2.0, 4.8   | 2.6        | 1.3, 5.2   | 2.9        | 1.6, 5.2   | 5.6              | 3.3, 9.3   | 4.3        | 2.9, 6.3   | 5.4        | 3.4, 8.4   | 6.8        | 3.6, 12.2  |
|             |                        | AT         | 49.7               | 43.0, 56.5 | 42.3       | 37.3, 47.4 | 44.0       | 38.4, 49.7 | 45.0       | 41.6, 48.5 | 28.9               | 23.7, 34.6 | 29.8       | 27.0, 32.8 | 30.9       | 25.4, 37.0 | 30.4       | 25.7, 35.5 | 38.7             | 34.0, 43.5 | 34.1       | 30.1, 38.3 | 38.9       | 33.2, 44.9 | 35.2       | 30.2, 40.4 |
| TT          | 36.4                   | 29.3, 44.1 | 44.2               | 37.9, 50.6 | 42.9       | 37.2, 48.9 | 41.3       | 38.5, 44.1 | 68.3       | 62.6, 73.4 | 67.1               | 64.1, 70.0 | 66.5       | 60.5, 72.0 | 66.7       | 62.2, 70.9 | 55.7       | 50.4, 60.9 | 61.6             | 57.0, 66.0 | 55.8       | 48.6, 62.7 | 58.1       | 54.2, 61.8 |            |            |
| PPARG       | rs1801282              | CC         | 74.5               | 67.2, 80.6 | 76.1       | 72.5, 79.4 | 74.7       | 70.4, 78.7 | 77.4       | 74.7, 79.8 | 95.4               | 91.1, 97.6 | 94.9       | 93.4, 96.1 | 94.5       | 91.3, 96.5 | 95.9       | 91.9, 98.0 | 77.9             | 73.0, 82.1 | 75.6       | 72.6, 78.3 | 76.9       | 73.8, 79.8 | 79.6       | 73.1, 84.8 |
|             |                        | CG         | 24.2               | 18.6, 30.7 | 20.4       | 17.3, 24.0 | 23.4       | 19.2, 28.2 | 21.6       | 19.1, 24.5 | 4.6                | 2.4, 8.9   | 5.0        | 3.8, 6.5   | 5.5        | 3.5, 8.7   | 4.1        | 2.0, 8.1   | 20.0             | 16.1, 24.6 | 22.8       | 20.2, 25.5 | 22.5       | 19.6, 25.7 | 19.2       | 14.3, 25.4 |
|             |                        | GG         | 1.4                | 0.3, 5.6   | 3.5        | 2.4, 5.0   | 1.9        | 0.7, 4.5   | 1.0        | 0.5, 2.1   | 0.0                | NA         | 0.1        | 0.0, 0.9   | 0.0        | NA         | 0.0        | NA         | 2.1              | 0.7, 6.2   | 1.7        | 1.1, 2.6   | 0.6        | 0.2, 1.9   | 1.2        | 0.2, 7.0   |
| SERPINE1    | rs1799762 <sup>†</sup> | 4G/4G      | 24.8               | 19.9, 30.5 | 27.0       | 23.7, 30.5 | 29.7       | 26.6, 33.0 | 27.7       | 24.7, 30.9 | 5.6                | 3.5, 9.1   | 7.2        | 4.7, 10.8  | 7.1        | 4.8, 10.4  | 5.1        | 2.5, 10.2  | 14.0             | 9.3, 20.6  | 10.0       | 7.8, 12.8  | 13.3       | 7.5, 22.4  | 14.4       | 11.0, 18.7 |
|             |                        | 4G/5G      | 50.4               | 44.1, 56.6 | 51.5       | 47.4, 55.6 | 48.0       | 44.9, 51.0 | 48.7       | 45.1, 52.4 | 40.3               | 37.7, 43.0 | 39.1       | 36.1, 42.2 | 41.1       | 35.1, 47.3 | 41.2       | 34.3, 48.5 | 45.3             | 40.2, 50.6 | 43.1       | 38.3, 48.2 | 45.4       | 38.4, 52.6 | 44.9       | 41.0, 48.8 |
|             |                        | 5G/5G      | 24.8               | 20.0, 30.4 | 21.5       | 18.0, 25.5 | 22.3       | 19.1, 25.9 | 23.5       | 21.1, 26.2 | 54.0               | 50.5, 57.5 | 53.7       | 49.3, 58.0 | 51.8       | 46.1, 57.6 | 53.7       | 47.7, 59.6 | 40.6             | 32.5, 49.3 | 46.8       | 42.4, 51.3 | 41.3       | 35.4, 47.6 | 40.7       | 36.1, 45.4 |
| TGFB1       | rs1982073              | CC         | 17.6               | 11.2, 26.6 | 14.6       | 11.5, 18.3 |            |            |            |            |                    |            |            |            |            |            |            |            |                  |            |            |            |            |            |            |            |

| Gene symbol | Variant (dbSNP ID) <sup>a</sup> | Genotype | Non-Hispanic white |            |            |            |            |            |            |            |            | Non-Hispanic black |            |            |            |            |            | Mexican-American |            |            |            |            |            |            |            |            |
|-------------|---------------------------------|----------|--------------------|------------|------------|------------|------------|------------|------------|------------|------------|--------------------|------------|------------|------------|------------|------------|------------------|------------|------------|------------|------------|------------|------------|------------|------------|
|             |                                 |          | Age (years)        |            |            |            |            |            |            |            |            | Age (years)        |            |            |            |            |            | Age (years)      |            |            |            |            |            |            |            |            |
|             |                                 |          | 12-19              |            |            | 20-39      |            |            | 40-59      |            |            | ≥ 60               |            |            | 12-19      |            |            | 20-39            |            |            | 40-59      |            |            | ≥ 60       |            |            |
|             |                                 |          | %                  | 95% CI     |            | %          | 95% CI     |            | %          | 95% CI     |            | %                  | 95% CI     |            | %          | 95% CI     |            | %                | 95% CI     |            | %          | 95% CI     |            | %          | 95% CI     |            |
| VDR         | rs2239185                       | CC       | 24.7               | 16.2, 35.7 | 26.8       | 23.0, 31.0 | 25.6       | 21.0, 30.8 | 23.6       | 19.9, 27.8 | 16.7       | 13.3, 20.7         | 18.3       | 15.0, 22.1 | 16.2       | 13.5, 19.4 | 23.6       | 18.7, 29.2       | 33.3       | 25.6, 42.1 | 32.6       | 29.3, 36.1 | 38.6       | 32.2, 45.4 | 33.7       | 26.6, 41.6 |
|             |                                 | CT       | 41.7               | 35.2, 48.6 | 46.4       | 41.7, 51.0 | 43.4       | 37.8, 49.2 | 45.3       | 41.9, 48.8 | 49.0       | 44.8, 53.1         | 50.2       | 46.2, 54.2 | 49.5       | 42.8, 56.3 | 47.3       | 40.3, 54.4       | 47.1       | 40.9, 53.3 | 50.5       | 46.4, 54.6 | 44.1       | 38.3, 50.1 | 47.2       | 40.2, 54.3 |
|             |                                 | TT       | 33.6               | 25.2, 43.1 | 26.8       | 23.8, 30.1 | 31.0       | 26.8, 35.5 | 31.1       | 27.7, 34.7 | 34.4       | 29.6, 39.4         | 31.5       | 28.4, 34.8 | 34.2       | 28.7, 40.2 | 29.1       | 23.9, 35.0       | 19.6       | 15.3, 24.8 | 16.9       | 14.4, 19.7 | 17.3       | 11.9, 24.5 | 19.1       | 12.8, 27.5 |
|             | rs731236                        | CC       | 16.7               | 11.5, 23.6 | 14.3       | 12.3, 16.6 | 16.8       | 13.9, 20.2 | 15.4       | 12.2, 19.2 | 4.4        | 2.4, 7.8           | 7.8        | 6.4, 9.4   | 8.1        | 6.3, 10.5  | 7.8        | 5.6, 10.6        | 5.2        | 3.3, 8.1   | 4.7        | 3.3, 6.6   | 4.4        | 2.3, 8.3   | 7.1        | 4.2, 11.7  |
|             |                                 | CT       | 43.1               | 35.8, 50.7 | 44.5       | 40.3, 48.9 | 44.9       | 39.8, 50.0 | 47.2       | 43.4, 51.1 | 43.0       | 40.0, 46.0         | 41.6       | 38.6, 44.6 | 43.1       | 37.7, 48.7 | 39.3       | 33.8, 45.2       | 36.7       | 32.6, 41.1 | 38.9       | 35.4, 42.4 | 37.4       | 32.4, 42.6 | 34.5       | 29.6, 39.6 |
|             |                                 | TT       | 40.2               | 29.8, 51.6 | 41.1       | 37.3, 45.1 | 38.3       | 34.1, 42.7 | 37.3       | 33.6, 41.2 | 52.7       | 48.6, 56.7         | 50.6       | 47.2, 54.1 | 48.7       | 43.2, 54.3 | 52.9       | 47.0, 58.7       | 58.1       | 53.1, 63.0 | 56.5       | 51.9, 60.9 | 58.2       | 52.7, 63.5 | 58.4       | 52.0, 64.6 |
| XRCC1       | rs1001581                       | AA       | 12.0               | 7.4, 18.9  | 16.1       | 13.0, 19.7 | 16.1       | 13.6, 19.1 | 14.9       | 12.3, 18.0 | 14.5       | 11.7, 17.8         | 13.4       | 11.3, 15.8 | 14.6       | 11.5, 18.3 | 18.4       | 13.6, 24.5       | 8.7        | 5.9, 12.8  | 8.4        | 6.5, 10.7  | 10.9       | 8.5, 13.9  | 10.3       | 7.8, 13.5  |
|             |                                 | AG       | 45.7               | 38.9, 52.7 | 51.7       | 46.8, 56.5 | 48.2       | 43.1, 53.4 | 48.1       | 42.6, 53.6 | 44.2       | 38.7, 49.7         | 43.9       | 40.5, 47.3 | 42.9       | 38.0, 47.9 | 47.5       | 42.1, 53.0       | 45.3       | 36.8, 54.1 | 41.9       | 37.3, 46.7 | 39.4       | 33.2, 45.9 | 42.1       | 34.9, 49.8 |
|             |                                 | GG       | 42.3               | 31.7, 53.6 | 32.2       | 28.2, 36.6 | 35.6       | 30.4, 41.2 | 37.0       | 33.5, 40.6 | 41.3       | 36.2, 46.6         | 42.8       | 38.1, 47.5 | 42.5       | 37.9, 47.3 | 34.1       | 28.1, 40.5       | 45.9       | 37.3, 54.8 | 49.7       | 44.9, 54.5 | 49.7       | 43.1, 56.4 | 47.6       | 40.5, 54.8 |
|             | rs1799782                       | CC       | 88.6               | 82.2, 92.9 | 92.1       | 90.7, 93.4 | 90.5       | 86.1, 93.7 | 88.2       | 85.4, 90.5 | 89.4       | 87.0, 91.4         | 87.5       | 84.9, 89.7 | 86.0       | 82.5, 88.9 | 92.4       | 89.3, 94.7       | 75.5       | 68.9, 81.2 | 72.8       | 69.2, 76.1 | 72.3       | 68.7, 75.7 | 69.8       | 61.0, 77.4 |
|             |                                 | CT       | 11.1               | 6.7, 17.9  | 7.6        | 6.4, 9.1   | 9.1        | 6.2, 13.1  | 11.5       | 9.2, 14.2  | 9.7        | 7.8, 12.0          | 12.3       | 10.2, 14.7 | 13.2       | 10.4, 16.6 | 6.8        | 4.7, 9.7         | 22.5       | 17.3, 28.8 | 24.3       | 22.0, 26.9 | 26.0       | 22.7, 29.7 | 25.2       | 18.7, 33.2 |
|             |                                 | TT       | 0.3                | 0.0, 1.9   | 0.3        | 0.1, 0.8   | 0.4        | 0.0, 2.9   | 0.3        | 0.1, 1.2   | 0.9        | 0.2, 3.4           | 0.2        | 0.0, 1.1   | 0.7        | 0.2, 3.5   | 0.8        | 0.4, 1.6         | 1.9        | 0.7, 5.5   | 2.9        | 1.7, 4.9   | 1.6        | 1.0, 2.5   | 4.9        | 2.4, 9.8   |
|             | rs25486                         | AA       | 46.5               | 36.7, 56.5 | 37.5       | 33.0, 42.2 | 41.5       | 36.6, 46.6 | 41.3       | 38.3, 44.3 | 60.0       | 56.3, 63.6         | 60.1       | 55.6, 64.5 | 54.1       | 50.1, 58.1 | 55.0       | 49.9, 60.0       | 54.5       | 47.8, 61.0 | 55.8       | 52.1, 59.4 | 55.8       | 49.3, 62.1 | 53.6       | 45.9, 61.1 |
|             |                                 | AG       | 42.4               | 36.9, 48.2 | 50.0       | 44.8, 55.2 | 44.8       | 39.6, 50.1 | 46.8       | 42.8, 50.9 | 32.2       | 28.9, 35.6         | 34.8       | 31.1, 38.7 | 38.6       | 33.3, 44.2 | 39.7       | 35.6, 44.0       | 39.7       | 34.5, 45.0 | 37.9       | 34.4, 41.5 | 35.4       | 29.4, 41.9 | 39.2       | 31.4, 47.5 |
|             |                                 | GG       | 11.1               | 6.3, 18.7  | 12.5       | 9.7, 16.0  | 13.7       | 10.9, 17.0 | 11.9       | 9.7, 14.4  | 7.8        | 5.6, 10.8          | 5.1        | 4.1, 6.4   | 7.3        | 4.2, 12.3  | 5.3        | 3.4, 8.3         | 5.9        | 3.8, 9.1   | 6.4        | 4.9, 8.2   | 8.8        | 7.6, 10.2  | 7.2        | 4.6, 11.1  |
|             | rs25487                         | AA       | 10.7               | 6.1, 18.0  | 12.3       | 9.3, 15.9  | 14.4       | 11.7, 17.5 | 12.2       | 9.7, 15.1  | 4.1        | 2.4, 6.8           | 2.5        | 1.6, 3.8   | 2.5        | 1.4, 4.4   | 2.8        | 1.2, 6.4         | 6.0        | 3.8, 9.3   | 6.3        | 4.9, 8.2   | 7.9        | 6.4, 9.8   | 8.3        | 5.5, 12.2  |
|             |                                 | AG       | 42.8               | 37.0, 48.8 | 49.9       | 44.4, 55.4 | 44.7       | 39.4, 50.1 | 46.9       | 42.4, 51.5 | 25.1       | 20.5, 30.3         | 24.0       | 21.1, 27.2 | 29.1       | 24.9, 33.6 | 28.8       | 24.4, 33.6       | 39.9       | 35.5, 44.5 | 37.7       | 34.0, 41.6 | 35.7       | 29.7, 42.1 | 37.6       | 30.0, 45.8 |
|             |                                 | GG       | 46.5               | 36.4, 57.0 | 37.9       | 33.3, 42.6 | 40.9       | 36.1, 45.9 | 40.9       | 38.0, 43.9 | 70.8       | 65.8, 75.4         | 73.5       | 69.9, 76.8 | 68.4       | 64.0, 72.5 | 68.5       | 62.5, 73.8       | 54.1       | 47.8, 60.3 | 56.0       | 52.3, 59.5 | 56.4       | 50.0, 62.6 | 54.2       | 46.9, 61.3 |
| rs25489*    | AA                              | 0.0      | NA                 | 0.0        | NA         | 0.1        | 0.0, 0.5   | 0.4        | 0.1, 1.2   | 0.0        | NA         | 0.4                | 0.1, 1.6   | 0.2        | 0.0, 2.0   | 0.1        | 0.0, 1.0   | 0.5              | 0.1, 2.4   | 2.2        | 1.6, 3.0   | 1.3        | 0.7, 2.3   | 2.3        | 1.1, 4.6   |            |
|             | AG                              | 7.8      | 5.0, 12.0          | 8.3        | 6.1, 11.1  | 7.5        | 5.0, 11.2  | 7.1        | 5.2, 9.8   | 7.6        | 5.0, 11.6  | 6.1                | 4.7, 7.9   | 4.9        | 3.5, 6.9   | 9.0        | 5.5, 14.5  | 24.8             | 18.2, 32.8 | 22.2       | 19.4, 25.1 | 18.3       | 14.8, 22.3 | 18.7       | 15.2, 22.9 |            |
|             | GG                              | 92.2     | 88.0, 95.0         | 91.7       | 88.9, 93.9 | 92.4       | 88.7, 95.0 | 92.5       | 90.1, 94.3 | 92.4       | 88.4, 95.0 | 93.5               | 91.9, 94.9 | 94.8       | 92.7, 96.3 | 90.9       | 85.6, 94.4 | 74.7             | 66.7, 81.4 | 75.7       | 72.1, 78.9 | 80.4       | 76.2, 84.0 | 79.0       | 74.8, 82.7 |            |

CI, confidence interval; NA, not applicable.

\*  $P < 0.05$  after adjustment for race/ethnicity.

<sup>a</sup> Unique identifier in the Entrez SNP (single-nucleotide polymorphism) database at the National Center for Biotechnology Information (<http://www.ncbi.nlm.nih.gov/projects/SNP/>).

<sup>b</sup> Variant also known as rs1799768 and rs1799889.
