# Supplementary material for: Prevalence in the United States of Selected Candidate Gene Variants: Third National Health and Nutrition Examination Survey, 1991–1994
Source: PubMed Central journal article supplement — Am J Epidemiol. 2008 Oct 20;169(1):54–66. doi: 10.1093/aje/kwn286 (PMC2638878; doi:10.1093/aje/kwn286), 2008-10-20
Supplement: kwn286_5.pdf [file kwn286_5.pdf]

**Appendix 7. Weighted Allele Frequencies in the US Population, by Race/Ethnicity and by Sex, Third National Health and Nutrition Examination Survey (NHANES III), Phase 2 (1991–1994)**

| Gene symbol   | Variant (dbSNP ID) <sup>a</sup> | Allele <sup>b</sup> | Non-Hispanic white |            |        |            | Non-Hispanic black |            |        |            | Mexican-American |            |        |            |
|---------------|---------------------------------|---------------------|--------------------|------------|--------|------------|--------------------|------------|--------|------------|------------------|------------|--------|------------|
|               |                                 |                     | Male               |            | Female |            | Male               |            | Female |            | Male             |            | Female |            |
|               |                                 |                     | %                  | 95% CI     | %      | 95% CI     | %                  | 95% CI     | %      | 95% CI     | %                | 95% CI     | %      | 95% CI     |
| <i>ABCB1</i>  | rs1045642                       | T (C)               | 50.1               | 47.9, 52.3 | 46.8   | 44.1, 49.5 | 78.7               | 77.0, 80.3 | 79.4   | 77.5, 81.1 | 55.0             | 52.4, 57.5 | 55.6   | 51.7, 59.4 |
| <i>ACE</i>    | rs4646994                       | Ins (Del)           | 45.9               | 43.2, 48.6 | 45.0   | 42.7, 47.4 | 40.5               | 37.8, 43.2 | 42.0   | 39.7, 44.3 | 53.9             | 50.5, 57.3 | 52.8   | 49.9, 55.6 |
| <i>ADH1B</i>  | rs1229984                       | A (G)               | 5.3                | 4.2, 6.6   | 4.1    | 3.0, 5.6   | 1.6                | 0.8, 3.4   | 1.1    | 0.7, 1.8   | 5.0              | 4.3, 5.7   | 6.0    | 4.9, 7.2   |
|               | rs17033                         | G (A)               | 8.7                | 7.6, 9.9   | 8.3    | 7.2, 9.5   | 6.9                | 5.3, 9.0   | 6.9    | 5.8, 8.1   | 30.8             | 28.6, 33.1 | 29.2   | 27.0, 31.4 |
|               | rs2066702                       | T (C)               | 0.4                | 0.2, 1.0   | 0.3    | 0.2, 0.6   | 20.7               | 18.1, 23.7 | 19.3   | 17.7, 21.1 | 1.0              | 0.6, 1.7   | 0.7    | 0.4, 1.2   |
| <i>ADH1C</i>  | rs1693482                       | A (G)               | 38.0               | 34.1, 42.1 | 38.9   | 36.1, 41.8 | 15.3               | 13.0, 17.9 | 13.9   | 11.9, 16.2 | 33.0             | 30.4, 35.7 | 35.3   | 33.2, 37.4 |
|               | rs698                           | G (A)               | 39.0               | 35.1, 43.0 | 39.9   | 37.2, 42.6 | 15.9               | 13.4, 18.8 | 14.0   | 12.1, 16.3 | 30.1             | 27.8, 32.5 | 32.2   | 29.8, 34.8 |
| <i>ADRB1</i>  | rs1801252                       | G (A)               | 13.4               | 11.0, 16.4 | 13.0   | 10.9, 15.5 | 21.9               | 19.9, 23.9 | 22.9   | 21.2, 24.8 | 28.1             | 26.1, 30.2 | 27.9   | 25.2, 30.8 |
| <i>ADRB2</i>  | rs1042713                       | A (G)               | 38.9               | 36.4, 41.4 | 38.9   | 36.2, 41.6 | 49.7               | 46.7, 52.8 | 49.6   | 47.3, 52.0 | 41.7             | 39.7, 43.7 | 41.8   | 39.5, 44.1 |
|               | rs1042714                       | G (C)               | 41.1               | 38.6, 43.5 | 42.7   | 39.7, 45.8 | 17.5               | 15.6, 19.5 | 18.5   | 16.8, 20.3 | 21.3             | 19.5, 23.2 | 21.3   | 19.6, 23.2 |
| <i>ADRB3</i>  | rs4994                          | C (T)               | 6.8                | 5.3, 8.6   | 6.9    | 5.8, 8.2   | 11.9               | 10.0, 14.0 | 11.5   | 10.1, 13.1 | 17.8             | 15.8, 19.9 | 15.4   | 13.3, 17.7 |
| <i>ALAD</i>   | rs1800435                       | C (G)               | 8.0                | 6.4, 10.0  | 8.1    | 7.0, 9.4   | 1.6                | 0.9, 2.7   | 1.1    | 0.7, 1.8   | 4.8              | 4.0, 5.8   | 4.2    | 3.0, 5.7   |
| <i>CAPN10</i> | rs3792267                       | A (G)               | 25.4               | 22.5, 28.5 | 26.1   | 24.1, 28.2 | 16.3               | 14.1, 18.8 | 16.0   | 13.8, 18.6 | 26.6             | 24.5, 28.9 | 28.1   | 25.0, 31.3 |
| <i>B9D2</i>   | rs1800468                       | A (G)               | 7.8                | 6.4, 9.6   | 7.5    | 6.6, 8.4   | 2.8                | 1.8, 4.3   | 2.8    | 2.0, 3.8   | 4.6              | 3.7, 5.7   | 4.7    | 3.8, 5.8   |
|               | rs1800469                       | T (C)               | 30.7               | 27.6, 34.1 | 32.1   | 30.3, 34.0 | 25.8               | 23.5, 28.2 | 22.1   | 20.2, 24.2 | 44.5             | 41.1, 47.9 | 45.1   | 43.6, 46.5 |
| <i>CAT</i>    | rs769214                        | G (A)               | 66.8               | 62.7, 70.8 | 65.4   | 63.1, 67.7 | 60.3               | 56.9, 63.7 | 57.6   | 55.2, 59.9 | 49.5             | 47.8, 51.2 | 49.9   | 48.1, 51.7 |
| <i>CBS</i>    | 844ins68bp                      | + (-)               | 8.0                | 6.5, 9.7   | 8.2    | 7.1, 9.6   | 26.3               | 23.1, 29.9 | 25.5   | 23.6, 27.4 | 6.1              | 5.4, 6.9   | 6.6    | 5.2, 8.2   |
| <i>CCL5</i>   | rs2280788                       | G (C)               | 2.6                | 2.0, 3.5   | 3.0    | 2.4, 3.7   | 0.7                | 0.3, 1.4   | 0.6    | 0.3, 1.2   | 1.1              | 0.6, 2.2   | 1.5    | 0.9, 2.4   |
| <i>CCR2</i>   | rs1799864                       | A (G)               | 8.9                | 7.3, 10.9  | 10.0   | 7.7, 12.8  | 13.6               | 12.1, 15.3 | 15.2   | 14.0, 16.5 | 20.7             | 18.3, 23.4 | 22.8   | 20.7, 25.1 |

| Gene symbol    | Variant (dbSNP ID) <sup>a</sup> | Allele <sup>b</sup> | Non-Hispanic white |            |        |            | Non-Hispanic black |            |        |            | Mexican-American |            |        |            |
|----------------|---------------------------------|---------------------|--------------------|------------|--------|------------|--------------------|------------|--------|------------|------------------|------------|--------|------------|
|                |                                 |                     | Male               |            | Female |            | Male               |            | Female |            | Male             |            | Female |            |
|                |                                 |                     | %                  | 95% CI     | %      | 95% CI     | %                  | 95% CI     | %      | 95% CI     | %                | 95% CI     | %      | 95% CI     |
| <i>CXCL12</i>  | rs169097                        | T (C)               | 0.4                | 0.2, 0.7   | 0.2    | 0.1, 0.7   | 17.4               | 15.0, 20.1 | 16.9   | 14.8, 19.3 | 1.2              | 0.7, 2.1   | 0.7    | 0.4, 1.3   |
| <i>CYP1A1</i>  | rs2472299                       | T (C)               | 28.1               | 25.4, 31.0 | 28.3   | 26.6, 30.1 | 38.7               | 35.8, 41.6 | 38.3   | 35.3, 41.4 | 26.6             | 23.0, 30.5 | 26.8   | 24.8, 28.9 |
|                | rs2606345                       | G (T)               | 35.6               | 32.3, 39.1 | 32.0   | 29.9, 34.1 | 84.2               | 81.4, 86.7 | 84.0   | 80.7, 86.8 | 61.1             | 58.5, 63.8 | 62.3   | 59.3, 65.1 |
| <i>CYP1A2</i>  | rs11854147                      | T (C)               | 31.5               | 28.4, 34.8 | 31.2   | 29.4, 33.1 | 72.3               | 69.7, 74.8 | 71.9   | 68.9, 74.7 | 60.6             | 56.8, 64.4 | 62.1   | 57.6, 66.3 |
|                | rs2069514                       | A (G)               | 2.1                | 1.1, 4.0   | 1.1    | 0.7, 1.9   | 26.3               | 24.7, 28.0 | 26.2   | 24.3, 28.2 | 32.7             | 28.6, 37.1 | 34.7   | 31.0, 38.6 |
|                | rs4886406                       | G (T)               | 27.5               | 24.7, 30.5 | 28.1   | 26.5, 29.7 | 38.8               | 35.6, 42.1 | 38.0   | 35.0, 41.0 | 26.7             | 23.5, 30.2 | 26.4   | 24.4, 28.5 |
| <i>CYP1B1</i>  | rs1056836                       | G (C)               | 44.7               | 41.0, 48.5 | 45.6   | 43.2, 48.1 | 75.2               | 72.6, 77.7 | 74.8   | 72.3, 77.1 | 26.1             | 23.3, 29.1 | 27.0   | 24.1, 30.1 |
|                | rs1056837                       | T (C)               | 44.6               | 41.4, 47.8 | 45.4   | 42.7, 48.0 | 72.8               | 70.0, 75.5 | 72.6   | 70.2, 74.9 | 25.9             | 22.9, 29.1 | 26.7   | 23.8, 30.0 |
|                | rs162557                        | T (C)               | 22.2               | 19.6, 25.1 | 24.2   | 21.9, 26.6 | 21.3               | 19.1, 23.6 | 21.9   | 19.4, 24.7 | 12.5             | 10.6, 14.8 | 13.6   | 11.3, 16.3 |
| <i>CYP2A6</i>  | rs1801272                       | A (T)               | 3.6                | 2.6, 4.8   | 3.0    | 2.4, 3.8   | 0.6                | 0.3, 1.3   | 0.6    | 0.3, 1.1   | 2.0              | 1.4, 2.8   | 2.0    | 1.4, 2.8   |
| <i>CYP2C19</i> | rs4986893                       | A (G)               | 0.1                | 0.0, 0.5   | 0.1    | 0.1, 0.3   | 0.1                | 0.0, 0.5   | 0.2    | 0.1, 0.6   | 0.1              | 0.0, 0.2   | 0.1    | 0.0, 0.6   |
|                | rs4986894                       | C (T)               | 12.5               | 10.6, 14.6 | 14.8   | 13.1, 16.8 | 17.2               | 15.0, 19.6 | 19.3   | 17.5, 21.3 | 10.0             | 8.0, 12.5  | 12.1   | 9.9, 14.7  |
| <i>CYP2C9</i>  | rs1057910                       | C (A)               | 6.2                | 5.0, 7.8   | 7.3    | 6.5, 8.2   | 1.3                | 0.8, 2.3   | 0.8    | 0.5, 1.4   | 4.3              | 3.1, 5.9   | 3.5    | 2.6, 4.6   |
| <i>CYP2E1</i>  | rs2031920                       | T (C)               | 2.6                | 1.8, 3.6   | 1.9    | 1.4, 2.6   | 0.8                | 0.4, 1.4   | 0.8    | 0.4, 1.3   | 11.1             | 9.7, 12.6  | 10.2   | 9.0, 11.6  |
| <i>CYP3A4</i>  | rs2740574                       | G (A)               | 4.4                | 3.2, 5.9   | 3.8    | 3.1, 4.7   | 64.3               | 61.5, 66.9 | 63.8   | 61.3, 66.3 | 7.4              | 6.4, 8.6   | 7.9    | 6.2, 10.1  |
| <i>F2</i>      | rs1799963                       | A (G)               | 1.1                | 0.7, 1.7   | 1.2    | 0.7, 1.9   | 0.2                | 0.0, 0.6   | 0.4    | 0.2, 0.7   | 0.8              | 0.5, 1.2   | 1.4    | 0.8, 2.5   |
| <i>F5</i>      | rs6025                          | A (G)               | 2.7                | 1.8, 3.8   | 2.5    | 2.1, 3.1   | 0.6                | 0.4, 1.0   | 0.6    | 0.3, 1.3   | 1.3              | 0.8, 2.1   | 0.7    | 0.4, 1.3   |
| <i>FAM82A</i>  | rs163086                        | T (C)               | 23.2               | 20.8, 25.7 | 22.5   | 20.1, 25.1 | 19.5               | 17.5, 21.7 | 18.8   | 16.3, 21.6 | 15.1             | 12.6, 18.0 | 13.9   | 12.6, 15.4 |
| <i>FCGR2A</i>  | rs1801274                       | A (G)               | 48.1               | 44.9, 51.3 | 50.6   | 48.5, 52.8 | 46.8               | 44.4, 49.2 | 48.0   | 45.9, 50.0 | 48.9             | 46.7, 51.1 | 48.3   | 45.6, 51.0 |
| <i>FGB</i>     | rs1800790                       | A (G)               | 19.5               | 17.8, 21.3 | 19.3   | 17.5, 21.2 | 5.7                | 4.7, 6.9   | 5.4    | 4.0, 7.1   | 15.5             | 14.0, 17.1 | 14.4   | 12.5, 16.4 |

| Gene symbol  | Variant (dbSNP ID) <sup>a</sup> | Allele <sup>b</sup> | Non-Hispanic white |            |        |            | Non-Hispanic black |            |        |            | Mexican-American |            |        |            |
|--------------|---------------------------------|---------------------|--------------------|------------|--------|------------|--------------------|------------|--------|------------|------------------|------------|--------|------------|
|              |                                 |                     | Male               |            | Female |            | Male               |            | Female |            | Male             |            | Female |            |
|              |                                 |                     | %                  | 95% CI     | %      | 95% CI     | %                  | 95% CI     | %      | 95% CI     | %                | 95% CI     | %      | 95% CI     |
| <i>IL10</i>  | rs1800871                       | T (C)               | 24.0               | 21.2, 27.0 | 24.3   | 22.3, 26.5 | 39.7               | 37.0, 42.4 | 39.6   | 37.1, 42.1 | 37.9             | 33.9, 42.1 | 38.3   | 35.1, 41.6 |
|              | rs1800872                       | A (C)               | 24.2               | 21.5, 27.3 | 24.4   | 22.5, 26.5 | 39.3               | 36.8, 41.9 | 39.3   | 36.8, 41.8 | 37.8             | 33.8, 41.9 | 38.1   | 35.0, 41.3 |
|              | rs1800896                       | G (A)               | 46.1               | 43.3, 48.8 | 47.7   | 44.8, 50.5 | 35.8               | 33.1, 38.5 | 35.5   | 33.2, 38.0 | 31.6             | 28.3, 35.1 | 29.3   | 26.8, 31.9 |
| <i>IL1B</i>  | rs1143623                       | C (G)               | 28.9               | 25.9, 32.0 | 28.1   | 25.3, 31.2 | 11.3               | 9.9, 12.8  | 11.2   | 9.6, 13.1  | 44.5             | 40.9, 48.2 | 41.2   | 39.1, 43.4 |
| <i>IL4</i>   | rs2243248*                      | G (T)               | 8.5                | 7.4, 9.7   | 6.6    | 5.8, 7.5   | 15.8               | 14.2, 17.6 | 15.7   | 13.9, 17.7 | 12.0             | 10.2, 14.2 | 12.0   | 9.4, 15.2  |
|              | rs2243250                       | T (C)               | 15.6               | 13.9, 17.6 | 16.3   | 14.8, 18.0 | 64.8               | 61.1, 68.4 | 63.2   | 60.7, 65.7 | 42.9             | 40.0, 45.8 | 41.6   | 39.9, 43.3 |
|              | rs2243270                       | G (A)               | 16.0               | 14.1, 17.9 | 16.8   | 15.3, 18.3 | 65.0               | 61.9, 68.0 | 62.6   | 60.4, 64.8 | 42.3             | 38.9, 45.7 | 41.2   | 39.2, 43.3 |
| <i>ILAR</i>  | rs1801275                       | G (A)               | 20.7               | 18.7, 22.8 | 20.9   | 19.1, 22.7 | 68.9               | 65.9, 71.8 | 65.6   | 62.7, 68.3 | 29.2             | 26.6, 32.1 | 28.0   | 24.7, 31.6 |
|              | rs1805015                       | C (T)               | 15.9               | 14.3, 17.6 | 15.5   | 13.8, 17.4 | 39.6               | 37.0, 42.4 | 34.3   | 31.8, 36.9 | 15.8             | 13.9, 17.8 | 15.6   | 13.0, 18.6 |
| <i>ITGA2</i> | rs1126643                       | T (C)               | 40.9               | 38.3, 43.6 | 41.4   | 38.8, 44.0 | 30.4               | 27.2, 33.8 | 29.0   | 26.7, 31.4 | 44.8             | 42.2, 47.4 | 44.4   | 42.8, 46.1 |
| <i>ITGB3</i> | rs5918                          | C (T)               | 16.3               | 14.3, 18.5 | 16.3   | 14.7, 18.0 | 9.6                | 8.5, 10.8  | 10.5   | 9.4, 11.7  | 10.2             | 8.7, 11.8  | 9.1    | 7.2, 11.5  |
| <i>MBL2</i>  | rs11003125                      | G (C)               | 35.8               | 33.8, 37.8 | 36.9   | 34.6, 39.3 | 13.7               | 12.0, 15.7 | 12.1   | 10.7, 13.7 | 51.7             | 48.5, 54.9 | 50.2   | 48.2, 52.3 |
|              | rs1800450                       | A(G)                | 14.3               | 12.4, 16.6 | 14.8   | 13.2, 16.5 | 4.5                | 3.6, 5.7   | 3.6    | 2.6, 5.0   | 14.8             | 13.0, 16.8 | 14.4   | 12.0, 17.1 |
|              | rs1800451                       | A (G)               | 1.7                | 1.2, 2.4   | 2.2    | 1.6, 3.1   | 22.5               | 19.8, 25.3 | 24.0   | 21.9, 26.1 | 2.4              | 1.7, 3.3   | 2.7    | 2.1, 3.5   |
|              | rs5030737                       | T (C)               | 7.0                | 5.5, 8.9   | 7.8    | 6.9, 8.8   | 0.8                | 0.5, 1.4   | 1.4    | 0.9, 2.0   | 2.7              | 1.9, 3.7   | 3.2    | 2.4, 4.2   |
|              | rs7096206                       | C (G)               | 21.8               | 19.7, 24.0 | 22.9   | 20.5, 25.6 | 14.2               | 12.3, 16.3 | 15.9   | 14.0, 18.1 | 10.4             | 8.6, 12.7  | 12.4   | 10.1, 15.1 |
| <i>MTHFR</i> | rs1801131                       | C (A)               | 31.4               | 27.5, 35.5 | 30.9   | 28.1, 33.8 | 18.7               | 16.9, 20.6 | 17.3   | 15.9, 18.7 | 18.4             | 15.4, 21.7 | 19.2   | 15.8, 23.2 |
|              | rs1801133                       | T (C)               | 31.6               | 28.1, 35.3 | 33.5   | 30.7, 36.4 | 11.9               | 10.4, 13.7 | 11.3   | 10.3, 12.4 | 45.2             | 41.1, 49.4 | 43.9   | 41.7, 46.1 |
|              | rs2066470                       | T (C)               | 10.0               | 8.0, 12.4  | 9.1    | 7.7, 10.8  | 7.8                | 6.4, 9.4   | 9.5    | 7.8, 11.4  | 6.4              | 5.1, 8.1   | 6.6    | 5.1, 8.5   |
| <i>MTRR</i>  | rs1801394                       | G (A)               | 52.0               | 49.7, 54.3 | 53.6   | 51.7, 55.4 | 29.0               | 26.1, 32.0 | 28.5   | 26.4, 30.8 | 25.7             | 22.6, 29.0 | 26.5   | 24.5, 28.6 |
| <i>NAT2</i>  | rs1041983                       | T (C)               | 34.8               | 32.9, 36.7 | 36.1   | 34.1, 38.1 | 46.4               | 43.1, 49.8 | 45.8   | 44.3, 47.4 | 32.3             | 29.4, 35.3 | 31.5   | 28.8, 34.2 |
|              | rs1208                          | G (A)               | 41.6               | 39.8, 43.5 | 40.5   | 38.7, 42.3 | 38.1               | 35.6, 40.5 | 38.5   | 36.8, 40.1 | 35.3             | 32.1, 38.6 | 36.1   | 33.9, 38.4 |
|              | rs1799930                       | A (G)               | 31.7               | 29.9, 33.6 | 32.9   | 30.7, 35.1 | 28.7               | 25.4, 32.3 | 27.4   | 25.8, 29.0 | 18.1             | 16.2, 20.3 | 17.8   | 14.9, 21.1 |
|              | rs1801279                       | A (G)               | 0.0                | 0.0, 0.3   | 0.0    | 0.0, 0.1   | 7.5                | 6.6, 8.5   | 8.1    | 6.9, 9.5   | 0.5              | 0.2, 1.2   | 0.5    | 0.2, 1.0   |
|              | rs1801280                       | C (T)               | 42.5               | 40.5, 44.5 | 41.8   | 40.0, 43.5 | 30.2               | 28.1, 32.5 | 28.5   | 26.5, 30.5 | 31.6             | 28.2, 35.2 | 33.2   | 30.3, 36.2 |

| Gene symbol     | Variant (dbSNP ID) <sup>a</sup> | Allele <sup>b</sup> | Non-Hispanic white |            |        |            | Non-Hispanic black |            |        |            | Mexican-American |            |        |            |
|-----------------|---------------------------------|---------------------|--------------------|------------|--------|------------|--------------------|------------|--------|------------|------------------|------------|--------|------------|
|                 |                                 |                     | Male               |            | Female |            | Male               |            | Female |            | Male             |            | Female |            |
|                 |                                 |                     | %                  | 95% CI     | %      | 95% CI     | %                  | 95% CI     | %      | 95% CI     | %                | 95% CI     | %      | 95% CI     |
| <i>NOS2A</i>    | rs1800482*                      | C (G)               | 0.1                | 0.0, 0.3   | 0.0    | 0.0, 0.1   | 7.0                | 5.3, 9.2   | 5.6    | 4.4, 7.1   | 0.2              | 0.1, 0.6   | 0.3    | 0.1, 1.3   |
|                 | rs9282799                       | T (C)               | 0.0                | 0.0, 0.1   | 0.0    | 0.0, 0.2   | 5.4                | 4.3, 6.6   | 3.8    | 3.0, 4.7   | 0.3              | 0.1, 1.0   | 0.5    | 0.3, 0.9   |
| <i>NOS3</i>     | rs1799983                       | T (G)               | 32.2               | 28.9, 35.8 | 32.8   | 30.7, 35.0 | 13.2               | 11.7, 14.8 | 13.1   | 11.0, 15.5 | 20.4             | 17.9, 23.1 | 18.8   | 16.9, 20.9 |
|                 | rs2070744                       | C (T)               | 37.8               | 34.6, 41.1 | 40.3   | 38.3, 42.5 | 15.6               | 13.8, 17.6 | 14.8   | 12.8, 17.0 | 25.7             | 23.2, 28.3 | 24.6   | 22.1, 27.2 |
| <i>NQO1</i>     | rs10517                         | T (C)               | 13.4               | 11.9, 15.2 | 12.9   | 11.2, 14.9 | 14.8               | 12.8, 17.1 | 13.1   | 11.0, 15.5 | 6.2              | 4.3, 8.8   | 6.8    | 5.5, 8.5   |
|                 | rs1800566                       | T (C)               | 18.8               | 16.6, 21.3 | 19.9   | 18.0, 22.0 | 19.4               | 17.1, 22.0 | 18.4   | 17.2, 19.6 | 37.9             | 35.4, 40.4 | 35.7   | 33.3, 38.2 |
|                 | rs34755915                      | A (G)               | 2.0                | 1.5, 2.6   | 1.7    | 1.2, 2.3   | 0.5                | 0.2, 1.3   | 0.3    | 0.2, 0.7   | 0.6              | 0.3, 1.3   | 0.4    | 0.3, 0.7   |
|                 | rs689452                        | G (C)               | 12.1               | 10.6, 13.9 | 11.7   | 10.2, 13.4 | 14.9               | 12.7, 17.3 | 12.8   | 10.7, 15.2 | 6.2              | 4.3, 8.8   | 6.5    | 5.1, 8.3   |
|                 | rs689453                        | A (G)               | 8.7                | 7.0, 10.8  | 7.0    | 6.2, 8.0   | 4.5                | 3.4, 5.9   | 5.6    | 4.4, 7.0   | 5.3              | 3.6, 7.6   | 5.2    | 3.9, 6.7   |
| <i>OGG1</i>     | rs1052133                       | G (C)               | 21.5               | 19.2, 24.0 | 21.4   | 19.4, 23.6 | 16.1               | 14.5, 17.9 | 16.7   | 14.8, 18.8 | 32.0             | 29.7, 34.5 | 33.9   | 31.2, 36.8 |
| <i>PON1</i>     | rs662                           | G (A)               | 31.9               | 28.9, 35.0 | 31.1   | 28.8, 33.4 | 67.4               | 65.1, 69.6 | 66.9   | 64.5, 69.2 | 45.8             | 43.2, 48.5 | 47.3   | 45.1, 49.5 |
|                 | rs854560                        | A (T)               | 35.9               | 32.1, 40.0 | 35.3   | 33.5, 37.2 | 16.9               | 14.5, 19.6 | 18.8   | 17.2, 20.4 | 24.8             | 22.8, 26.9 | 21.2   | 19.4, 23.1 |
| <i>PPARG</i>    | rs1801282                       | G (C)               | 13.1               | 11.1, 15.5 | 13.3   | 11.9, 14.7 | 2.8                | 1.9, 4.1   | 2.3    | 1.7, 3.1   | 11.8             | 10.1, 13.8 | 13.0   | 11.3, 14.9 |
| <i>SERPINE1</i> | rs1799762 <sup>c</sup>          | 4G (5G)             | 52.5               | 49.5, 55.5 | 52.5   | 50.8, 54.3 | 27.2               | 25.3, 29.1 | 26.3   | 24.2, 28.5 | 33.2             | 30.5, 36.1 | 34.8   | 31.8, 38.0 |
| <i>TGFB1</i>    | rs1982073                       | C (T)               | 37.6               | 34.4, 41.0 | 39.2   | 37.6, 40.9 | 46.0               | 43.9, 48.1 | 42.3   | 39.5, 45.1 | 49.9             | 47.5, 52.4 | 50.6   | 48.5, 52.8 |
| <i>TLR4</i>     | rs4986790                       | G (A)               | 7.0                | 5.7, 8.4   | 6.7    | 5.9, 7.5   | 7.5                | 6.4, 8.7   | 7.5    | 6.6, 8.4   | 2.0              | 1.4, 2.8   | 2.9    | 1.9, 4.6   |
| <i>TNF</i>      | rs1800629                       | A (G)               | 16.2               | 13.9, 18.7 | 18.3   | 16.0, 20.8 | 11.7               | 9.9, 13.8  | 14.3   | 12.8, 16.0 | 6.5              | 4.8, 8.7   | 8.2    | 6.7, 9.9   |
|                 | rs1800750                       | A (G)               | 1.3                | 0.9, 2.0   | 1.3    | 0.7, 2.4   | 2.4                | 1.7, 3.5   | 2.3    | 1.7, 3.0   | 2.6              | 2.0, 3.2   | 2.4    | 1.8, 3.2   |
|                 | rs361525*                       | A (G)               | 5.1                | 4.2, 6.2   | 6.3    | 5.4, 7.4   | 3.9                | 3.0, 5.1   | 4.3    | 3.2, 5.7   | 5.2              | 4.2, 6.5   | 6.5    | 5.7, 7.4   |
| <i>VDR</i>      | rs2239185                       | C (T)               | 48.2               | 45.0, 51.5 | 47.5   | 44.5, 50.5 | 42.4               | 40.5, 44.3 | 43.3   | 40.7, 46.0 | 58.2             | 54.7, 61.6 | 58.2   | 54.6, 61.7 |
|                 | rs731236                        | C (T)               | 37.5               | 34.7, 40.4 | 38.7   | 36.5, 41.0 | 28.6               | 26.4, 30.9 | 27.8   | 25.7, 30.0 | 23.5             | 21.0, 26.2 | 24.1   | 21.6, 26.7 |
| <i>XRCC1</i>    | rs1001581                       | A (G)               | 40.2               | 37.1, 43.4 | 39.6   | 37.3, 42.0 | 36.5               | 34.3, 38.8 | 36.8   | 35.0, 38.6 | 30.2             | 27.1, 33.4 | 30.2   | 27.6, 33.0 |
|                 | rs1799782                       | T (C)               | 4.3                | 3.2, 5.6   | 5.6    | 4.9, 6.4   | 6.8                | 5.3, 8.5   | 5.7    | 5.0, 6.5   | 14.5             | 12.7, 16.5 | 15.1   | 13.2, 17.2 |
|                 | rs25486                         | G (A)               | 37.2               | 34.3, 40.0 | 34.9   | 32.6, 37.2 | 24.7               | 22.2, 27.4 | 23.7   | 21.4, 26.1 | 26.7             | 24.1, 29.4 | 24.8   | 23.0, 26.7 |

| Gene symbol | Variant (dbSNP ID) <sup>a</sup> | Allele <sup>b</sup> | Non-Hispanic white |            |        |            | Non-Hispanic black |            |        |            | Mexican-American |            |        |            |
|-------------|---------------------------------|---------------------|--------------------|------------|--------|------------|--------------------|------------|--------|------------|------------------|------------|--------|------------|
|             |                                 |                     | Male               |            | Female |            | Male               |            | Female |            | Male             |            | Female |            |
|             |                                 |                     | %                  | 95% CI     | %      | 95% CI     | %                  | 95% CI     | %      | 95% CI     | %                | 95% CI     | %      | 95% CI     |
|             | rs25487                         | A (G)               | 37.3               | 34.5, 40.1 | 35.0   | 32.8, 37.2 | 16.3               | 14.1, 18.7 | 15.6   | 13.8, 17.5 | 26.5             | 24.1, 28.9 | 24.7   | 22.7, 26.8 |
|             | rs25489                         | A (G)               | 3.9                | 3.0, 5.2   | 4.0    | 3.2, 5.0   | 2.9                | 2.1, 4.0   | 4.0    | 2.8, 5.6   | 11.7             | 10.0, 13.6 | 13.2   | 10.9, 16.0 |

CI, confidence interval.

\*  $P \leq 0.05$  for allele frequency by sex after adjustment for race/ethnicity.

<sup>a</sup> Unique identifier in the Entrez SNP (single-nucleotide polymorphism) database at the National Center for Biotechnology Information (<http://www.ncbi.nlm.nih.gov/projects/SNP/>).

<sup>b</sup> Major allele is in parentheses.

<sup>c</sup> Variant also known as rs1799768 and rs1799889.

**Appendix 8. Weighted Genotype Prevalence in the US population, by Race/Ethnicity and by Sex, Third National Health and Nutrition Examination Survey (NHANES III), Phase 2 (1991–1994)**

| Gene symbol  | Variant (dbSNP ID) <sup>a</sup> | Genotype | Non-Hispanic white |            |        |            | Non-Hispanic black |            |        |            | Mexican-American |            |        |            |
|--------------|---------------------------------|----------|--------------------|------------|--------|------------|--------------------|------------|--------|------------|------------------|------------|--------|------------|
|              |                                 |          | Male               |            | Female |            | Male               |            | Female |            | Male             |            | Female |            |
|              |                                 |          | %                  | 95% CI     | %      | 95% CI     | %                  | 95% CI     | %      | 95% CI     | %                | 95% CI     | %      | 95% CI     |
| <i>ABCB1</i> | rs1045642                       | CC       | 25.6               | 22.5, 28.9 | 23.3   | 20.4, 26.4 | 62.5               | 59.2, 65.8 | 63.9   | 61.0, 66.7 | 30.2             | 26.4, 34.3 | 31.2   | 27.0, 35.7 |
|              |                                 | CT       | 49.1               | 45.5, 52.6 | 47.0   | 44.1, 49.9 | 32.3               | 28.6, 36.2 | 31.0   | 28.3, 33.8 | 49.6             | 45.6, 53.6 | 48.7   | 43.9, 53.6 |
|              |                                 | TT       | 25.4               | 23.1, 27.8 | 29.7   | 26.7, 32.9 | 5.2                | 4.0, 6.7   | 5.2    | 3.8, 6.9   | 20.2             | 18.0, 22.6 | 20.0   | 15.7, 25.3 |
| <i>ACE</i>   | rs4646994                       | DD       | 28.6               | 24.7, 32.9 | 28.9   | 25.7, 32.4 | 34.5               | 31.2, 38.0 | 33.2   | 30.4, 36.1 | 19.6             | 15.9, 24.0 | 21.7   | 18.2, 25.7 |
|              |                                 | DI       | 51.0               | 45.7, 56.3 | 52.1   | 47.9, 56.3 | 50.0               | 46.3, 53.6 | 49.6   | 46.6, 52.6 | 52.9             | 49.9, 55.8 | 51.0   | 48.2, 53.8 |
|              |                                 | II       | 20.4               | 17.2, 24.0 | 19.0   | 16.2, 22.1 | 15.5               | 12.6, 19.0 | 17.2   | 14.8, 19.9 | 27.5             | 24.3, 30.9 | 27.3   | 24.9, 29.8 |
| <i>ADH1B</i> | rs1229984                       | AA       | 0.2                | 0.0, 1.0   | 0.2    | 0.0, 0.7   | 0.0                | NA         | 0.0    | NA         | 0.1              | 0.0, 0.6   | 0.0    | 0.0, 0.2   |
|              |                                 | AG       | 10.2               | 8.3, 12.6  | 7.9    | 5.8, 10.5  | 3.3                | 1.5, 6.8   | 2.3    | 1.4, 3.6   | 9.7              | 8.4, 11.3  | 11.9   | 9.8, 14.3  |
|              |                                 | GG       | 89.6               | 87.1, 91.7 | 92.0   | 89.2, 94.1 | 96.7               | 93.2, 98.5 | 97.7   | 96.4, 98.6 | 90.2             | 88.7, 91.5 | 88.1   | 85.6, 90.2 |
|              | rs17033                         | AA       | 83.0               | 80.8, 85.1 | 84.6   | 82.4, 86.6 | 86.8               | 83.2, 89.8 | 86.9   | 84.6, 88.9 | 47.8             | 44.0, 51.7 | 50.8   | 47.9, 53.8 |
|              |                                 | AG       | 16.7               | 14.6, 18.9 | 14.2   | 12.3, 16.5 | 12.5               | 9.8, 15.8  | 12.5   | 10.6, 14.7 | 42.7             | 38.2, 47.3 | 39.9   | 37.2, 42.7 |
|              |                                 | GG       | 0.3                | 0.1, 1.6   | 1.2    | 0.7, 2.0   | 0.7                | 0.3, 1.6   | 0.6    | 0.2, 1.7   | 9.5              | 7.4, 12.1  | 9.2    | 7.2, 11.7  |
|              | rs2066702                       | CC       | 99.1               | 97.9, 99.6 | 99.3   | 98.7, 99.6 | 63.1               | 58.3, 67.7 | 64.7   | 61.4, 67.9 | 98.0             | 96.7, 98.7 | 98.6   | 97.7, 99.2 |
|              |                                 | CT       | 0.9                | 0.4, 2.1   | 0.7    | 0.4, 1.3   | 32.3               | 28.2, 36.8 | 31.9   | 28.6, 35.4 | 2.0              | 1.3, 3.3   | 1.4    | 0.8, 2.3   |
|              |                                 | TT       | 0.0                | NA         | 0.0    | NA         | 4.6                | 3.1, 6.7   | 3.4    | 2.4, 4.7   | 0.0              | NA         | 0.0    | NA         |
| <i>ADH1C</i> | rs1693482                       | AA       | 15.5               | 12.9, 18.6 | 15.6   | 13.1, 18.4 | 2.2                | 1.2, 3.9   | 2.3    | 1.4, 3.8   | 10.5             | 8.1, 13.5  | 11.8   | 9.4, 14.8  |
|              |                                 | AG       | 45.0               | 40.8, 49.2 | 46.7   | 43.5, 49.9 | 26.2               | 21.9, 30.9 | 23.2   | 20.2, 26.5 | 45.0             | 41.6, 48.5 | 46.9   | 43.0, 50.9 |
|              |                                 | GG       | 39.5               | 34.0, 45.3 | 37.8   | 34.0, 41.7 | 71.6               | 66.9, 75.9 | 74.5   | 70.7, 77.9 | 44.5             | 40.9, 48.1 | 41.3   | 38.3, 44.3 |
|              | rs698                           | AA       | 38.2               | 32.3, 44.5 | 36.5   | 33.2, 40.0 | 70.7               | 65.5, 75.4 | 74.2   | 70.6, 77.5 | 50.2             | 47.5, 53.0 | 48.1   | 44.8, 51.4 |
|              |                                 | AG       | 45.5               | 40.4, 50.7 | 47.2   | 44.5, 50.0 | 26.8               | 22.2, 32.0 | 23.5   | 20.6, 26.6 | 39.4             | 36.1, 42.8 | 39.3   | 35.7, 43.1 |
|              |                                 | GG       | 16.3               | 13.7, 19.2 | 16.2   | 13.8, 19.0 | 2.5                | 1.5, 4.2   | 2.3    | 1.4, 3.8   | 10.4             | 7.7, 13.8  | 12.6   | 10.0, 15.7 |
| <i>ADRB1</i> | rs1801252                       | AA       | 75.3               | 70.8, 79.4 | 76.2   | 72.1, 79.8 | 60.9               | 57.6, 64.1 | 59.9   | 56.4, 63.3 | 52.2             | 48.8, 55.6 | 51.5   | 46.8, 56.1 |
|              |                                 | AG       | 22.4               | 19.2, 26.1 | 21.6   | 18.4, 25.2 | 34.4               | 31.0, 38.1 | 34.4   | 30.6, 38.4 | 39.4             | 36.3, 42.6 | 41.2   | 37.1, 45.5 |
|              |                                 | GG       | 2.2                | 1.1, 4.3   | 2.2    | 1.3, 3.8   | 4.7                | 3.1, 7.0   | 5.7    | 4.5, 7.3   | 8.4              | 7.2, 9.7   | 7.3    | 5.8, 9.1   |

| Gene symbol   | Variant (dbSNP ID) <sup>a</sup> | Genotype | Non-Hispanic white |            |        |            | Non-Hispanic black |            |        |            | Mexican-American |            |        |            |
|---------------|---------------------------------|----------|--------------------|------------|--------|------------|--------------------|------------|--------|------------|------------------|------------|--------|------------|
|               |                                 |          | Male               |            | Female |            | Male               |            | Female |            | Male             |            | Female |            |
|               |                                 |          | %                  | 95% CI     | %      | 95% CI     | %                  | 95% CI     | %      | 95% CI     | %                | 95% CI     | %      | 95% CI     |
| <i>ADRB2</i>  | rs1042713                       | AA       | 15.0               | 12.4, 17.9 | 16.3   | 13.8, 19.2 | 24.9               | 21.8, 28.3 | 25.1   | 22.9, 27.5 | 15.5             | 13.6, 17.7 | 15.7   | 13.8, 17.8 |
|               |                                 | AG       | 47.9               | 42.7, 53.1 | 45.1   | 41.7, 48.5 | 49.7               | 45.8, 53.6 | 49.0   | 46.0, 52.0 | 52.4             | 49.4, 55.4 | 52.1   | 49.0, 55.3 |
|               |                                 | GG       | 37.1               | 33.0, 41.5 | 38.6   | 35.0, 42.3 | 25.4               | 21.7, 29.6 | 25.8   | 22.8, 29.2 | 32.1             | 29.2, 35.0 | 32.2   | 28.8, 35.7 |
|               | rs1042714                       | CC       | 34.8               | 31.8, 38.0 | 34.2   | 30.2, 38.4 | 67.9               | 64.8, 70.8 | 67.4   | 64.0, 70.6 | 61.5             | 57.9, 65.0 | 61.2   | 58.7, 63.7 |
|               |                                 | CG       | 48.3               | 44.5, 52.1 | 46.3   | 42.7, 49.9 | 29.3               | 26.8, 31.9 | 28.3   | 24.9, 32.0 | 34.4             | 30.5, 38.5 | 34.9   | 32.9, 36.9 |
|               |                                 | GG       | 16.9               | 14.0, 20.3 | 19.6   | 16.9, 22.6 | 2.8                | 1.8, 4.4   | 4.3    | 3.1, 6.0   | 4.1              | 2.8, 6.1   | 3.9    | 2.6, 5.8   |
| <i>ADRB3</i>  | rs4994                          | CC       | 0.7                | 0.3, 1.6   | 0.5    | 0.2, 1.1   | 1.8                | 0.8, 3.8   | 1.1    | 0.5, 2.3   | 3.1              | 2.0, 4.9   | 2.3    | 1.4, 3.9   |
|               |                                 | CT       | 12.1               | 9.4, 15.5  | 12.8   | 10.7, 15.3 | 20.2               | 17.0, 23.8 | 20.7   | 18.7, 22.9 | 29.3             | 25.9, 33.0 | 26.1   | 22.2, 30.4 |
|               |                                 | TT       | 87.1               | 83.7, 89.9 | 86.7   | 84.2, 88.9 | 78.0               | 74.4, 81.3 | 78.2   | 75.6, 80.5 | 67.6             | 63.9, 71.0 | 71.6   | 67.4, 75.5 |
| <i>ALAD</i>   | rs1800435                       | CC       | 0.9                | 0.4, 2.3   | 0.2    | 0.1, 0.7   | 0.0                | NA         | 0.0    | NA         | 0.2              | 0.0, 1.3   | 0.4    | 0.1, 1.2   |
|               |                                 | CG       | 14.2               | 11.8, 17.1 | 15.8   | 13.8, 18.1 | 3.2                | 1.9, 5.4   | 2.3    | 1.4, 3.6   | 9.3              | 7.3, 11.6  | 7.6    | 5.5, 10.3  |
|               |                                 | GG       | 84.8               | 81.5, 87.6 | 84.0   | 81.6, 86.1 | 96.8               | 94.6, 98.1 | 97.7   | 96.4, 98.6 | 90.6             | 88.4, 92.4 | 92.1   | 89.2, 94.2 |
| <i>B9D2</i>   | rs1800468                       | AA       | 0.4                | 0.1, 1.5   | 0.6    | 0.2, 1.4   | 0.0                | NA         | 0.2    | 0.0, 0.8   | 0.4              | 0.1, 1.7   | 0.1    | 0.0, 0.7   |
|               |                                 | AG       | 14.9               | 12.2, 18.0 | 13.8   | 12.1, 15.6 | 5.6                | 3.6, 8.6   | 5.2    | 3.8, 7.2   | 8.4              | 6.7, 10.4  | 9.3    | 7.7, 11.2  |
|               |                                 | GG       | 84.7               | 81.4, 87.5 | 85.6   | 83.9, 87.2 | 94.4               | 91.4, 96.4 | 94.6   | 92.7, 96.1 | 91.2             | 89.2, 92.9 | 90.6   | 88.6, 92.3 |
|               | rs1800469                       | CC       | 48.6               | 44.4, 52.8 | 46.6   | 43.3, 49.9 | 54.8               | 51.1, 58.4 | 60.8   | 57.0, 64.5 | 33.0             | 29.0, 37.2 | 30.0   | 27.4, 32.8 |
|               |                                 | CT       | 41.3               | 38.0, 44.6 | 42.6   | 38.9, 46.4 | 38.9               | 35.1, 42.8 | 34.2   | 30.4, 38.1 | 45.1             | 42.1, 48.1 | 49.8   | 45.3, 54.3 |
|               |                                 | TT       | 10.1               | 7.5, 13.6  | 10.8   | 9.1, 12.7  | 6.4                | 4.5, 9.0   | 5.0    | 4.0, 6.3   | 21.9             | 18.8, 25.5 | 20.2   | 17.6, 23.0 |
| <i>CAPN10</i> | rs3792267                       | AA       | 7.3                | 5.4, 9.8   | 6.3    | 4.8, 8.2   | 2.4                | 1.5, 3.9   | 2.4    | 1.6, 3.7   | 7.1              | 5.4, 9.2   | 7.6    | 6.0, 9.7   |
|               |                                 | AG       | 36.3               | 33.2, 39.4 | 39.6   | 35.6, 43.7 | 27.9               | 24.1, 32.0 | 27.2   | 23.8, 31.0 | 39.2             | 36.6, 41.8 | 40.8   | 36.3, 45.5 |
|               |                                 | GG       | 56.5               | 52.1, 60.7 | 54.1   | 50.4, 57.8 | 69.7               | 65.4, 73.8 | 70.4   | 66.1, 74.3 | 53.8             | 50.7, 56.8 | 51.5   | 46.3, 56.7 |
| <i>CAT</i>    | rs769214                        | AA       | 44.3               | 38.7, 50.1 | 42.9   | 39.5, 46.4 | 38.0               | 33.8, 42.4 | 32.6   | 29.9, 35.4 | 24.5             | 22.9, 26.2 | 23.4   | 19.6, 27.7 |
|               |                                 | AG       | 45.1               | 40.1, 50.1 | 45.0   | 42.1, 47.9 | 44.7               | 41.4, 48.0 | 50.0   | 47.0, 53.0 | 50.0             | 47.0, 53.0 | 53.0   | 46.9, 59.1 |
|               |                                 | GG       | 10.6               | 7.6, 14.8  | 12.1   | 10.4, 14.0 | 17.4               | 14.4, 20.7 | 17.4   | 14.8, 20.5 | 25.5             | 22.9, 28.3 | 23.6   | 20.7, 26.6 |
| <i>CBS</i>    | 844ins68bp                      | ++       | 0.5                | 0.2, 1.2   | 0.4    | 0.2, 0.9   | 6.5                | 4.6, 8.9   | 7.0    | 5.6, 8.7   | 0.4              | 0.1, 1.2   | 0.4    | 0.1, 1.4   |
|               |                                 | + -      | 14.9               | 12.3, 18.1 | 15.6   | 13.3, 18.2 | 39.8               | 35.1, 44.7 | 37.0   | 34.4, 39.7 | 11.5             | 10.0, 13.2 | 12.3   | 9.5, 15.7  |
|               |                                 | --       | 84.6               | 81.3, 87.3 | 84.0   | 81.3, 86.3 | 53.8               | 48.3, 59.2 | 56.0   | 53.1, 58.9 | 88.2             | 86.6, 89.6 | 87.3   | 84.0, 90.0 |

| Gene symbol   | Variant (dbSNP ID) <sup>a</sup> | Genotype | Non-Hispanic white |            |        |            | Non-Hispanic black |            |        |            | Mexican-American |            |        |            |
|---------------|---------------------------------|----------|--------------------|------------|--------|------------|--------------------|------------|--------|------------|------------------|------------|--------|------------|
|               |                                 |          | Male               |            | Female |            | Male               |            | Female |            | Male             |            | Female |            |
|               |                                 |          | %                  | 95% CI     | %      | 95% CI     | %                  | 95% CI     | %      | 95% CI     | %                | 95% CI     | %      | 95% CI     |
| <i>CCL5</i>   | rs2280788                       | CC       | 94.9               | 93.2, 96.2 | 94.3   | 93.0, 95.4 | 98.6               | 97.1, 99.4 | 98.7   | 97.6, 99.4 | 97.7             | 95.6, 98.8 | 97.1   | 95.1, 98.3 |
|               |                                 | CG       | 5.0                | 3.8, 6.7   | 5.4    | 4.4, 6.7   | 1.4                | 0.6, 2.9   | 1.3    | 0.6, 2.4   | 2.3              | 1.2, 4.4   | 2.9    | 1.7, 4.9   |
|               |                                 | GG       | 0.1                | 0.0, 0.7   | 0.3    | 0.1, 0.9   | 0.0                | NA         | 0.0    | NA         | 0.0              | NA         | 0.0    | NA         |
| <i>CCR2</i>   | rs1799864                       | AA       | 1.6                | 0.8, 3.4   | 0.8    | 0.4, 1.5   | 1.3                | 0.9, 2.1   | 1.9    | 1.2, 3.0   | 4.0              | 2.2, 7.2   | 5.1    | 3.7, 7.1   |
|               |                                 | AG       | 14.6               | 11.8, 17.9 | 18.4   | 14.1, 23.6 | 24.5               | 21.7, 27.5 | 26.6   | 24.1, 29.2 | 33.5             | 30.5, 36.6 | 35.3   | 32.7, 38.0 |
|               |                                 | GG       | 83.8               | 80.5, 86.6 | 80.8   | 75.5, 85.3 | 74.1               | 71.0, 77.0 | 71.5   | 69.0, 73.8 | 62.5             | 59.0, 66.0 | 59.6   | 56.3, 62.7 |
| <i>CXCL12</i> | rs169097                        | CC       | 99.3               | 98.7, 99.6 | 99.6   | 98.7, 99.9 | 68.4               | 63.9, 72.5 | 68.4   | 64.1, 72.3 | 97.5             | 95.9, 98.6 | 98.6   | 97.5, 99.3 |
|               |                                 | CT       | 0.7                | 0.3, 1.3   | 0.4    | 0.1, 1.3   | 28.4               | 24.5, 32.7 | 29.4   | 25.6, 33.5 | 2.5              | 1.4, 4.1   | 1.4    | 0.7, 2.5   |
|               |                                 | TT       | 0.0                | 0.0, 0.3   | 0.0    | NA         | 3.2                | 1.9, 5.3   | 2.2    | 1.6, 3.2   | 0.0              | NA         | 0.0    | NA         |
| <i>CYP1A1</i> | rs2472299                       | CC       | 53.1               | 49.0, 57.1 | 52.6   | 48.8, 56.4 | 37.5               | 33.3, 41.9 | 37.8   | 33.6, 42.2 | 53.7             | 48.4, 58.9 | 54.1   | 50.8, 57.4 |
|               |                                 | CT       | 37.6               | 34.0, 41.3 | 38.2   | 33.6, 43.0 | 47.7               | 43.7, 51.8 | 47.8   | 44.4, 51.2 | 39.5             | 35.8, 43.2 | 38.1   | 34.9, 41.5 |
|               |                                 | TT       | 9.3                | 7.1, 12.2  | 9.2    | 7.7, 11.0  | 14.8               | 12.4, 17.6 | 14.4   | 12.0, 17.1 | 6.9              | 4.6, 10.1  | 7.8    | 6.2, 9.6   |
|               | rs2606345                       | GG       | 12.3               | 9.0, 16.6  | 10.2   | 8.2, 12.7  | 70.8               | 65.6, 75.6 | 70.8   | 65.0, 76.0 | 38.4             | 34.1, 42.9 | 38.4   | 34.1, 43.0 |
|               |                                 | GT       | 46.8               | 42.4, 51.2 | 43.6   | 39.8, 47.4 | 26.8               | 22.2, 31.9 | 26.4   | 21.6, 31.8 | 45.4             | 40.0, 51.0 | 47.7   | 44.0, 51.5 |
|               |                                 | TT       | 41.0               | 36.8, 45.3 | 46.2   | 42.9, 49.5 | 2.4                | 1.6, 3.5   | 2.8    | 2.0, 4.1   | 16.1             | 13.3, 19.5 | 13.9   | 12.1, 16.0 |
| <i>CYP1A2</i> | rs11854147                      | CC       | 48.7               | 44.6, 52.9 | 49.5   | 46.4, 52.6 | 9.2                | 7.6, 11.1  | 8.0    | 5.8, 11.0  | 17.4             | 14.1, 21.3 | 15.4   | 11.7, 20.1 |
|               |                                 | CT       | 39.6               | 36.1, 43.1 | 38.4   | 35.1, 41.9 | 36.9               | 33.4, 40.5 | 40.1   | 37.8, 42.4 | 43.9             | 39.4, 48.5 | 44.9   | 41.6, 48.3 |
|               |                                 | TT       | 11.7               | 9.0, 15.1  | 12.0   | 10.4, 13.9 | 53.9               | 49.8, 57.9 | 51.9   | 48.2, 55.5 | 38.7             | 33.7, 43.9 | 39.6   | 34.6, 44.9 |
|               | rs2069514                       | AA       | 0.2                | 0.0, 1.8   | 0.1    | 0.0, 0.4   | 6.4                | 4.8, 8.4   | 6.2    | 4.9, 8.0   | 11.5             | 8.4, 15.5  | 13.0   | 9.6, 17.3  |
|               |                                 | AG       | 3.7                | 1.9, 7.1   | 2.2    | 1.3, 3.7   | 39.8               | 36.1, 43.7 | 40.0   | 35.5, 44.7 | 42.4             | 38.2, 46.6 | 43.5   | 38.5, 48.6 |
|               |                                 | GG       | 96.1               | 92.6, 97.9 | 97.8   | 96.3, 98.7 | 53.8               | 50.7, 56.8 | 53.7   | 49.8, 57.7 | 46.1             | 40.5, 51.9 | 43.6   | 38.4, 48.8 |
|               | rs4886406                       | GG       | 7.7                | 5.8, 10.3  | 9.0    | 7.8, 10.2  | 14.1               | 12.0, 16.6 | 13.8   | 11.5, 16.4 | 6.6              | 4.8, 9.0   | 7.9    | 6.2, 10.0  |
|               |                                 | GT       | 39.6               | 36.5, 42.8 | 38.3   | 34.4, 42.3 | 49.4               | 44.5, 54.3 | 48.4   | 44.7, 52.1 | 40.2             | 36.4, 44.2 | 37.0   | 34.4, 39.6 |
|               |                                 | TT       | 52.7               | 48.6, 56.7 | 52.8   | 49.4, 56.1 | 36.5               | 31.5, 41.9 | 37.8   | 33.6, 42.3 | 53.2             | 48.0, 58.3 | 55.1   | 52.2, 58.0 |
| <i>CYP1B1</i> | rs1056836                       | CC       | 31.6               | 27.6, 35.8 | 29.9   | 26.9, 33.1 | 5.2                | 3.8, 7.2   | 6.5    | 4.6, 9.1   | 55.9             | 51.5, 60.2 | 54.6   | 49.5, 59.5 |
|               |                                 | CG       | 47.3               | 43.8, 50.9 | 48.9   | 45.2, 52.7 | 39.1               | 35.5, 42.8 | 37.4   | 34.3, 40.7 | 36.0             | 32.0, 40.2 | 36.9   | 32.5, 41.5 |



| Gene symbol    | Variant (dbSNP ID) <sup>a</sup> | Genotype | Non-Hispanic white |             |        |            | Non-Hispanic black |             |        |            | Mexican-American |            |        |            |
|----------------|---------------------------------|----------|--------------------|-------------|--------|------------|--------------------|-------------|--------|------------|------------------|------------|--------|------------|
|                |                                 |          | Male               |             | Female |            | Male               |             | Female |            | Male             |            | Female |            |
|                |                                 |          | %                  | 95% CI      | %      | 95% CI     | %                  | 95% CI      | %      | 95% CI     | %                | 95% CI     | %      | 95% CI     |
|                | rs1056837                       | GG       | 21.1               | 17.2, 25.6  | 21.2   | 18.2, 24.4 | 55.7               | 51.6, 59.7  | 56.1   | 52.6, 59.5 | 8.1              | 6.0, 10.9  | 8.6    | 6.9, 10.6  |
|                |                                 | CC       | 31.5               | 28.1, 35.1  | 30.6   | 27.5, 33.9 | 5.9                | 4.2, 8.1    | 8.4    | 6.4, 10.9  | 56.1             | 51.6, 60.5 | 55.8   | 51.1, 60.4 |
|                |                                 | CT       | 47.9               | 44.3, 51.5  | 48.0   | 44.5, 51.5 | 42.6               | 38.7, 46.5  | 38.1   | 35.0, 41.2 | 36.0             | 32.2, 40.0 | 34.9   | 30.5, 39.6 |
|                |                                 | TT       | 20.6               | 17.1, 24.7  | 21.4   | 18.4, 24.7 | 51.6               | 47.2, 55.9  | 53.6   | 50.2, 56.8 | 7.9              | 5.7, 10.9  | 9.3    | 6.9, 12.4  |
|                | rs162557                        | CC       | 61.2               | 57.2, 65.1  | 57.2   | 54.0, 60.4 | 61.1               | 57.5, 64.6  | 61.3   | 56.8, 65.6 | 76.6             | 72.4, 80.4 | 74.6   | 70.2, 78.5 |
|                |                                 | CT       | 33.1               | 29.9, 36.4  | 37.2   | 34.3, 40.3 | 35.2               | 32.1, 38.4  | 33.4   | 29.5, 37.7 | 21.7             | 18.0, 25.8 | 23.7   | 20.4, 27.3 |
|                |                                 | TT       | 5.7                | 3.8, 8.4    | 5.5    | 3.6, 8.3   | 3.7                | 2.4, 5.5    | 5.2    | 3.8, 7.2   | 1.7              | 1.0, 2.8   | 1.8    | 1.0, 3.0   |
| <i>CYP2A6</i>  | rs1801272                       | AA       | 0.2                | 0.0, 0.7    | 0.0    | NA         | 0.0                | NA          | 0.0    | NA         | 0.1              | 0.0, 0.6   | 0.0    | NA         |
|                |                                 | AT       | 6.8                | 5.0, 9.1    | 6.0    | 4.8, 7.5   | 1.2                | 0.6, 2.5    | 1.2    | 0.6, 2.2   | 3.9              | 2.8, 5.3   | 4.0    | 2.8, 5.6   |
|                |                                 | TT       | 93.1               | 90.7, 94.8  | 94.0   | 92.5, 95.2 | 98.8               | 97.5, 99.4  | 98.8   | 97.8, 99.4 | 96.1             | 94.6, 97.2 | 96.0   | 94.4, 97.2 |
| <i>CYP2C19</i> | rs4986893                       | AA       | 0.0                | NA          | 0.0    | NA         | 0.0                | NA          | 0.0    | NA         | 0.0              | NA         | 0.0    | NA         |
|                |                                 | AG       | 0.2                | 0.0, 1.0    | 0.2    | 0.1, 0.5   | 0.2                | 0.0, 1.0    | 0.4    | 0.1, 1.2   | 0.2              | 0.1, 0.4   | 0.2    | 0.1, 1.1   |
|                |                                 | GG       | 99.8               | 99.0, 100.0 | 99.8   | 99.5, 99.9 | 99.8               | 99.0, 100.0 | 99.6   | 98.8, 99.9 | 99.8             | 99.6, 99.9 | 99.8   | 98.9, 99.9 |
|                | rs4986894                       | CC       | 1.3                | 0.6, 2.4    | 2.5    | 1.7, 3.6   | 3.2                | 2.3, 4.6    | 4.2    | 3.0, 5.9   | 1.0              | 0.4, 2.4   | 1.6    | 0.9, 3.0   |
|                |                                 | CT       | 22.4               | 19.0, 26.3  | 24.8   | 22.0, 27.8 | 27.9               | 23.8, 32.3  | 30.2   | 26.6, 34.1 | 18.1             | 14.8, 21.8 | 20.9   | 17.0, 25.5 |
|                |                                 | TT       | 76.3               | 72.3, 79.9  | 72.8   | 69.5, 75.8 | 68.9               | 64.5, 73.0  | 65.6   | 61.9, 69.0 | 81.0             | 76.7, 84.6 | 77.4   | 72.7, 81.5 |
| <i>CYP2C9</i>  | rs1057910                       | AA       | 88.0               | 85.2, 90.3  | 86.2   | 84.3, 87.8 | 97.3               | 95.4, 98.5  | 98.4   | 97.3, 99.1 | 91.7             | 88.8, 93.9 | 93.1   | 90.8, 94.8 |
|                |                                 | AC       | 11.6               | 9.4, 14.2   | 13.0   | 11.2, 15.1 | 2.7                | 1.5, 4.6    | 1.5    | 0.9, 2.6   | 8.1              | 6.1, 10.8  | 6.9    | 5.2, 9.2   |
|                |                                 | CC       | 0.4                | 0.2, 1.1    | 0.8    | 0.5, 1.2   | 0.0                | NA          | 0.1    | 0.0, 0.6   | 0.2              | 0.1, 0.7   | 0.0    | NA         |
| <i>CYP2E1</i>  | rs2031920*                      | CC       | 95.1               | 93.0, 96.6  | 96.1   | 94.7, 97.2 | 98.5               | 97.2, 99.2  | 98.5   | 97.4, 99.1 | 79.4             | 76.6, 82.0 | 80.0   | 77.1, 82.7 |
|                |                                 | CT       | 4.6                | 3.1, 6.9    | 3.9    | 2.8, 5.3   | 1.5                | 0.8, 2.8    | 1.5    | 0.9, 2.6   | 19.0             | 16.3, 22.0 | 19.5   | 16.7, 22.7 |
|                |                                 | TT       | 0.2                | 0.1, 0.8    | 0.0    | NA         | 0.0                | NA          | 0.0    | NA         | 1.6              | 0.8, 3.0   | 0.4    | 0.2, 1.1   |
| <i>CYP3A4</i>  | rs2740574                       | AA       | 91.9               | 89.1, 94.1  | 92.8   | 91.4, 94.0 | 13.5               | 11.0, 16.5  | 13.9   | 11.3, 16.9 | 85.7             | 83.2, 87.9 | 85.1   | 81.4, 88.1 |
|                |                                 | AG       | 7.5                | 5.3, 10.4   | 6.8    | 5.6, 8.2   | 44.4               | 40.4, 48.5  | 44.5   | 40.2, 49.0 | 13.7             | 11.4, 16.3 | 14.0   | 11.4, 17.0 |
|                |                                 | GG       | 0.6                | 0.2, 2.2    | 0.4    | 0.1, 1.8   | 42.1               | 38.2, 46.0  | 41.6   | 37.8, 45.4 | 0.6              | 0.3, 1.3   | 0.9    | 0.4, 2.2   |
| <i>F2</i>      | rs1799963                       | AA       | 0.0                | NA          | 0.0    | NA         | 0.0                | NA          | 0.0    | NA         | 0.0              | NA         | 0.0    | NA         |

| Gene symbol   | Variant (dbSNP ID) <sup>a</sup> | Genotype | Non-Hispanic white |            |        |            | Non-Hispanic black |            |        |            | Mexican-American |            |        |            |
|---------------|---------------------------------|----------|--------------------|------------|--------|------------|--------------------|------------|--------|------------|------------------|------------|--------|------------|
|               |                                 |          | Male               |            | Female |            | Male               |            | Female |            | Male             |            | Female |            |
|               |                                 |          | %                  | 95% CI     | %      | 95% CI     | %                  | 95% CI     | %      | 95% CI     | %                | 95% CI     | %      | 95% CI     |
| <i>F5</i>     | rs6025                          | AG       | 2.2                | 1.4, 3.5   | 2.3    | 1.4, 3.8   | 0.3                | 0.1, 1.2   | 0.7    | 0.4, 1.4   | 1.6              | 1.0, 2.4   | 2.9    | 1.7, 5.0   |
|               |                                 | GG       | 97.8               | 96.5, 98.6 | 97.7   | 96.2, 98.6 | 99.7               | 98.8, 99.9 | 99.3   | 98.6, 99.6 | 98.4             | 97.6, 99.0 | 97.1   | 95.0, 98.3 |
|               |                                 | AA       | 0.0                | 0.0, 0.3   | 0.0    | NA         | 0.0                | NA         | 0.0    | NA         | 0.0              | NA         | 0.1    | 0.0, 0.7   |
|               |                                 | AG       | 5.3                | 3.6, 7.6   | 5.1    | 4.2, 6.1   | 1.2                | 0.8, 2.0   | 1.3    | 0.6, 2.6   | 2.6              | 1.6, 4.3   | 1.3    | 0.7, 2.4   |
|               |                                 | GG       | 94.7               | 92.4, 96.3 | 94.9   | 93.9, 95.8 | 98.8               | 98.0, 99.2 | 98.7   | 97.4, 99.4 | 97.4             | 95.7, 98.4 | 98.6   | 97.6, 99.2 |
| <i>FAM82A</i> | rs163086                        | CC       | 58.8               | 54.7, 62.8 | 60.8   | 57.3, 64.1 | 64.5               | 61.0, 67.8 | 65.5   | 61.0, 69.7 | 72.2             | 67.1, 76.8 | 74.7   | 71.9, 77.3 |
|               |                                 | CT       | 36.0               | 32.1, 40.2 | 33.5   | 30.8, 36.2 | 32.0               | 29.0, 35.2 | 31.4   | 27.9, 35.3 | 25.3             | 21.1, 30.0 | 22.8   | 19.9, 25.9 |
|               |                                 | TT       | 5.1                | 3.5, 7.5   | 5.7    | 3.9, 8.4   | 3.5                | 2.3, 5.3   | 3.1    | 2.0, 4.7   | 2.5              | 1.9, 3.2   | 2.5    | 1.6, 4.0   |
| <i>FCGR2A</i> | rs1801274                       | AA       | 24.1               | 20.7, 27.8 | 25.7   | 23.3, 28.3 | 21.6               | 19.3, 24.1 | 21.9   | 19.2, 24.8 | 24.0             | 21.5, 26.7 | 23.4   | 21.0, 25.9 |
|               |                                 | AG       | 47.9               | 44.4, 51.5 | 49.8   | 47.1, 52.6 | 50.3               | 47.1, 53.6 | 52.1   | 49.2, 55.0 | 49.8             | 45.8, 53.7 | 49.8   | 46.5, 53.1 |
|               |                                 | GG       | 28.0               | 24.3, 32.0 | 24.5   | 21.9, 27.2 | 28.0               | 24.8, 31.5 | 26.0   | 23.8, 28.3 | 26.2             | 23.1, 29.6 | 26.8   | 23.2, 30.7 |
| <i>FGB</i>    | rs1800790                       | AA       | 3.2                | 2.4, 4.3   | 3.6    | 2.3, 5.7   | 0.6                | 0.2, 2.0   | 0.7    | 0.3, 1.6   | 2.7              | 2.0, 3.8   | 2.2    | 1.5, 3.4   |
|               |                                 | AG       | 32.5               | 29.7, 35.5 | 31.4   | 29.4, 33.5 | 10.3               | 8.4, 12.7  | 9.4    | 6.9, 12.7  | 25.5             | 23.4, 27.7 | 24.3   | 20.6, 28.4 |
|               |                                 | GG       | 64.3               | 61.2, 67.2 | 65.0   | 62.5, 67.4 | 89.1               | 86.9, 91.0 | 89.9   | 86.6, 92.5 | 71.7             | 69.1, 74.2 | 73.5   | 69.5, 77.1 |
| <i>IL10</i>   | rs1800871                       | CC       | 58.9               | 54.4, 63.3 | 57.9   | 55.2, 60.5 | 35.7               | 31.6, 40.1 | 36.8   | 33.3, 40.5 | 38.6             | 34.5, 42.9 | 39.8   | 35.4, 44.5 |
|               |                                 | CT       | 34.1               | 30.4, 38.1 | 35.6   | 32.6, 38.6 | 49.1               | 44.7, 53.5 | 47.3   | 43.8, 50.7 | 46.9             | 44.6, 49.3 | 43.8   | 40.3, 47.3 |
|               |                                 | TT       | 6.9                | 5.1, 9.3   | 6.6    | 4.5, 9.4   | 15.1               | 12.8, 17.8 | 15.9   | 13.7, 18.5 | 14.5             | 10.6, 19.4 | 16.4   | 14.0, 19.0 |
|               | rs1800872                       | AA       | 7.1                | 5.1, 9.6   | 6.7    | 4.6, 9.6   | 14.3               | 12.1, 17.0 | 15.6   | 13.4, 18.1 | 14.1             | 10.4, 18.9 | 16.1   | 13.7, 18.9 |
|               |                                 | AC       | 34.4               | 30.6, 38.4 | 35.5   | 32.4, 38.7 | 49.9               | 45.2, 54.6 | 47.3   | 43.6, 51.1 | 47.3             | 44.6, 50.1 | 43.9   | 40.1, 47.7 |
|               |                                 | CC       | 58.6               | 54.1, 62.9 | 57.8   | 55.1, 60.5 | 35.7               | 31.6, 40.1 | 37.1   | 33.5, 40.8 | 38.5             | 34.2, 43.0 | 40.0   | 35.6, 44.6 |
|               | rs1800896                       | AA       | 29.2               | 25.4, 33.4 | 28.0   | 24.4, 32.0 | 41.0               | 36.8, 45.4 | 40.2   | 36.4, 44.1 | 46.2             | 40.4, 52.1 | 51.2   | 47.1, 55.3 |
|               |                                 | AG       | 49.4               | 45.1, 53.7 | 48.6   | 44.8, 52.5 | 46.5               | 42.2, 50.8 | 48.5   | 44.4, 52.6 | 44.3             | 38.5, 50.4 | 39.0   | 35.1, 43.0 |
|               |                                 | GG       | 21.4               | 18.6, 24.5 | 23.3   | 20.4, 26.5 | 12.5               | 10.4, 15.1 | 11.3   | 9.3, 13.7  | 9.4              | 7.1, 12.4  | 9.8    | 7.9, 12.1  |
| <i>IL1B</i>   | rs1143623                       | CC       | 9.3                | 7.4, 11.7  | 8.6    | 6.3, 11.7  | 1.2                | 0.5, 2.9   | 1.0    | 0.5, 1.9   | 21.6             | 17.9, 25.7 | 17.1   | 14.6, 19.9 |
|               |                                 | CG       | 39.1               | 35.1, 43.2 | 39.0   | 35.9, 42.3 | 20.1               | 18.0, 22.4 | 20.5   | 17.8, 23.4 | 46.0             | 40.8, 51.3 | 48.3   | 44.7, 51.9 |

| Gene symbol  | Variant (dbSNP ID) <sup>a</sup> | Genotype | Non-Hispanic white |            |        |            | Non-Hispanic black |            |        |            | Mexican-American |            |        |            |
|--------------|---------------------------------|----------|--------------------|------------|--------|------------|--------------------|------------|--------|------------|------------------|------------|--------|------------|
|              |                                 |          | Male               |            | Female |            | Male               |            | Female |            | Male             |            | Female |            |
|              |                                 |          | %                  | 95% CI     | %      | 95% CI     | %                  | 95% CI     | %      | 95% CI     | %                | 95% CI     | %      | 95% CI     |
|              |                                 | GG       | 51.6               | 46.9, 56.3 | 52.3   | 48.4, 56.2 | 78.7               | 76.2, 80.9 | 78.6   | 75.3, 81.5 | 32.5             | 27.7, 37.7 | 34.6   | 31.8, 37.5 |
| <i>IL4</i>   | rs2243248*                      | GG       | 0.5                | 0.2, 1.3   | 0.4    | 0.1, 1.4   | 2.5                | 1.5, 4.1   | 2.5    | 1.6, 3.9   | 1.4              | 0.9, 2.2   | 2.4    | 1.4, 4.1   |
|              |                                 | GT       | 16.0               | 13.6, 18.7 | 12.3   | 10.9, 14.0 | 26.7               | 23.8, 29.8 | 26.4   | 23.3, 29.7 | 21.2             | 18.2, 24.6 | 19.3   | 15.6, 23.7 |
|              |                                 | TT       | 83.5               | 81.0, 85.8 | 87.2   | 85.6, 88.7 | 70.8               | 67.8, 73.7 | 71.1   | 67.7, 74.3 | 77.3             | 73.6, 80.7 | 78.3   | 73.1, 82.7 |
|              | rs2243250                       | CC       | 71.4               | 68.3, 74.4 | 70.2   | 67.4, 72.8 | 13.4               | 10.4, 16.9 | 14.8   | 12.5, 17.3 | 32.6             | 27.4, 38.2 | 36.1   | 33.9, 38.3 |
|              |                                 | CT       | 25.8               | 22.9, 29.0 | 27.0   | 24.5, 29.6 | 43.6               | 39.7, 47.6 | 44.0   | 40.3, 47.8 | 49.0             | 43.1, 54.9 | 44.6   | 42.1, 47.2 |
|              |                                 | TT       | 2.7                | 1.6, 4.7   | 2.9    | 1.9, 4.2   | 43.0               | 38.3, 47.9 | 41.2   | 37.5, 45.0 | 18.4             | 16.2, 20.9 | 19.3   | 17.4, 21.4 |
|              | rs2243270                       | AA       | 70.8               | 67.5, 73.8 | 69.1   | 66.5, 71.6 | 13.4               | 11.1, 16.0 | 15.5   | 13.6, 17.7 | 33.5             | 28.5, 38.9 | 36.5   | 34.1, 39.0 |
|              |                                 | AG       | 26.5               | 23.4, 29.9 | 28.3   | 25.9, 30.8 | 43.3               | 39.0, 47.7 | 43.7   | 40.4, 47.1 | 48.5             | 43.7, 53.3 | 44.6   | 41.9, 47.2 |
|              |                                 | GG       | 2.7                | 1.5, 4.8   | 2.6    | 1.8, 3.8   | 43.3               | 38.7, 48.1 | 40.8   | 37.5, 44.1 | 18.0             | 15.5, 20.9 | 18.9   | 16.6, 21.5 |
| <i>IL4R</i>  | rs1801275                       | AA       | 63.1               | 59.3, 66.6 | 62.4   | 59.5, 65.1 | 11.6               | 9.5, 14.2  | 14.4   | 12.0, 17.2 | 50.4             | 46.9, 53.8 | 52.6   | 47.5, 57.6 |
|              |                                 | AG       | 32.6               | 29.2, 36.1 | 33.5   | 31.2, 35.9 | 38.9               | 34.3, 43.7 | 40.1   | 37.0, 43.3 | 40.8             | 37.9, 43.8 | 38.8   | 35.1, 42.7 |
|              |                                 | GG       | 4.4                | 3.4, 5.6   | 4.1    | 3.0, 5.5   | 49.5               | 44.7, 54.3 | 45.5   | 41.8, 49.3 | 8.8              | 6.4, 12.0  | 8.6    | 6.6, 11.2  |
|              | rs1805015                       | CC       | 2.0                | 1.2, 3.3   | 2.7    | 1.7, 4.2   | 14.8               | 12.5, 17.4 | 11.0   | 8.8, 13.7  | 2.5              | 1.8, 3.3   | 3.3    | 1.7, 6.1   |
|              |                                 | CT       | 27.7               | 24.8, 30.9 | 25.7   | 23.7, 27.7 | 49.7               | 45.2, 54.2 | 46.6   | 42.2, 51.0 | 26.6             | 23.7, 29.7 | 24.7   | 21.5, 28.3 |
|              |                                 | TT       | 70.2               | 67.1, 73.2 | 71.6   | 68.9, 74.2 | 35.5               | 31.3, 39.9 | 42.4   | 38.4, 46.5 | 70.9             | 67.4, 74.2 | 72.0   | 67.7, 76.0 |
| <i>ITGA2</i> | rs1126643                       | CC       | 35.4               | 32.2, 38.7 | 34.0   | 31.6, 36.5 | 46.2               | 41.3, 51.2 | 50.4   | 47.2, 53.7 | 31.3             | 28.2, 34.6 | 29.3   | 27.0, 31.6 |
|              |                                 | CT       | 47.4               | 44.5, 50.3 | 49.2   | 46.1, 52.4 | 46.7               | 42.5, 51.0 | 41.2   | 39.1, 43.3 | 47.8             | 43.7, 51.9 | 52.6   | 50.1, 55.1 |
|              |                                 | TT       | 17.2               | 14.6, 20.2 | 16.8   | 13.6, 20.6 | 7.1                | 4.9, 10.0  | 8.4    | 6.8, 10.3  | 20.9             | 17.7, 24.5 | 18.2   | 16.3, 20.1 |
| <i>ITGB3</i> | rs5918                          | CC       | 3.2                | 2.1, 4.9   | 2.2    | 1.3, 3.6   | 1.0                | 0.5, 2.0   | 1.1    | 0.6, 2.1   | 1.4              | 0.7, 2.7   | 1.1    | 0.5, 2.4   |
|              |                                 | CT       | 26.2               | 22.7, 30.0 | 28.2   | 25.8, 30.7 | 17.1               | 15.2, 19.2 | 18.7   | 16.4, 21.2 | 17.5             | 14.9, 20.5 | 16.0   | 12.8, 19.9 |
|              |                                 | TT       | 70.6               | 66.8, 74.1 | 69.7   | 66.9, 72.3 | 81.9               | 79.7, 83.8 | 80.2   | 77.9, 82.3 | 81.1             | 78.1, 83.7 | 82.9   | 78.7, 86.3 |
| <i>MBL2</i>  | rs11003125                      | CC       | 40.4               | 37.9, 42.9 | 41.3   | 38.1, 44.7 | 74.6               | 70.9, 77.9 | 77.5   | 74.3, 80.4 | 24.1             | 20.2, 28.4 | 25.9   | 22.9, 29.2 |
|              |                                 | CG       | 47.7               | 45.2, 50.3 | 43.5   | 39.1, 48.0 | 23.4               | 19.9, 27.2 | 20.8   | 17.7, 24.3 | 48.6             | 46.0, 51.1 | 47.7   | 44.1, 51.3 |
|              |                                 | GG       | 11.9               | 9.8, 14.3  | 15.2   | 12.3, 18.6 | 2.1                | 1.2, 3.4   | 1.7    | 1.1, 2.7   | 27.4             | 24.8, 30.1 | 26.4   | 24.2, 28.7 |
|              | rs1800450                       | AA       | 2.7                | 1.9, 3.7   | 3.0    | 2.1, 4.3   | 0.3                | 0.1, 1.1   | 0.4    | 0.1, 1.0   | 2.4              | 1.4, 4.1   | 1.7    | 0.9, 3.0   |

| Gene symbol | Variant (dbSNP ID) <sup>a</sup> | Genotype  | Non-Hispanic white |            |            |            | Non-Hispanic black |            |            |            | Mexican-American |            |            |            |
|-------------|---------------------------------|-----------|--------------------|------------|------------|------------|--------------------|------------|------------|------------|------------------|------------|------------|------------|
|             |                                 |           | Male               |            | Female     |            | Male               |            | Female     |            | Male             |            | Female     |            |
|             |                                 |           | %                  | 95% CI     | %          | 95% CI     | %                  | 95% CI     | %          | 95% CI     | %                | 95% CI     | %          | 95% CI     |
|             | rs1800451                       | AG        | 23.4               | 19.8, 27.5 | 23.6       | 21.4, 25.9 | 8.4                | 6.7, 10.5  | 6.5        | 4.8, 8.8   | 24.9             | 22.4, 27.6 | 25.4       | 21.6, 29.7 |
|             |                                 | GG        | 74.0               | 69.9, 77.7 | 73.4       | 70.8, 75.9 | 91.3               | 89.1, 93.0 | 93.1       | 90.7, 95.0 | 72.7             | 69.7, 75.6 | 72.9       | 68.2, 77.2 |
|             |                                 | AA        | 0.1                | 0.0, 0.6   | 0.1        | 0.0, 0.4   | 6.4                | 4.5, 9.2   | 5.8        | 4.2, 7.8   | 0.0              | NA         | 0.0        | NA         |
|             | rs5030737                       | AG        | 3.2                | 2.2, 4.7   | 4.3        | 3.1, 5.9   | 32.0               | 28.6, 35.7 | 36.4       | 33.8, 39.1 | 4.8              | 3.4, 6.7   | 5.4        | 4.1, 6.9   |
|             |                                 | GG        | 96.7               | 95.3, 97.7 | 95.6       | 94.0, 96.8 | 61.5               | 57.5, 65.4 | 57.8       | 54.8, 60.8 | 95.2             | 93.3, 96.6 | 94.6       | 93.1, 95.9 |
|             |                                 | CC        | 86.2               | 82.6, 89.1 | 85.6       | 83.8, 87.3 | 98.3               | 97.3, 99.0 | 97.3       | 95.9, 98.2 | 94.9             | 92.9, 96.3 | 93.8       | 91.9, 95.3 |
|             | rs7096206                       | CT        | 13.6               | 10.7, 17.1 | 13.1       | 11.2, 15.3 | 1.7                | 1.0, 2.7   | 2.7        | 1.8, 4.1   | 5.0              | 3.6, 6.8   | 6.0        | 4.5, 7.9   |
|             |                                 | TT        | 0.2                | 0.0, 1.2   | 1.3        | 0.7, 2.4   | 0.0                | NA         | 0.0        | NA         | 0.2              | 0.1, 0.3   | 0.2        | 0.0, 0.7   |
|             |                                 | CC        | 4.3                | 2.5, 7.0   | 6.1        | 4.7, 8.0   | 1.9                | 1.1, 3.2   | 2.5        | 1.7, 3.7   | 2.4              | 1.5, 3.9   | 2.1        | 1.2, 3.6   |
|             |                                 | CG        | 35.1               | 30.1, 40.4 | 33.7       | 29.6, 38.0 | 24.5               | 21.2, 28.2 | 26.9       | 23.5, 30.6 | 16.1             | 13.5, 19.1 | 20.5       | 16.9, 24.8 |
|             |                                 | GG        | 60.7               | 56.3, 64.9 | 60.2       | 55.8, 64.5 | 73.5               | 69.8, 77.0 | 70.6       | 66.7, 74.2 | 81.5             | 77.9, 84.6 | 77.4       | 72.7, 81.4 |
|             | <i>MTHFR</i>                    | rs1801131 | AA                 | 48.3       | 42.8, 53.8 | 48.2       | 44.1, 52.3         | 66.3       | 63.3, 69.2 | 68.7       | 66.1, 71.1       | 66.0       | 60.3, 71.2 | 65.9       |
| AC          |                                 |           | 40.7               | 36.2, 45.3 | 41.9       | 38.3, 45.5 | 30.0               | 27.5, 32.7 | 28.2       | 25.7, 30.8 | 31.3             | 26.8, 36.3 | 29.6       | 26.5, 32.9 |
| rs1801133   |                                 | CC        | 11.0               | 7.9, 15.1  | 9.9        | 7.7, 12.7  | 3.6                | 2.6, 5.0   | 3.2        | 2.3, 4.4   | 2.7              | 1.8, 4.0   | 4.4        | 2.5, 7.9   |
|             |                                 | CC        | 48.0               | 42.4, 53.6 | 44.8       | 40.7, 49.1 | 77.3               | 74.0, 80.3 | 78.4       | 76.3, 80.4 | 29.3             | 25.7, 33.2 | 32.2       | 28.7, 35.9 |
| rs2066470   |                                 | CT        | 40.8               | 35.7, 46.2 | 43.4       | 39.9, 46.9 | 21.5               | 18.4, 24.9 | 20.5       | 18.3, 22.8 | 50.9             | 47.2, 54.6 | 47.8       | 43.9, 51.8 |
|             |                                 | TT        | 11.2               | 8.6, 14.3  | 11.8       | 9.8, 14.1  | 1.2                | 0.6, 2.4   | 1.1        | 0.6, 2.0   | 19.8             | 15.1, 25.5 | 20.0       | 18.0, 22.2 |
|             |                                 | CC        | 81.3               | 77.0, 85.0 | 82.5       | 79.6, 85.1 | 84.9               | 81.8, 87.6 | 82.3       | 79.0, 85.2 | 87.7             | 84.7, 90.1 | 87.2       | 83.4, 90.3 |
|             |                                 | CT        | 17.4               | 13.9, 21.4 | 16.7       | 14.2, 19.5 | 14.6               | 12.0, 17.7 | 16.4       | 13.7, 19.5 | 11.8             | 9.5, 14.6  | 12.4       | 9.3, 16.3  |
|             | TT                              | 1.3       | 0.7, 2.4           | 0.8        | 0.3, 1.9   | 0.5        | 0.2, 1.2           | 1.2        | 0.6, 2.7   | 0.6        | 0.2, 1.9         | 0.4        | 0.1, 1.4   |            |
| <i>MTRR</i> | rs1801394                       | AA        | 22.3               | 19.9, 24.9 | 23.0       | 21.0, 25.1 | 50.3               | 45.8, 54.9 | 51.0       | 48.0, 54.0 | 55.5             | 49.6, 61.3 | 54.4       | 51.7, 57.1 |
|             |                                 | AG        | 51.4               | 47.9, 54.9 | 46.9       | 43.4, 50.5 | 41.4               | 37.8, 45.1 | 40.9       | 38.5, 43.4 | 37.6             | 32.0, 43.5 | 38.2       | 36.0, 40.5 |
|             |                                 | GG        | 26.3               | 23.3, 29.6 | 30.1       | 27.2, 33.1 | 8.3                | 6.5, 10.4  | 8.1        | 6.4, 10.1  | 6.9              | 5.4, 8.8   | 7.4        | 5.7, 9.5   |
| <i>NAT2</i> | rs1041983                       | CC        | 42.0               | 39.4, 44.7 | 40.8       | 37.6, 44.1 | 31.1               | 27.0, 35.5 | 30.6       | 28.7, 32.6 | 45.6             | 41.6, 49.8 | 47.9       | 44.1, 51.6 |
|             |                                 | CT        | 46.4               | 43.7, 49.1 | 46.2       | 43.1, 49.4 | 45.0               | 41.3, 48.9 | 47.1       | 44.4, 49.8 | 44.2             | 41.1, 47.3 | 41.3       | 37.7, 45.1 |
|             |                                 | TT        | 11.6               | 9.7, 13.7  | 12.9       | 11.4, 14.7 | 23.9               | 20.6, 27.5 | 22.3       | 20.2, 24.5 | 10.2             | 8.0, 12.8  | 10.8       | 8.4, 13.8  |
|             | rs1208                          | AA        | 33.4               | 30.5, 36.4 | 35.6       | 33.7, 37.6 | 39.9               | 36.3, 43.7 | 38.7       | 36.4, 41.1 | 41.4             | 37.2, 45.6 | 41.1       | 37.8, 44.5 |
|             |                                 | AG        | 50.0               | 46.7, 53.2 | 47.8       | 44.9, 50.7 | 44.1               | 39.9, 48.3 | 45.7       | 43.3, 48.0 | 46.7             | 43.1, 50.4 | 45.6       | 42.7, 48.6 |

| Gene symbol | Variant (dbSNP ID) <sup>a</sup> | Genotype  | Non-Hispanic white |             |          |             | Non-Hispanic black |            |           |            | Mexican-American |            |          |            |          |
|-------------|---------------------------------|-----------|--------------------|-------------|----------|-------------|--------------------|------------|-----------|------------|------------------|------------|----------|------------|----------|
|             |                                 |           | Male               |             | Female   |             | Male               |            | Female    |            | Male             |            | Female   |            |          |
|             |                                 |           | %                  | 95% CI      | %        | 95% CI      | %                  | 95% CI     | %         | 95% CI     | %                | 95% CI     | %        | 95% CI     |          |
|             | rs1799930                       | GG        | 16.6               | 14.8, 18.7  | 16.6     | 14.2, 19.4  | 16.0               | 13.5, 18.9 | 15.6      | 14.0, 17.4 | 11.9             | 9.1, 15.5  | 13.3     | 11.6, 15.2 |          |
|             |                                 | AA        | 9.2                | 7.6, 11.0   | 11.0     | 9.4, 12.9   | 9.6                | 7.5, 12.2  | 7.9       | 6.5, 9.6   | 3.1              | 1.8, 5.2   | 3.4      | 2.0, 5.7   |          |
|             |                                 | AG        | 45.1               | 42.4, 47.8  | 43.7     | 40.7, 46.7  | 38.2               | 33.5, 43.2 | 38.9      | 35.8, 42.1 | 30.1             | 26.7, 33.9 | 28.8     | 24.8, 33.1 |          |
|             | rs1801279                       | GG        | 45.7               | 43.0, 48.5  | 45.3     | 42.0, 48.6  | 52.2               | 46.6, 57.7 | 53.2      | 50.4, 55.9 | 66.8             | 63.2, 70.2 | 67.8     | 62.7, 72.6 |          |
|             |                                 | AA        | 0.0                | NA          | 0.0      | NA          | 0.3                | 0.1, 1.6   | 0.4       | 0.1, 1.2   | 0.0              | 0.0, 0.1   | 0.0      | NA         |          |
|             |                                 | AG        | 0.1                | 0.0, 0.6    | 0.1      | 0.0, 0.3    | 14.4               | 12.6, 16.4 | 15.3      | 12.8, 18.3 | 1.1              | 0.5, 2.4   | 0.9      | 0.4, 2.0   |          |
|             | rs1801280                       | GG        | 99.9               | 99.4, 100.0 | 99.9     | 99.7, 100.0 | 85.3               | 83.4, 87.1 | 84.3      | 81.4, 86.7 | 98.9             | 97.6, 99.5 | 99.1     | 98.0, 99.6 |          |
|             |                                 | CC        | 17.5               | 15.6, 19.6  | 17.4     | 15.0, 20.1  | 10.2               | 8.7, 11.9  | 8.2       | 6.5, 10.4  | 9.7              | 7.0, 13.2  | 10.6     | 8.6, 13.1  |          |
|             |                                 | CT        | 50.0               | 46.8, 53.3  | 48.7     | 45.6, 51.8  | 40.0               | 36.2, 44.0 | 40.4      | 37.6, 43.3 | 43.8             | 41.1, 46.5 | 45.1     | 40.9, 49.4 |          |
|             |                                 | TT        | 32.5               | 29.5, 35.6  | 33.9     | 31.9, 36.0  | 49.8               | 46.0, 53.5 | 51.3      | 48.4, 54.2 | 46.5             | 42.2, 50.9 | 44.3     | 39.7, 48.9 |          |
|             | <i>NOS2A</i>                    | rs1800482 | CC                 | 0.0         | NA       | 0.0         | NA                 | 0.6        | 0.2, 1.9  | 0.4        | 0.2, 0.9         | 0.0        | NA       | 0.2        | 0.0, 1.4 |
|             |                                 |           | CG                 | 0.2         | 0.1, 0.6 | 0.0         | 0.0, 0.2           | 12.7       | 9.9, 16.3 | 10.5       | 8.1, 13.5        | 0.4        | 0.2, 1.1 | 0.3        | 0.1, 1.5 |
| GG          |                                 |           | 99.8               | 99.4, 99.9  | 100.0    | 99.8, 100.0 | 86.6               | 82.8, 89.7 | 89.1      | 86.2, 91.5 | 99.6             | 98.9, 99.8 | 99.5     | 98.3, 99.9 |          |
| rs9282799   |                                 | CC        | 99.9               | 99.8, 100.0 | 99.9     | 99.6, 100.0 | 89.5               | 87.0, 91.6 | 92.7      | 90.7, 94.2 | 99.4             | 98.0, 99.8 | 99.0     | 98.2, 99.5 |          |
|             |                                 | CT        | 0.1                | 0.0, 0.2    | 0.1      | 0.0, 0.4    | 10.3               | 8.2, 12.9  | 7.1       | 5.4, 9.2   | 0.6              | 0.2, 2.0   | 1.0      | 0.5, 1.8   |          |
|             |                                 | TT        | 0.0                | NA          | 0.0      | NA          | 0.2                | 0.1, 0.9   | 0.3       | 0.1, 0.9   | 0.0              | NA         | 0.0      | NA         |          |
| <i>NOS3</i> | rs1799983                       | GG        | 46.2               | 41.1, 51.4  | 44.9     | 41.8, 48.0  | 74.8               | 71.5, 77.8 | 75.0      | 70.6, 78.9 | 64.5             | 60.0, 68.7 | 65.5     | 62.0, 68.8 |          |
|             |                                 | GT        | 43.2               | 38.3, 48.2  | 44.7     | 41.7, 47.7  | 24.2               | 21.0, 27.6 | 24.0      | 20.3, 28.1 | 30.3             | 26.4, 34.4 | 31.4     | 28.5, 34.6 |          |
|             |                                 | TT        | 10.7               | 8.0, 14.1   | 10.5     | 8.7, 12.5   | 1.1                | 0.6, 2.0   | 1.1       | 0.6, 1.9   | 5.2              | 4.0, 6.9   | 3.1      | 2.2, 4.3   |          |
|             | rs2070744                       | CC        | 14.0               | 11.1, 17.5  | 16.5     | 14.4, 18.8  | 1.8                | 1.2, 2.8   | 1.3       | 0.9, 2.0   | 8.3              | 6.9, 10.0  | 6.2      | 4.6, 8.2   |          |
|             |                                 | CT        | 47.5               | 43.3, 51.7  | 47.7     | 44.6, 50.8  | 27.5               | 24.3, 31.0 | 26.9      | 23.0, 31.1 | 34.7             | 30.8, 38.7 | 36.8     | 32.6, 41.2 |          |
|             |                                 | TT        | 38.5               | 34.1, 43.0  | 35.8     | 32.9, 38.9  | 70.6               | 67.0, 74.0 | 71.8      | 67.5, 75.7 | 57.0             | 52.6, 61.3 | 57.0     | 52.6, 61.4 |          |
| <i>NQO1</i> | rs10517                         | CC        | 74.5               | 71.0, 77.8  | 76.3     | 73.0, 79.4  | 72.0               | 67.9, 75.8 | 75.5      | 71.6, 79.1 | 87.7             | 82.6, 91.5 | 86.7     | 83.5, 89.3 |          |
|             |                                 | CT        | 24.1               | 20.6, 28.0  | 21.5     | 18.8, 24.5  | 26.3               | 22.7, 30.3 | 22.7      | 19.5, 26.3 | 12.2             | 8.4, 17.3  | 13.0     | 10.4, 16.1 |          |
|             |                                 | TT        | 1.4                | 0.8, 2.5    | 2.1      | 1.4, 3.2    | 1.7                | 0.9, 3.2   | 1.7       | 0.8, 3.7   | 0.1              | 0.0, 0.7   | 0.3      | 0.1, 0.8   |          |
|             | rs1800566                       | CC        | 65.1               | 60.3, 69.6  | 64.3     | 60.8, 67.7  | 65.2               | 61.6, 68.5 | 66.4      | 64.3, 68.5 | 38.8             | 35.6, 42.1 | 42.1     | 38.2, 46.0 |          |
|             |                                 | CT        | 32.2               | 27.6, 37.3  | 31.5     | 28.2, 35.0  | 30.9               | 28.0, 33.9 | 30.5      | 28.5, 32.6 | 46.7             | 43.7, 49.7 | 44.4     | 40.8, 48.2 |          |
|             |                                 | TT        | 2.7                | 1.8, 4.2    | 4.2      | 3.1, 5.7    | 4.0                | 2.3, 6.8   | 3.1       | 2.5, 3.9   | 14.5             | 12.1, 17.3 | 13.5     | 11.7, 15.5 |          |
|             | rs34755915                      | AA        | 0.0                | NA          | 0.1      | 0.0, 0.7    | 0.0                | NA         | 0.0       | NA         | 0.0              | NA         | 0.0      | NA         |          |

| Gene symbol     | Variant (dbSNP ID) <sup>a</sup> | Genotype | Non-Hispanic white |            |        |            | Non-Hispanic black |            |        |            | Mexican-American |            |        |            |
|-----------------|---------------------------------|----------|--------------------|------------|--------|------------|--------------------|------------|--------|------------|------------------|------------|--------|------------|
|                 |                                 |          | Male               |            | Female |            | Male               |            | Female |            | Male             |            | Female |            |
|                 |                                 |          | %                  | 95% CI     | %      | 95% CI     | %                  | 95% CI     | %      | 95% CI     | %                | 95% CI     | %      | 95% CI     |
|                 |                                 | AG       | 4.0                | 3.0, 5.3   | 3.1    | 2.3, 4.2   | 0.9                | 0.4, 2.5   | 0.7    | 0.3, 1.4   | 1.3              | 0.6, 2.5   | 0.9    | 0.5, 1.4   |
|                 |                                 | GG       | 96.0               | 94.7, 97.0 | 96.8   | 95.6, 97.6 | 99.1               | 97.5, 99.6 | 99.3   | 98.6, 99.7 | 98.7             | 97.5, 99.4 | 99.1   | 98.6, 99.5 |
|                 | rs689452                        | CC       | 76.9               | 73.4, 80.0 | 78.2   | 75.2, 80.9 | 72.0               | 67.6, 75.9 | 76.1   | 72.2, 79.6 | 87.8             | 82.6, 91.6 | 87.3   | 83.8, 90.1 |
|                 |                                 | CG       | 22.0               | 18.8, 25.5 | 20.3   | 17.8, 23.1 | 26.4               | 22.5, 30.6 | 22.2   | 19.1, 25.7 | 12.1             | 8.4, 17.3  | 12.4   | 9.6, 15.9  |
|                 |                                 | GG       | 1.2                | 0.7, 2.0   | 1.5    | 0.9, 2.6   | 1.7                | 0.9, 3.2   | 1.7    | 0.8, 3.6   | 0.1              | 0.0, 0.7   | 0.3    | 0.1, 0.8   |
|                 | rs689453                        | AA       | 0.8                | 0.3, 1.8   | 0.3    | 0.1, 0.7   | 0.2                | 0.0, 1.0   | 0.5    | 0.1, 1.4   | 0.9              | 0.3, 2.4   | 0.3    | 0.1, 1.1   |
|                 |                                 | AG       | 15.9               | 12.9, 19.5 | 13.6   | 11.8, 15.5 | 8.5                | 6.2, 11.6  | 10.2   | 7.8, 13.3  | 8.7              | 6.2, 12.1  | 9.8    | 7.5, 12.7  |
|                 |                                 | GG       | 83.3               | 79.5, 86.5 | 86.2   | 84.2, 87.9 | 91.3               | 88.3, 93.6 | 89.3   | 86.4, 91.6 | 90.4             | 86.5, 93.3 | 89.9   | 87.0, 92.3 |
| <i>OGGI</i>     | rs1052133                       | CC       | 61.1               | 57.1, 64.9 | 61.6   | 57.8, 65.2 | 70.3               | 67.6, 72.9 | 68.9   | 65.1, 72.5 | 45.6             | 41.3, 49.9 | 42.9   | 38.7, 47.3 |
|                 |                                 | CG       | 34.8               | 31.6, 38.2 | 34.0   | 30.4, 37.8 | 27.1               | 24.5, 29.8 | 28.7   | 25.1, 32.6 | 44.8             | 40.4, 49.2 | 46.3   | 42.9, 49.7 |
|                 |                                 | GG       | 4.1                | 2.9, 5.6   | 4.4    | 3.2, 6.1   | 2.6                | 1.5, 4.6   | 2.3    | 1.3, 4.1   | 9.7              | 8.2, 11.4  | 10.8   | 9.2, 12.6  |
| <i>PONI</i>     | rs662                           | AA       | 46.4               | 41.2, 51.6 | 48.3   | 44.5, 52.0 | 11.1               | 9.1, 13.6  | 11.4   | 9.6, 13.5  | 28.7             | 24.2, 33.7 | 28.6   | 24.9, 32.5 |
|                 |                                 | AG       | 43.5               | 38.7, 48.4 | 41.4   | 37.8, 45.1 | 43.0               | 39.9, 46.1 | 43.4   | 40.5, 46.3 | 50.9             | 45.5, 56.3 | 48.3   | 42.7, 53.9 |
|                 |                                 | GG       | 10.2               | 8.4, 12.2  | 10.4   | 8.8, 12.2  | 45.9               | 42.8, 49.1 | 45.2   | 41.9, 48.6 | 20.4             | 18.0, 23.0 | 23.1   | 20.0, 26.6 |
|                 | rs854560                        | AA       | 14.5               | 12.0, 17.4 | 12.5   | 10.7, 14.5 | 2.4                | 1.6, 3.6   | 3.3    | 2.4, 4.7   | 5.7              | 4.5, 7.2   | 4.2    | 3.4, 5.3   |
|                 |                                 | AT       | 42.8               | 38.7, 47.0 | 45.6   | 42.7, 48.6 | 28.9               | 24.8, 33.4 | 30.9   | 28.3, 33.6 | 38.2             | 34.4, 42.2 | 34.0   | 31.1, 37.0 |
|                 |                                 | TT       | 42.7               | 37.1, 48.4 | 41.9   | 39.1, 44.6 | 68.7               | 63.9, 73.1 | 65.8   | 63.1, 68.5 | 56.1             | 52.3, 59.8 | 61.8   | 58.6, 65.0 |
| <i>PPARG</i>    | rs1801282                       | CC       | 76.4               | 72.2, 80.2 | 75.2   | 72.9, 77.3 | 94.6               | 92.1, 96.3 | 95.4   | 93.8, 96.6 | 78.0             | 74.7, 81.0 | 75.3   | 72.1, 78.2 |
|                 |                                 | CG       | 20.8               | 17.1, 25.1 | 23.1   | 21.1, 25.3 | 5.3                | 3.7, 7.7   | 4.6    | 3.4, 6.2   | 20.4             | 17.8, 23.3 | 23.4   | 20.7, 26.3 |
|                 |                                 | GG       | 2.7                | 1.8, 4.1   | 1.7    | 0.9, 3.2   | 0.1                | 0.0, 0.8   | 0.0    | NA         | 1.6              | 1.1, 2.4   | 1.3    | 0.6, 2.8   |
| <i>SERPINE1</i> | rs1799762 <sup>b</sup>          | 4G/4G    | 28.8               | 25.3, 32.6 | 26.6   | 24.2, 29.1 | 6.1                | 4.4, 8.5   | 7.0    | 5.7, 8.6   | 12.0             | 9.2, 15.4  | 11.8   | 9.4, 14.7  |
|                 |                                 | 4G/5G    | 47.5               | 43.7, 51.2 | 51.9   | 49.3, 54.5 | 42.0               | 38.3, 45.9 | 38.5   | 35.6, 41.6 | 42.5             | 38.8, 46.2 | 46.0   | 43.3, 48.8 |
|                 |                                 | 5G/5G    | 23.7               | 20.5, 27.3 | 21.5   | 19.7, 23.4 | 51.8               | 48.6, 55.1 | 54.5   | 51.0, 57.9 | 45.5             | 42.0, 49.1 | 42.2   | 38.2, 46.3 |
| <i>TGFBI</i>    | rs1982073                       | CC       | 16.0               | 13.2, 19.3 | 16.5   | 14.5, 18.7 | 22.6               | 20.2, 25.3 | 17.7   | 15.1, 20.6 | 27.6             | 25.0, 30.3 | 25.9   | 22.3, 29.9 |
|                 |                                 | CT       | 43.3               | 39.4, 47.3 | 45.5   | 42.2, 48.7 | 46.7               | 43.2, 50.3 | 49.3   | 46.3, 52.2 | 44.7             | 41.6, 47.7 | 49.4   | 44.9, 54.0 |
|                 |                                 | TT       | 40.7               | 36.2, 45.4 | 38.0   | 35.6, 40.5 | 30.7               | 27.8, 33.7 | 33.1   | 29.6, 36.8 | 27.8             | 24.8, 30.9 | 24.7   | 22.4, 27.1 |

| Gene symbol  | Variant (dbSNP ID) <sup>a</sup> | Genotype | Non-Hispanic white |            |            |            | Non-Hispanic black |            |            |            | Mexican-American |            |            |            |
|--------------|---------------------------------|----------|--------------------|------------|------------|------------|--------------------|------------|------------|------------|------------------|------------|------------|------------|
|              |                                 |          | Male               |            | Female     |            | Male               |            | Female     |            | Male             |            | Female     |            |
|              |                                 |          | %                  | 95% CI     | %          | 95% CI     | %                  | 95% CI     | %          | 95% CI     | %                | 95% CI     | %          | 95% CI     |
| <i>TLR4</i>  | rs4986790                       | AA       | 86.6               | 83.8, 89.0 | 87.2       | 85.8, 88.6 | 86.0               | 83.5, 88.1 | 85.5       | 83.7, 87.0 | 96.0             | 94.4, 97.2 | 94.2       | 91.0, 96.3 |
|              |                                 | AG       | 12.8               | 10.4, 15.7 | 12.2       | 11.0, 13.6 | 13.2               | 10.8, 15.9 | 14.1       | 12.6, 15.8 | 4.0              | 2.8, 5.6   | 5.7        | 3.6, 9.0   |
|              |                                 | GG       | 0.5                | 0.2, 1.2   | 0.5        | 0.3, 1.1   | 0.9                | 0.4, 2.1   | 0.4        | 0.2, 1.0   | 0.0              | NA         | 0.1        | 0.0, 0.4   |
| <i>TNF</i>   | rs1800629                       | AA       | 2.4                | 1.6, 3.6   | 3.4        | 2.2, 5.2   | 1.1                | 0.5, 2.2   | 2.4        | 1.8, 3.3   | 0.3              | 0.1, 0.9   | 0.7        | 0.3, 1.4   |
|              |                                 | AG       | 27.5               | 23.4, 32.1 | 29.8       | 26.4, 33.5 | 21.3               | 18.3, 24.6 | 23.8       | 21.6, 26.1 | 12.3             | 8.7, 17.0  | 15.0       | 12.3, 18.2 |
|              |                                 | GG       | 70.1               | 65.4, 74.4 | 66.8       | 62.8, 70.6 | 77.6               | 74.0, 80.9 | 73.8       | 71.1, 76.3 | 87.4             | 82.8, 90.9 | 84.3       | 81.0, 87.1 |
|              | rs1800750                       | AA       | 0.1                | 0.0, 0.7   | 0.1        | 0.0, 0.5   | 0.0                | NA         | 0.1        | 0.0, 0.6   | 0.0              | NA         | 0.0        | NA         |
|              |                                 | AG       | 2.5                | 1.6, 3.8   | 2.5        | 1.3, 4.6   | 4.9                | 3.4, 7.0   | 4.2        | 3.1, 5.7   | 5.1              | 4.0, 6.4   | 4.8        | 3.6, 6.4   |
|              |                                 | GG       | 97.4               | 96.1, 98.3 | 97.4       | 95.4, 98.6 | 95.1               | 93.0, 96.6 | 95.6       | 94.1, 96.8 | 94.9             | 93.6, 96.0 | 95.2       | 93.6, 96.4 |
|              | rs361525                        | AA       | 0.4                | 0.1, 1.3   | 1.0        | 0.6, 1.7   | 0.1                | 0.0, 1.0   | 0.1        | 0.0, 1.2   | 0.1              | 0.0, 0.8   | 0.4        | 0.2, 0.7   |
|              |                                 | AG       | 9.5                | 8.0, 11.3  | 10.7       | 9.3, 12.2  | 7.6                | 5.8, 10.0  | 8.3        | 6.2, 10.9  | 10.2             | 8.1, 12.7  | 12.2       | 10.6, 14.0 |
|              |                                 | GG       | 90.1               | 88.2, 91.7 | 88.3       | 86.6, 89.8 | 92.3               | 89.9, 94.1 | 91.6       | 88.9, 93.7 | 89.7             | 87.2, 91.8 | 87.4       | 85.7, 89.0 |
| <i>VDR</i>   | rs2239185                       | CC       | 26.0               | 21.8, 30.6 | 25.0       | 21.3, 29.2 | 16.4               | 14.9, 18.0 | 19.7       | 16.4, 23.5 | 34.5             | 30.9, 38.4 | 33.7       | 29.8, 37.8 |
|              |                                 | CT       | 44.5               | 40.2, 48.9 | 44.9       | 41.3, 48.6 | 52.0               | 47.7, 56.3 | 47.2       | 43.8, 50.7 | 47.3             | 44.4, 50.3 | 49.1       | 46.2, 52.0 |
|              |                                 | TT       | 29.5               | 26.3, 33.0 | 30.1       | 27.1, 33.1 | 31.6               | 27.9, 35.5 | 33.1       | 30.5, 35.7 | 18.1             | 14.8, 22.1 | 17.2       | 13.9, 21.2 |
|              | rs731236                        | CC       | 15.2               | 13.2, 17.3 | 16.0       | 14.3, 17.7 | 7.2                | 5.2, 9.9   | 7.3        | 6.0, 8.8   | 4.8              | 3.4, 6.7   | 5.1        | 3.7, 6.9   |
|              |                                 | CT       | 44.6               | 41.1, 48.2 | 45.5       | 42.5, 48.5 | 42.8               | 39.7, 46.1 | 41.1       | 37.8, 44.6 | 37.5             | 34.3, 40.9 | 38.0       | 35.0, 41.2 |
|              |                                 | TT       | 40.2               | 36.0, 44.6 | 38.5       | 35.2, 42.0 | 50.0               | 46.8, 53.1 | 51.6       | 48.0, 55.2 | 57.7             | 53.6, 61.7 | 56.9       | 53.0, 60.7 |
| <i>XRCC1</i> | rs1001581                       | AA       | 15.2               | 12.4, 18.5 | 15.5       | 14.0, 17.1 | 14.8               | 13.0, 16.8 | 14.4       | 12.5, 16.6 | 8.6              | 6.8, 11.0  | 9.7        | 8.0, 11.7  |
|              |                                 | AG       | 50.1               | 44.8, 55.5 | 48.3       | 44.7, 51.8 | 43.5               | 39.3, 47.9 | 44.7       | 42.6, 46.9 | 43.1             | 37.9, 48.3 | 41.1       | 37.4, 44.8 |
|              |                                 | GG       | 34.7               | 29.8, 39.9 | 36.2       | 32.5, 40.2 | 41.7               | 37.8, 45.7 | 40.8       | 38.7, 43.0 | 48.3             | 43.0, 53.7 | 49.2       | 45.0, 53.5 |
|              | rs1799782                       | CC       | 91.6               | 88.9, 93.7 | 89.2       | 87.9, 90.5 | 87.3               | 84.5, 89.7 | 88.9       | 87.4, 90.2 | 73.1             | 69.9, 76.0 | 72.9       | 69.7, 75.8 |
|              |                                 | CT       | 8.3                | 6.2, 10.9  | 10.3       | 9.1, 11.6  | 11.8               | 9.7, 14.2  | 10.9       | 9.6, 12.3  | 24.7             | 22.3, 27.3 | 24.1       | 21.7, 26.7 |
|              |                                 | TT       | 0.1                | 0.0, 0.6   | 0.5        | 0.1, 1.4   | 0.9                | 0.3, 2.6   | 0.3        | 0.1, 0.9   | 2.2              | 1.3, 3.5   | 3.1        | 2.0, 4.7   |
|              | rs25486                         | AA       | 39.4               | 34.8, 44.2 | 41.7       | 37.1, 46.4 | 56.8               | 53.3, 60.3 | 58.7       | 55.2, 62.2 | 53.4             | 48.9, 57.8 | 57.4       | 54.4, 60.2 |
|              |                                 | AG       | 46.9               | 41.7, 52.2 | 46.8       | 41.7, 52.1 | 36.9               | 34.5, 39.4 | 35.1       | 31.9, 38.5 | 39.9             | 36.0, 43.8 | 35.7       | 33.3, 38.1 |
|              |                                 | GG       | 13.7               | 11.1, 16.7 | 11.5       | 10.0, 13.1 | 6.3                | 4.6, 8.5   | 6.1        | 4.4, 8.4   | 6.7              | 5.6, 8.1   | 7.0        | 6.0, 8.1   |
| rs25487      | AA                              | 13.8     | 11.2, 16.8         | 11.6       | 10.2, 13.2 | 3.0        | 2.0, 4.6           | 2.6        | 1.7, 4.1   | 6.6        | 5.4, 8.0         | 7.0        | 5.9, 8.2   |            |
|              | AG                              | 47.0     | 42.1, 52.0         | 46.8       | 41.7, 51.9 | 26.5       | 23.4, 29.9         | 25.9       | 23.0, 28.9 | 39.8       | 36.3, 43.4       | 35.5       | 33.0, 38.1 |            |
|              | GG                              | 39.2     | 34.9, 43.8         | 41.6       | 37.2, 46.2 | 70.5       | 66.5, 74.1         | 71.5       | 68.3, 74.5 | 53.6       | 49.6, 57.6       | 57.5       | 54.3, 60.7 |            |

| Gene symbol | Variant (dbSNP ID) <sup>a</sup> | Genotype | Non-Hispanic white |            |        |            | Non-Hispanic black |            |        |            | Mexican-American |            |        |            |
|-------------|---------------------------------|----------|--------------------|------------|--------|------------|--------------------|------------|--------|------------|------------------|------------|--------|------------|
|             |                                 |          | Male               |            | Female |            | Male               |            | Female |            | Male             |            | Female |            |
|             |                                 |          | %                  | 95% CI     | %      | 95% CI     | %                  | 95% CI     | %      | 95% CI     | %                | 95% CI     | %      | 95% CI     |
|             | rs25489                         | AA       | 0.1                | 0.0, 0.5   | 0.1    | 0.0, 0.4   | 0.3                | 0.0, 1.7   | 0.2    | 0.1, 0.8   | 1.2              | 0.7, 2.0   | 2.1    | 1.4, 3.3   |
|             |                                 | AG       | 7.6                | 5.6, 10.3  | 7.9    | 6.3, 9.8   | 5.3                | 3.8, 7.2   | 7.5    | 5.0, 11.0  | 21.0             | 17.8, 24.5 | 22.2   | 18.5, 26.5 |
|             |                                 | GG       | 92.3               | 89.7, 94.3 | 92.0   | 90.1, 93.7 | 94.4               | 92.5, 95.9 | 92.3   | 88.9, 94.7 | 77.8             | 74.2, 81.1 | 75.7   | 70.9, 79.9 |

CI, confidence interval; NA, not applicable.

\*  $P \leq 0.05$  for genotype prevalence by sex after adjustment for race/ethnicity.

<sup>a</sup> Unique identifier in the Entrez SNP (single-nucleotide polymorphism) database at the National Center for Biotechnology Information (<http://www.ncbi.nlm.nih.gov/projects/SNP/>).

<sup>b</sup> Variant also known as rs1799768 and rs1799889.
