# Supplementary material for: Prevalence in the United States of Selected Candidate Gene Variants: Third National Health and Nutrition Examination Survey, 1991–1994
Source: PubMed Central journal article supplement — Am J Epidemiol. 2008 Oct 20;169(1):54–66. doi: 10.1093/aje/kwn286 (PMC2638878; doi:10.1093/aje/kwn286), 2008-10-20
Supplement: kwn286_7.pdf [file kwn286_7.pdf]

## Web Table 1. Primer and Probe Sequences

### TaqMan Assays

Gene symbol: *ABCB1*  
Variant: rs1045642  
Forward primer: CTGTTTGACTGCAGCATTGCT  
Reverse primer: ATGTATGTTGGCCTCCTTTGCT  
FAM-probe: CCCTCACAATCTCTT  
VIC-probe: CCCTCACGATCTCTT

Gene symbol: *ADH1B*  
Variant: rs1229984  
Forward primer: CTCTTTATTCTGTAGATGGTGGCTGTAG  
Reverse primer: CTCATGGCCTAAAATCACAGGAA  
FAM-probe: TGGTCATCTGTGCGACA  
VIC-probe: CTGTGTGACAGATTC

Gene symbol: *ADH1B*  
Variant: rs17033  
Forward primer: CCTTCCCCTGTAGCAGTCTTCA  
Reverse primer: TGAATTAATGATATTTCTAGCTGTTGCT  
FAM-probe: CCTACGAGATCTGG  
VIC-probe: ACCCTACAAGATCTG

Gene symbol: *ADH1B*  
Variant: rs2066702  
Forward primer: GTGGGTTGTCTAAATGTAAACACAATGT  
Reverse primer: GGAGGCTGAAGACTGCTACAG  
FAM-probe: ACGGTACAGATACTG  
VIC-probe: ACGGTACGATACTG

Gene symbol: *ADH1C*  
Variant: rs1693482  
Forward primer: TGA CTGATGGAGGTGTGGATTTT  
Reverse primer: GCAGAAATTT CAGGGCATGTC  
FAM-probe: ATCGGTTCGGCTTGA  
VIC-probe: CATCGGTCAGCTTG

Gene symbol: *ADH1C*  
Variant: rs698  
Forward primer: GCTAAGAAGTTTTCACTGGATGCAT  
Reverse primer: AGCGAAGCAGGTCAAATCCTT  
FAM-probe: TTCAAAGGTAAAACATTT  
VIC-probe: TTCAAAGGTAAAATATTT

Gene symbol: *ADRB2*  
Variant: rs1042713  
Forward primer: CGGCAGCGCCTTCTTG  
Reverse primer: TGCGTGACGTCGTGGTC  
FAM-probe: ACCCAATGGAAGCC  
VIC-probe: CACCCAATAGAAGCC

Gene symbol: *ADRB3*  
Variant: rs4994  
Forward primer: GCAACCTGCTGGTCATCGT  
Reverse primer: ACGAACACGTTGGTCATGGT  
FAM-probe: TCGGAGTCCAGGCGA  
VIC-probe: TCGGAGTCCGGGCGA

Gene symbol: *ALAD*  
Variant: rs1800435  
Forward primer: ACCCACACCCACACAGGTA  
Reverse primer: CAAGGGCCTCAGCATCTCTT  
FAM-probe: CCAGCCGCTTCACA  
VIC-probe: CCAGCCGGTTCACA

Gene symbol: *B9D2 (formerly MGC4093)*  
Variant: rs1800468  
Forward primer: CGTGGAGTGCTGAGGGACTCT  
Reverse primer: GCCATCCTCCCCATCAC  
FAM-probe: CCAACGTCACCACCA  
VIC-probe: CTCCAACATCACCACC

Gene symbol: *B9D2 (formerly MGC4093)*  
Variant: rs1800469  
Forward primer: AAGGAGAGCAATTCTTACAGGTGTCT  
Reverse primer: GCCTCCGGAGGGTGTCA  
FAM-probe: CATCCTTCAGGTGTC  
VIC-probe: CCATCCCTCAGGTGT

Gene symbol: *CAPN10*  
Variant: rs3792267  
Forward primer: GTGTGTGGGCAGAGGACTG  
Reverse primer: CCTCACCAAGTCAAGGCTTAGC  
FAM-probe: CCTTCAAACGCCTTAC  
VIC-probe: CACCTTCAAATGCCTTAC

Gene symbol: *CAT*  
Variant: rs769214  
Forward primer: TTTACTCTTCAACATAGCTTTTTAAAGACACAAAG  
Reverse primer: CTGCCAAATTGGCTTCTTTAAACACT  
FAM-probe: CCCCAAATTTTACCCCCAG  
VIC-probe: TCCCCAAATTTTACTCCCAG

Gene symbol: *CCL5*  
Variant: rs2280788  
Forward primer: GCTATTTTGGAAACTCCCCTTAGG  
Reverse primer: CTCAGGCTGGCCCTTTATAGG  
FAM-probe: ATGCCCTGAACTG  
VIC-probe: ATGCCCTCAACTG

Gene symbol: *CCR2*  
Variant: rs1799864  
Forward primer: CGGTGCTCCCTGTCATAAATTTGA  
Reverse primer: GTCAGTCAAGCACTTCAGCTTTT  
FAM-probe: ACATGCTGGTCGTCCT  
VIC-probe: ACATGCTGGTCATCCT

Gene symbol: *CYP1A1*  
Variant: rs2472299  
Forward primer: CACATGTTGAGCTGAGGAGTTCA  
Reverse primer: TGAGCATGTCAGATCTCTAATCAAAAATCC  
FAM-probe: AGGCATTCAGAACAA  
VIC-probe: AGGCATTCAGAATAA

Gene symbol: *CYP1A1*  
Variant: rs2606345  
Forward primer: TGACCATCTTCTTTGTCCTTTGC  
Reverse primer: TTCCAGCTCCCTGCAGTTG  
FAM-probe: ATCAGGTTGACAGATT  
VIC-probe: TCAGGGTGACAGATT

Gene symbol: *CYP1A2*  
Variant: rs11854147  
Forward primer: GGTCACAGGGTCTAAGCTACCT  
Reverse primer: GCCATTGTTTCTTCCAGGACTTG  
FAM-probe: CAAGGGATCCCTGCAC  
VIC-probe: CAAGGGACCCCTGCAC

Gene symbol: *CYP1A2*  
Variant: rs2069514  
Forward primer: AGCTATACATGACATATGCACTTTTCCA  
Reverse primer: CGTGATGGTGCACACCTGTAATT  
FAM-probe: CGCCTCTCGGATTCA  
VIC-probe: CGCCTCTCAGATTCA

Gene symbol: *CYP1A2*  
Variant: rs4886406  
Forward primer: TTCTTCAGGCACTACCCTCTCA  
Reverse primer: CCCAGCAGGAAACAGTTTAATTCTGA  
FAM-probe: CCTAACCCCTTGTAATAA  
VIC-probe: CTAACCCCGTGAATAA

Gene symbol: *CYP1B1*  
Variant: rs1056836  
Forward primer: TGTCAACCAGTGGTCTGTGAATC  
Reverse primer: TCACTCTGCTGGTCAGGTCCTT  
FAM-probe: ACCCAGTGAAGTGG  
VIC-probe: ATGACCCACTGAAGTG

Gene symbol: *CYP1B1*  
Variant: rs1056837  
Forward primer: GGCCTAACCCGGAGAACTTT  
Reverse primer: TCACTCTGCTGGTCAGGTCCTT  
FAM-probe: CAAGGATGGCCTCAT  
VIC-probe: AAGGACGGCCTCAT

Gene symbol: *CYP1B1*  
Variant: rs162557  
Forward primer: TTGCTGGTTTCAATCTCTCAAGAAGT  
Reverse primer: TGACCCTGGAATGACTGATTACATTG  
FAM-probe: TCTGAAAAGAATCTG  
VIC-probe: TCTGAAGAGAATCTG

Gene symbol: *CYP2A6*  
Variant: rs1801272  
Forward primer: AGGAGGCGGGCTTCCT  
Reverse primer: TCGTCCTGGGTGTTTTTCCT  
FAM-probe: TCGACGCCCTCCGGGGC  
VIC-probe: TCGACGCCACCGGGGC

Gene symbol: *CYP2C19*  
Variant: rs4986894  
Forward primer: AAGGAGCATATAGTGGGCCTAGGT  
Reverse primer: ATGCTAATTAAGTGTGTGTGCCTCTT  
FAM-probe: TGATGGATAAAGTGGC  
VIC-probe: ATGGATGAAGTGGCCA

Gene symbol: *CYP2C9*  
Variant: rs1057910  
Forward primer: GCCACATGCCCTACACAGATG  
Reverse primer: GAATTTAATGTACAGGTCACACTGCAT  
FAM-probe: AAGGTCAAGGTATCTC  
VIC-probe: AGGTCAATGTATCTCT

Gene symbol: *CYP3A4*  
Variant: rs2740574  
Forward primer: TGGAATGAGGACAGCCATAGAGA  
Reverse primer: AGTGGAGCCATTGGCATAAAATCT  
FAM-probe: AAGGGCAGGAGAGAG  
VIC-probe: AAGGGCAAGAGAGAG

Gene symbol: *F5*  
Variant: rs6025  
Forward primer: CATGTTCTAGCCAGAAGAAATTCTCAGA  
Reverse primer: CTGGGCTAATAGGACTACTTCTAATCTGT  
FAM-probe: CAGGCAAGGAATAC  
VIC-probe: AGGCGAGGAATAC

Gene symbol: *FAM82A*  
Variant: rs163086  
Forward primer: TCGTGCCTTGGTTCTTCTCTCT  
Reverse primer: ATCAGAACCCTTCCGTCTCTCA  
FAM-probe: CAGTGTTACGGGCT  
VIC-probe: CCAGTGCTCACGGG

Gene symbol: *FCGR2A*  
Variant: rs1801274  
Forward primer: CCAGAATGGAAAATCCCAGAAAT  
Reverse primer: TTTGCTTGTGGGATGGAGAAG  
FAM-probe: TCTCCCGTTTGGATC  
VIC-probe: CTCCATTTGGATCC

Gene symbol: *FCB*  
Variant: rs1800790  
Forward primer: GTTATTTTGATTAATGTCTAAAACAAAAGATAAACACATTATGAT  
Reverse primer: GCAACCACTAAAATCGTGACTCATT  
FAM-probe: CTATTGATTTTAATGGCCCC  
VIC-probe: TTACTATTGATTTTAATAGCCCC

Gene symbol: *IL10*  
Variant: rs1800871  
Forward primer: GAGGAAACCAAATTCTCAGTTAGCA  
Reverse primer: TTATAGTGAGCAAAGTGGGCACAG  
FAM-probe: AGGTGATGTAATATCT  
VIC-probe: AGGTGATGTAACATCT

Gene symbol: *IL10*  
Variant: rs1800872  
Forward primer: GGTAAGGAGCCTGGAACACATC  
Reverse primer: GCCCTTCCATTTTACTTTCCAGAGA  
FAM-probe: TGGCTTCTACAGGAC  
VIC-probe: CTGGCTTCTACAGTAC

Gene symbol: *IL10*  
Variant: rs1800896  
Forward primer: ACACACACAAATCCAAGACAACACT  
Reverse primer: GCTGGATAGGAGGTCCCTTACTTT  
FAM-probe: TCCCCCTCCCAAAG  
VIC-probe: TCCCCCTCCCAAAGA

Gene symbol: *IL1B*  
Variant: rs1143623  
Forward primer: AGGTATCGTGCTCGCTCTG  
Reverse primer: TCGTGTCTCAAATACTTGCACAGA  
FAM-probe: CTCCCTTGCATAATG  
VIC-probe: ACTCCCTTGGATAATG

Gene symbol: *IL4*  
Variant: rs2243248  
Forward primer: ACTGACTAGGAGGGCTGATTTGTAA  
Reverse primer: GGAACCTAAACACATCCTCAGCTAA  
FAM-probe: AGCTACCGTCTTACC  
VIC-probe: AGAGCTACAGTCTTAC

Gene symbol: *IL4*  
Variant: rs2243250  
Forward primer: GACCTGTCCCTTCTCAAAACACCTAA  
Reverse primer: GGCAGAATAACAGGCAGACTCT  
FAM-probe: CATTGTTCCCCAGTGCT  
VIC-probe: CATTGTCCCCAGTGCT

Gene symbol: *IL4*  
Variant: rs2243270  
Forward primer: CAAACAGTATCAACAGTTGACCCCTAT  
Reverse primer: CTCATCCCACCAGCCAGAG  
FAM-probe: AAATATTAACAGCAGTAGTTAC  
VIC-probe: AAAATATTAACAGCAATAGTTAC

Gene symbol: *IL4R*  
Variant: rs1801275  
Forward primer: GCCGAAATGTCCTCCAGCAT  
Reverse primer: CCTGCTCCACCGCATGTA  
FAM-probe: CAGTGGCTATCGGGAGT  
VIC-probe: CAGTGGCTATCAGGAGT

Gene symbol: *IL4R*  
Variant: rs1805015  
Forward primer: AGGCAACCCTGCTTACCG  
Reverse primer: TCTCTGGGACACGGTGACT  
FAM-probe: TTCAGCAACTCCCTG  
VIC-probe: CTCAGCAACCCCCTG

Gene symbol: *ITGA2*  
Variant: rs1126643  
Forward primer: CATCCCAGACATCCCAATATGGT  
Reverse primer: GGCCTATTAGCACCAAACTTACCT  
FAM-probe: TTGCTCAAATGTG  
VIC-probe: AATTGCTCCGAATGTG

Gene symbol: *MBL2*  
Variant: rs11003125  
Forward primer: CCAACGTAGTAAGAAATTTCCAGAGA  
Reverse primer: CAACCCAGCCCAGAATTAAC TG  
FAM-probe: AGCCTGTGTAAAAC  
VIC-probe: CCTGTCTAAAACACC

Gene symbol: *MBL2*  
Variant: rs1800450  
Forward primer: GGCTTCCCAGGCAAAGATG  
Reverse primer: AGCCCAACACGTACCTGGTT  
FAM-probe: CCTGGTGCCATCA  
VIC-probe: CCTGGTGT CATCAC

Gene symbol: *MBL2*  
Variant: rs1800451  
Forward primer: GGCTTCCCAGGCAAAGATG  
Reverse primer: AGCCCAACACGTACCTGGTT  
FAM-probe: ACCAAGGGAGAAAA  
VIC-probe: CAAGGAAGAAAAGG

Gene symbol: *MBL2*  
Variant: rs5030737  
Forward primer: CCTGTAGCTCTCCAGGCATCA  
Reverse primer: AGCCCAACACGTACCTGGTT  
FAM-probe: CATCACACCCATCTT  
VIC-probe: ATCACGCCCATCTT

Gene symbol: *MBL2*  
Variant: rs7096206  
Forward primer: GCACGGTCCCATTTGTTCTCA  
Reverse primer: GCGTTGCTGCTGGAAGACTATAAA  
FAM-probe: CATGCTTTCCGTGGCAG  
VIC-probe: CATGCTTTCCGTGGCAG

Gene symbol: *MTHFR*  
Variant: rs1801131  
Forward primer: GGAGGAGCTGCTGAAGATGTG  
Reverse primer: CCCGAGAGGTAAAGAACAAAGACTT  
FAM-probe: AGACACTTGCTTCACT  
VIC-probe: CAAAGACACTTTCTTC



Gene symbol: *MTRR*  
Variant: rs1801394  
Forward primer: CATGCCTTGAAGTGATGAGG  
Reverse primer: GATCTGCAGAAAATCCATGTACCA  
FAM-probe: CTTGCTCACACATTT  
VIC-probe: TGCTCACATATTTTC

Gene symbol: *NAT2*  
Variant: rs1041983  
Forward primer: CAGACCACAATGTTAGGAGGGTATT  
Reverse primer: CCATGCCAGTGCTGTATTTGTTA  
FAM-probe: CTGGAGGGATATAAA  
VIC-probe: ACTGGAGGGATGTAAA

Gene symbol: *NAT2*  
Variant: rs1208  
Forward primer: CTCTCACTGAGGAAGAGGTTGAAGA  
Reverse primer: ACGAGATTTCTCCCAAGGAA  
FAM-probe: AGTGCTGAGAAATA  
VIC-probe: AGTGCTGAAAAAT

Gene symbol: *NAT2*  
Variant: rs1799930  
Forward primer: CTGCCAAAGAAGAAACACCAAAA  
Reverse primer: TGGAGACGTCTGCAGGTATGTATT  
FAM-probe: ACCTCGAACAATTG  
VIC-probe: TGAACCTCAAACAATT

Gene symbol: *NAT2*  
Variant: rs1801279  
Forward primer: GGAGTTGGGCTTAGAGGCTATTTT  
Reverse primer: CAGAAGTTGATTGACCTGGAGACA  
FAM-probe: CCACCCCGGTTTC  
VIC-probe: CCCACCCTGGTTTC

Gene symbol: *NAT2*  
Variant: rs1801280  
Forward primer: CACTGGCATGGTTCACCTTCT  
Reverse primer: ACATCTGGGAGGAGCTTCCA  
FAM-probe: TGACCATTGACGGCAG  
VIC-probe: TGACCACTGACGGCA

Gene symbol: *NOS3*  
Variant: rs1799983  
Forward primer: GGCTGGACCCCAGGAAA  
Reverse primer: CACCCAGTCAATCCCTTTGGT  
FAM-probe: CCCAGATGATCCCCCA  
VIC-probe: CCAGATGAGCCCCCA

Gene symbol: *NOS3*  
Variant: rs2070744  
Forward primer: ACCAGGGCATCAAGCTCTTC  
Reverse primer: GCAGGTCAGCAGAGAGACTAG  
FAM-probe: CAGGGTCAGCCAGCCA  
VIC-probe: CAGGGTCAGCCGGCCA

Gene symbol: *NQO1*  
Variant: rs10517  
Forward primer: CCAAGGTCATGGGACTGGAC  
Reverse primer: CAGAAGGTTATTTTCTTTATCATTGCTAAACTGAT  
FAM-probe: CATCCCATGGTAAGTC  
VIC-probe: CCATCCCATAGTAAGTC

Gene symbol: *NQO1*  
Variant: rs1800566  
Forward primer: TGCATTTCTGTGGCTTCCAA  
Reverse primer: CTGGAGTGTGCCCAATGCTATA  
FAM-probe: TCAGTTGAGATTCTAAG  
VIC-probe: TGTCAGTTGAGGTTCT

Gene symbol: *NQO1*  
Variant: rs34755915  
Forward primer: TCTAGGACAATAAGCACGCAAATGT  
Reverse primer: CCGCAGACCTTGTGATATTCCA  
FAM-probe: CTGACACCCCTTCC  
VIC-probe: CCTGACACCCCTTCC

Gene symbol: *NQO1*  
Variant: rs689452  
Forward primer: TGCCTACAGAGACACACACAAAG  
Reverse primer: GAAGGTTTGCTGGTTGGTAATGG  
FAM-probe: CACACAGGGAAAAC  
VIC-probe: CACACACGGAAAAC

Gene symbol: *NQO1*  
Variant: rs689453  
Forward primer: CACCTCCCATCCTTTCTTCTTCAAA  
Reverse primer: ATCGTACTGGCTCACTCAGAGA  
FAM-probe: ATGAAGGAAGCTGCTG  
VIC-probe: ATGAAGGAGGCTGCTG

Gene symbol: *OGG1*  
Variant: rs1052133  
Forward primer: CCCTCCTACAGGTGCTGTTCAG  
Reverse primer: ACCCTTTCTGCGCTTTGCT  
FAM-probe: CCAATCCCGCCATG  
VIC-probe: CCAATGCCGCCATG

Gene symbol: *PON1*  
Variant: rs662  
Forward primer: CACTTTTATGGCACAAATGATCACT  
Reverse primer: CCACGCTAAACCCAAATACATCTC  
FAM-probe: CCTACTTACGATCCTG  
VIC-probe: CCTACTTACAATCCTG

Gene symbol: *PON1*  
Variant: rs854560  
Forward primer: GAAAACACTCACAGAGCTAATGAAAGC  
Reverse primer: ACAACCTGTACTTTCTGTCTCTTTTCTG  
FAM-probe: CAGTATCTCCATGTCTTC  
VIC-probe: AGTATCTCCAAGTCTTC

Gene symbol: *PPARG*  
Variant: rs1801282  
Forward primer: GTTATGGGTGAAACTCTGGGAGATT  
Reverse primer: GCAGACAGTGTATCAGTGAAGGAAT  
FAM-probe: CTATTGACGCAGAAAG  
VIC-probe: CTCCTATTGACCCAGAAAG

Gene symbol: *TGFBI*  
Variant: rs1982073  
Forward primer: CCCACCACACCAGCCCTGTTC  
Reverse primer: TTCCGCTTACCAGCTCCATGT  
FAM-probe: TAGCAGCAGCAGCAGCAGCAGCCG  
VIC-probe: TAGCAGCAGCGGCAGCAGCC

Gene symbol: *TLR4*  
Variant: rs4986790  
Forward primer: CCATTGAAGAATTCCGATTAGCATA  
Reverse primer: CACTCACCAGGGAAAATGAAGAA  
FAM-probe: CTCGATGGTATTATTG  
VIC-probe: CCTCGATGATATTATT

Gene symbol: *TNF*  
Variant: rs1800629  
Forward primer: CCAAAAGAAATGGAGGCAATAGGTT  
Reverse primer: GGACCCTGGAGGCTGAAC  
FAM-probe: CCCGTCCCCATGCC  
VIC-probe: CCCGTCTCATGCC

Gene symbol: *TNF*  
Variant: rs1800750  
Forward primer: CCCCTCCCAGTTCTAGTTCTATCTT  
Reverse primer: CCTATTGCCTCCATTTCTTTTGG  
FAM-probe: TTCCTTCTAACTTCC  
VIC-probe: TTCCTTCTAATTCC

Gene symbol: *TNF*  
Variant: rs361525  
Forward primer: CAGTCAGTGGCCCAGAAGAC  
Reverse primer: AGCATCAAGGATACCCCTCACA  
FAM-probe: CCCTGCTCCGATTC  
VIC-probe: CTCCTGCTCTGATTC

Gene symbol: *VDR*  
Variant: rs2239185  
Forward primer: GGGAAAGACGAAACAGCAACAC  
Reverse primer: CCCCTCCCTCACCTGTGT  
FAM-probe: CTGTCTTCACACCTGCA  
VIC-probe: CTGTCTTCACGCCTGCA

Gene symbol: *XRCC1*  
Variant: rs1799782  
Forward primer: GAGGATGAGAGCGCCAACTC  
Reverse primer: CTCACTCAGGACCCACGTTGT  
FAM-probe: TTCAGCCGGATCAA  
VIC-probe: CTCAGCTGGATCAA

Gene symbol: *XRCC1*  
Variant: rs25486  
Forward primer: TGTCTCTCTCTCTCTCTGTCTGTCT  
Reverse primer: GATGCCAGTTAGGTGTGATCTGA  
FAM-probe: CTGTCTCGTTCCCC  
VIC-probe: CTGTCTCATTCCCC

Gene symbol: *XRCC1*  
Variant: rs25487  
Forward primer: GTGGGTGCTGGACTGTCA  
Reverse primer: GCAGGGTTGGCGTGTGA  
FAM-probe: CCTCCCGGAGGTAA  
VIC-probe: CCCTCCAGAGGTAA

Gene symbol: *XRCC1*  
Variant: rs25489  
Forward primer: GTGGTGCTAACCTAATCTACTCTTTGTCT  
Reverse primer: TGGGCTCGGTGCCTTCT  
FAM-probe: AGCTCCAACTCGTACCCCAGCCA  
VIC-probe: CAGTCCAACTCATACCCCAGCCA

### **MGB Eclipse Probe System Assays**

Gene symbol: *ADRB1*  
Variant: rs1801252§  
Forward primer: CGCCCN\*CCTCGTTN\*CTGCCT  
Reverse primer: CTGTCCACTGCTGAGACAGC  
FAM-probe: CCAGCGAAGGCC  
VIC-probe: CCAGCGAAAGCC

Gene symbol: *CBS*  
Variant: none§  
Forward primer: CTGGCCTTGAGCCCTGAA  
Reverse primer: TTGTCTGCTCCGTCTGGTT  
FAM-probe: GCTCCTCCGGCTC  
VIC-probe: CACCTGGA\*TGA\*TC

Gene symbol: *CXCL12*  
Variant: rs169097  
Forward primer: CCATCATCATGTGTGTCCACGACT  
Reverse primer: AGA\*CA\*TTTTCA\*TTTCCTGCTTG  
FAM-probe: CCCCACAAAAGGA  
VIC-probe: ATGGCCCTGCAA

Gene symbol: *CYP2C19*  
Variant: rs4986893  
Forward primer: GATCA\*GCAA\*TTTCTTA\*ACTTGATG  
Reverse primer: GACTGTAAGTGGTTTCTCAGGA  
FAM-probe: ACCCCCTGAATCC  
VIC-probe: CACCCCTGGAT

Gene symbol: *CYP2E1*  
Variant: rs2031920  
Forward primer: AGTGA\*TTTGGCTGGATTG  
Reverse primer: GTGTGTGGTTAGA\*ATGAAGAG  
FAM-probe: AAAAG\*T\*ACAAA\*A\*TTGC  
VIC-probe: AAAAG\*T\*AT\*AAA\*A\*T\*T\*GCA

Gene symbol: *ITGB3*  
Variant: rs59188  
Forward primer: TGCAGGAGGTAGAGAGTCGCCATA  
Reverse primer: CAGCAGATTCTCCTTCAGGTCACA  
FAM-probe: CTCCGG\*GCTCAC  
VIC-probe: CTCTGG\*GCTCAC

Gene symbol: *MTHFR*  
Variant: rs1801133  
Forward primer: GGAAGAATGTGTCAGCCTCAAA  
Reverse primer: GACCTGAAGCACTTGAAGGAGA  
FAM-probe: ATCGGCTCCCGC  
VIC-probe: AATCGACTCCCGC

Gene symbol: *MTHFR*  
Variant: rs2066470  
Forward primer: AGATTCCAATCGCCGCCTCATCTTC  
Reverse primer: GCTCCAAAGATAGTTCGAGATGTTCC  
FAM-probe: GCTCGG\*GGTCCA  
VIC-probe: CGCTCAGG\*GTCCA

Gene symbol: *NOS2A*  
Variant: rs1800482§  
Forward primer: GGCA\*GATCACTTGAGCTTCAGA  
Reverse primer: GAGACTGGGTTTCACCATGTTGT  
FAM-probe: TTCGACACCAGC  
VIC-probe: TTCGAGACCAGC

Gene symbol: *NOS2A*  
Variant: rs9282799§  
Forward primer: AATA\*ACAATA\*CA\*TTAGGGAGAA  
Reverse primer: TGAGTGGACAGTGGTAGCAA  
FAM-probe: TCACCGTCCCAA  
VIC-probe: CTCACCATCCCAA

Gene symbol: *SERPINE1*  
Variant: rs1799762, rs1799768, rs1799889§  
Forward primer: CAGACAAGGTTGTTGACACAAGAGA  
Reverse primer: CGATGATACACGGCTGACT  
FAM-probe: ACGTGG\*GGAGTCA  
VIC-probe: ACGTGG\*GG\*GAGT

Gene symbol: *VDR*  
Variant: rs731236§  
Forward primer: GGATCATCTTGGCATAGAGCAGGT  
Reverse primer: TATCCCCGTGCCACA  
FAM-probe: ATGGCCTCGATCA  
VIC-probe: ATGGCCTCAATCAG

Gene symbol: *XRCC1*  
Variant: rs1001581  
Forward primer: AA\*GCTGACCTGGTGGAGTCT  
Reverse primer: CTCCATGCAGCACA\*GGGTAT  
FAM-probe: TGG\*GN\*GCGTATG  
VIC-probe: GGTGG\*GN\*GCATA

## Pyrosequencing Assays

Gene symbol: *ADRB2*  
Variant: rs1042714§  
Forward primer†: GAACGGCAGCGCCTTCTT  
Reverse primer: ACATGACGATGCCCATGC  
FAM-probe: CACACCTCGTCCCTT

Gene symbol: *F2*  
Variant: rs1799963§  
Forward primer†: AGAGTAGGGGGCCACTCATATTCT  
Reverse primer: ATAGCACTGGGAGCATTGAGG  
FAM-probe: CTGGGAGCATTGAGG

## Capillary Fragment Analysis

Gene symbol: *ACE*  
Variant: rs4646994§  
Forward primer‡: CTGGAGACCACTCCCATCCTTTCT  
Reverse primer: GATGTCGCCATCACATTCGTCAGAT

\* Proprietary modified superbase (Super G<sup>TM</sup>, Super A<sup>TM</sup>, or Super T<sup>TM</sup>). N\* is a universal proprietary modified base, Super N<sup>TM</sup> (Nanogen [formerly Epoch Biosciences], Bothell, Washington).

† Primer biotinylated at 5' end.

‡ Primer labeled with FAM at 5' end.

§ Variant was genotyped on all specimens in the Division of Laboratory Sciences, National Center for Environmental Health, Centers for Disease Control and Prevention, Atlanta, GA.
